# Supplementary material for: The enhancement of nonlinear optical properties of azulene-based nanographene by N atoms: a finishing touch
Source: Royal Society of Chemistry journal article supplement (doi:10.1039/d3sc04443b), 2023-12-11
Supplement: d3sc04443b1.pdf [file d3sc04443b1.pdf]

## Supporting information

### The enhancement of nonlinear optical properties of azulene-based nanographene by N atoms: a finishing touch

Ya Qing Zhang,<sup>#a</sup> Cui-Cui Yang,<sup>#ab</sup> Jia-Ying Ma,<sup>a</sup> Wei Quan Tian,<sup>\*a</sup>

<sup>a</sup>Chongqing Key Laboratory of Theoretical and Computational Chemistry, College of Chemistry and Chemical Engineering, Chongqing University, Huxi Campus, Chongqing 401331, P. R. China. E-mail: tianwq@cqu.edu.cn

<sup>b</sup>College of Science, Chongqing University of Technology, Huaxi Campus, Chongqing 400054, P. R. China

<sup>#</sup>Y. Q. Zhang and C. C. Yang contributed equally to this work.

#### Supporting Information list:

**Figure S1** The structure of B, N doped nanographenes. H or P in square brackets indicates that the carbon atom at the end of a heptagon (H) or pentagon (P) in azulene of A1A2A3 is replaced by B and N atoms.

**Figure S2** The proposed Kekulé structures of all investigated molecules according to bond distance and spin distribution.

**Figure S3** Evolution of the static first hyperpolarizability ( $\langle\beta_0\rangle$ ) and the static second hyperpolarizability ( $\langle\gamma_0\rangle$ ) with the numbers of excited states in A1[H<sub>N</sub>]A3[P<sub>N</sub>] and A1[H<sub>N</sub>]A2[H<sub>N</sub>P<sub>N</sub>]A3[P<sub>N</sub>], respectively.

**Figure S4a** The frontier molecular orbitals (H: HOMO; L: LUMO) correlation and energy diagrams of A1A2A3, A2[H<sub>B</sub>P<sub>B</sub>], A2[H<sub>B</sub>P<sub>N</sub>] and A2[H<sub>N</sub>P<sub>N</sub>] predicted with B3LYP/6-31G (d, p).

**Figure S4b** The frontier molecular orbitals (H: HOMO; L: LUMO) correlation and energy diagrams of A1A2A3, A1[H<sub>N</sub>P<sub>N</sub>], A2[H<sub>N</sub>P<sub>N</sub>], A3[H<sub>N</sub>P<sub>N</sub>] and A1[H<sub>N</sub>]A3[P<sub>N</sub>] predicted with B3LYP/6-31G (d, p).

**Figure S4c** The frontier molecular orbitals (H: HOMO; L: LUMO) correlation and energy diagrams of A1A2A3, A1[H<sub>B</sub>P<sub>B</sub>], A1[H<sub>B</sub>P<sub>N</sub>], A1[H<sub>N</sub>P<sub>B</sub>] and A1[H<sub>N</sub>P<sub>N</sub>] predicted with B3LYP/6-31G (d, p).

**Figure S4d** The frontier molecular orbitals (H: HOMO; L: LUMO) correlation and energy diagrams of A1A2A3, A3[H<sub>B</sub>P<sub>B</sub>], A3[H<sub>B</sub>P<sub>N</sub>], A3[H<sub>N</sub>P<sub>B</sub>] and A3[H<sub>N</sub>P<sub>N</sub>] predicted with B3LYP/6-31G (d, p).

**Figure S4e** The frontier molecular orbitals (H: HOMO; L: LUMO) correlation and energy diagrams of A1A2A3, A1[H<sub>B</sub>]A3[P<sub>B</sub>], A1[H<sub>B</sub>]A3[P<sub>N</sub>], A1[H<sub>N</sub>]A3[P<sub>B</sub>] and A1[H<sub>N</sub>]A3[P<sub>N</sub>] predicted with B3LYP/6-31G (d, p).

**Figure S4f** The frontier molecular orbitals (H: HOMO; L: LUMO) correlation and energy diagrams of A1A2A3,

A1[H<sub>B</sub>P<sub>B</sub>]A2[H<sub>B</sub>P<sub>B</sub>]A3[H<sub>B</sub>P<sub>B</sub>], A1[H<sub>B</sub>P<sub>N</sub>]A2[H<sub>B</sub>P<sub>N</sub>]A3[H<sub>B</sub>P<sub>N</sub>], A1[H<sub>N</sub>P<sub>B</sub>]A2[H<sub>N</sub>P<sub>B</sub>]A3[H<sub>N</sub>P<sub>B</sub>] and A1[H<sub>N</sub>P<sub>N</sub>]A2[H<sub>N</sub>P<sub>N</sub>]A3[H<sub>N</sub>P<sub>N</sub>] predicted with B3LYP/6-31G (d, p).

**Figure S4g** The frontier molecular orbitals (H: HOMO; L: LUMO) correlation and energy diagrams of A1A2A3, A1[H<sub>B</sub>P<sub>B</sub>]A2[H<sub>B</sub>P<sub>B</sub>], A1[H<sub>B</sub>P<sub>N</sub>]A2[H<sub>B</sub>P<sub>N</sub>], A1[H<sub>N</sub>P<sub>B</sub>]A2[H<sub>N</sub>P<sub>B</sub>] and A1[H<sub>N</sub>P<sub>N</sub>]A2[H<sub>N</sub>P<sub>N</sub>] predicted with B3LYP/6-31G (d, p).

**Figure S4h** The frontier molecular orbitals (H: HOMO; L: LUMO) correlation and energy diagrams of A1A2A3, A2[H<sub>B</sub>P<sub>B</sub>]A3[H<sub>B</sub>P<sub>B</sub>], A2[H<sub>B</sub>P<sub>N</sub>]A3[H<sub>B</sub>P<sub>N</sub>], A2[H<sub>N</sub>P<sub>B</sub>]A3[H<sub>N</sub>P<sub>B</sub>] and A2[H<sub>N</sub>P<sub>N</sub>]A3[H<sub>N</sub>P<sub>N</sub>] predicted with B3LYP/6-31G (d, p).

**Figure S4i** The frontier molecular orbitals (H: HOMO; L: LUMO) correlation and energy diagrams of A1A2A3, A1[H<sub>B</sub>P<sub>B</sub>]A3[H<sub>B</sub>P<sub>B</sub>], A1[H<sub>B</sub>P<sub>N</sub>]A3[H<sub>B</sub>P<sub>N</sub>], A1[H<sub>N</sub>P<sub>B</sub>]A3[H<sub>N</sub>P<sub>B</sub>] and A1[H<sub>N</sub>P<sub>N</sub>]A3[H<sub>N</sub>P<sub>N</sub>] predicted with B3LYP/6-31G (d, p).

**Figure S4j** The frontier molecular orbitals (H: HOMO; L: LUMO) correlation and energy diagrams of A1A2A3, A1[H<sub>B</sub>]A2[H<sub>B</sub>P<sub>B</sub>]A3[P<sub>B</sub>], A1[H<sub>B</sub>]A2[H<sub>N</sub>P<sub>B</sub>]A3[P<sub>N</sub>], A1[H<sub>N</sub>]A2[H<sub>B</sub>P<sub>N</sub>]A3[P<sub>B</sub>] and A1[H<sub>N</sub>]A2[H<sub>N</sub>P<sub>N</sub>]A3[P<sub>N</sub>] predicted with B3LYP/6-31G (d, p).

**Figure S5** The frontier molecular orbitals (H: HOMO; L: LUMO) correlation and energy diagrams of A1A2A3, A1[H<sub>B</sub>P<sub>B</sub>], A3[H<sub>B</sub>P<sub>N</sub>] and A1[H<sub>N</sub>]A3[P<sub>N</sub>] predicted with B3LYP/6-31G (d, p).

**Figure S6** Two-dimensional second order NLO spectra predicted with TD-CAM-B3LYP/6-31++G(d, p)-SOS [damping coefficients  $\Gamma_m = 0.01 \times \epsilon_m/\epsilon_2$ ] of (a) A3[H<sub>N</sub>P<sub>N</sub>], (b), (c), (d) A1[H<sub>N</sub>]A3[P<sub>N</sub>], and (e) A1[H<sub>N</sub>]A2[H<sub>N</sub>P<sub>N</sub>]A3[P<sub>N</sub>] with step size of 0.005 eV. (a)  $\omega_1$  scanned from -0.50 eV to 0.50 eV and  $\omega_2$  scanned from 2.00 eV to 3.00 eV; (b)  $\omega_1$  scanned from -0.50 eV to 0.50 eV and  $\omega_2$  scanned from 1.50 eV to 2.50 eV; (c)  $\omega_1$  scanned from 0.50 eV to 1.50 eV and  $\omega_2$  scanned from 0.50 eV to 1.50 eV; (d)  $\omega_1$  scanned from -1.50 eV to -0.50 eV and  $\omega_2$  scanned from 1.50 eV to 2.50 eV; (e)  $\omega_1$  scanned from -0.50 eV to 0.50 eV and  $\omega_2$  scanned from 2.00 eV to 3.00 eV.

**Figure S7** Evolution of third-order nonlinear optic properties with electronic spectra of A1A2A3 at specific external fields.

**Figure S8** Evolution of third-order nonlinear optic properties with electronic spectra of A1[H<sub>N</sub>]A2[H<sub>N</sub>P<sub>N</sub>]A3[P<sub>N</sub>] at specific external fields.

**Figure S9** (a) Fine-scanned TDTPA of A1A2A3 and A1[H<sub>N</sub>]A2[H<sub>N</sub>P<sub>N</sub>]A3[P<sub>N</sub>] from 1.60 eV to 2.10 eV. (b) Fine-scanned TDTPA of A1[H<sub>N</sub>]A2[H<sub>N</sub>P<sub>N</sub>]A3[P<sub>N</sub>] from 0.90 eV to 1.40 eV.

**Table S1** The relative energy ( $\Delta E$  with respect to the most stable isomer  $\Delta E = 0$ , in eV), the lowest vibrational frequency (LVF, in  $\text{cm}^{-1}$ ), energy gap ( $E_{\text{gap}}$ , in eV) between the HOMO ( $E_{\text{H}}$ , in eV) and the LUMO ( $E_{\text{L}}$ , in eV) the static first and second hyperpolarizability ( $\langle\beta_0\rangle$  and  $\langle\gamma_0\rangle$ ), the  $\langle\beta_0\rangle$  (in  $10^{-30}$  esu) and  $\langle\gamma_0\rangle$  (in  $10^{-34}$  esu) per heavy

atom ( $\langle\beta_0\rangle/N$  and  $\langle\gamma_0\rangle/N$ ) of A1A2A3 and its N-doped series of molecules in closed-shell singlet predicted with B3LYP/6-31G(d, p) and TD-CAM-B3LYP/6-31++G(d, p)-SOS, respectively. The relative electronic energy differences ( $\Delta E_{OS-CS}$  and  $\Delta E_{T-CS}$ , in kcal/mol) between open-shell singlet (OS) or triplet (T) and closed-shell singlet (CS) (CS is taken as reference), and spin contamination of open-shell singlet ( $\langle S^2 \rangle_{OS}$ ) obtained at the UB3LYP/6-31G (d, p) level.

**Table S2** Major absorption peaks with transition nature in azulene-based molecules ( $f$  is the oscillator strength in the arbitrary unit,  $E$  is the transition energy in eV unit,  $\lambda$  is the wavelength in nm unit, TNMC to  $\langle\beta_0\rangle$  is the transition nature of electron excitation with a major contribution to  $\langle\beta_0\rangle$ , and  $\langle\beta_0\rangle_{con}$  is contribution value to  $\langle\beta_0\rangle$  in  $10^{-30}$  esu).

**Table S3** Calculated important parameters of  $(\beta_{ijk})_m$  [ $i, j, k \in (x, y, z)$ ] ( $\times 10^{-30}$  esu) of azulene-based molecules. The  $[(\beta_{ijk})_m]$  is the first hyperpolarizability tensor of the  $m$ th excited state ( $S_m$ ) with a major contribution to the static first hyperpolarizability ( $\langle\beta_0\rangle$ ),  $m = 0$  is the ground state, and  $m > 0$  is the  $m$ th excited state].

**Table S4** Major electron excitations with transition nature in A1[H<sub>N</sub>]A3[P<sub>N</sub>], A1[H<sub>N</sub>]A2[H<sub>N</sub>P<sub>N</sub>]A3[P<sub>N</sub>] and AG. The  $f$  is the oscillator strength,  $\lambda$  is the wavelength, and TNMC to  $\langle\gamma_0\rangle_{3L}$  is the transition nature of electron excitation with a major contribution to  $\langle\gamma_0\rangle_{3L}$ .

**Table S5** Calculated important parameters of  $(\gamma_{ijk})_m$  ( $\times 10^{-34}$  esu) of azulene-based molecules. The  $(\gamma_{ijk})_m$  is the second hyperpolarizability tensor of the  $m$ th excited state ( $S_m$ ) with a major contribution to the static first hyperpolarizability ( $\langle\beta_0\rangle$ ),  $m = 0$  is the ground state, and  $m > 0$  is the  $m$ th excited state.

**Table S6** The strong response and corresponding major electron excitation contribution of the dynamic third-order nonlinear optic response for A1A2A3.

**Table S7** The strong response and corresponding major electron excitation contribution of the dynamic third-order nonlinear optic response for A1[H<sub>N</sub>]A2[H<sub>N</sub>P<sub>N</sub>]A3[P<sub>N</sub>].

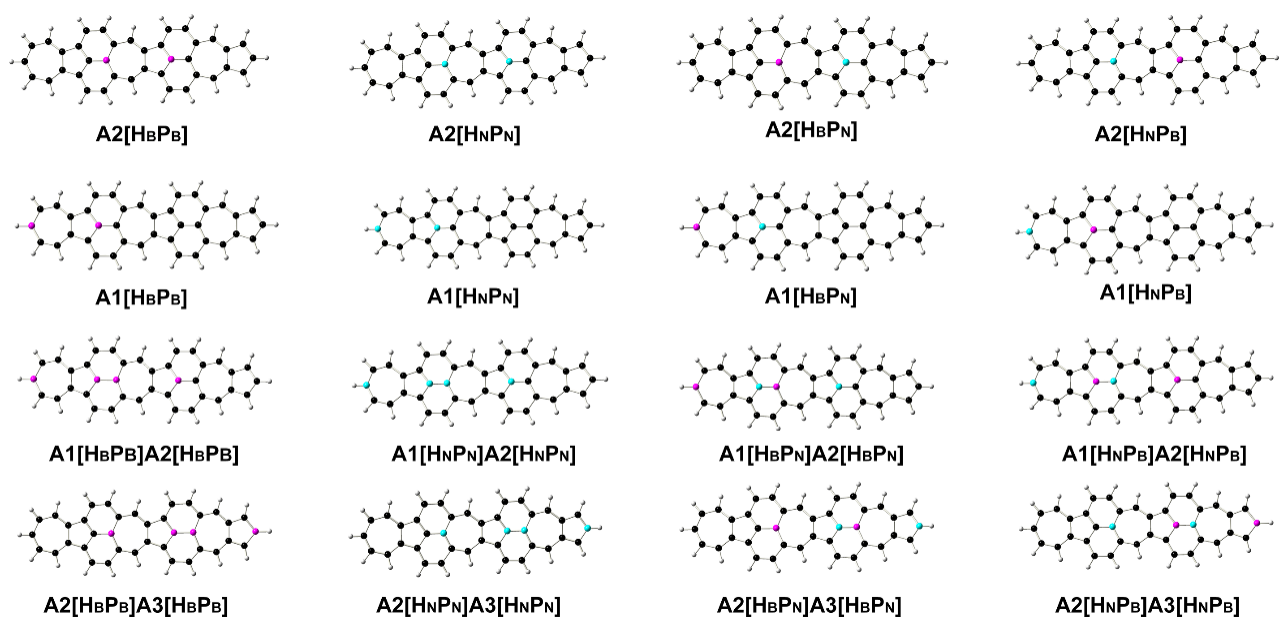

**Figure S1** The structure of B, N doped nanographenes. H or P in square brackets indicates that the carbon atom at the end of a heptagon (H) or pentagon (P) in azulene of A1A2A3 is replaced by B and N atoms.

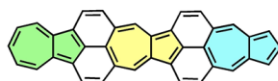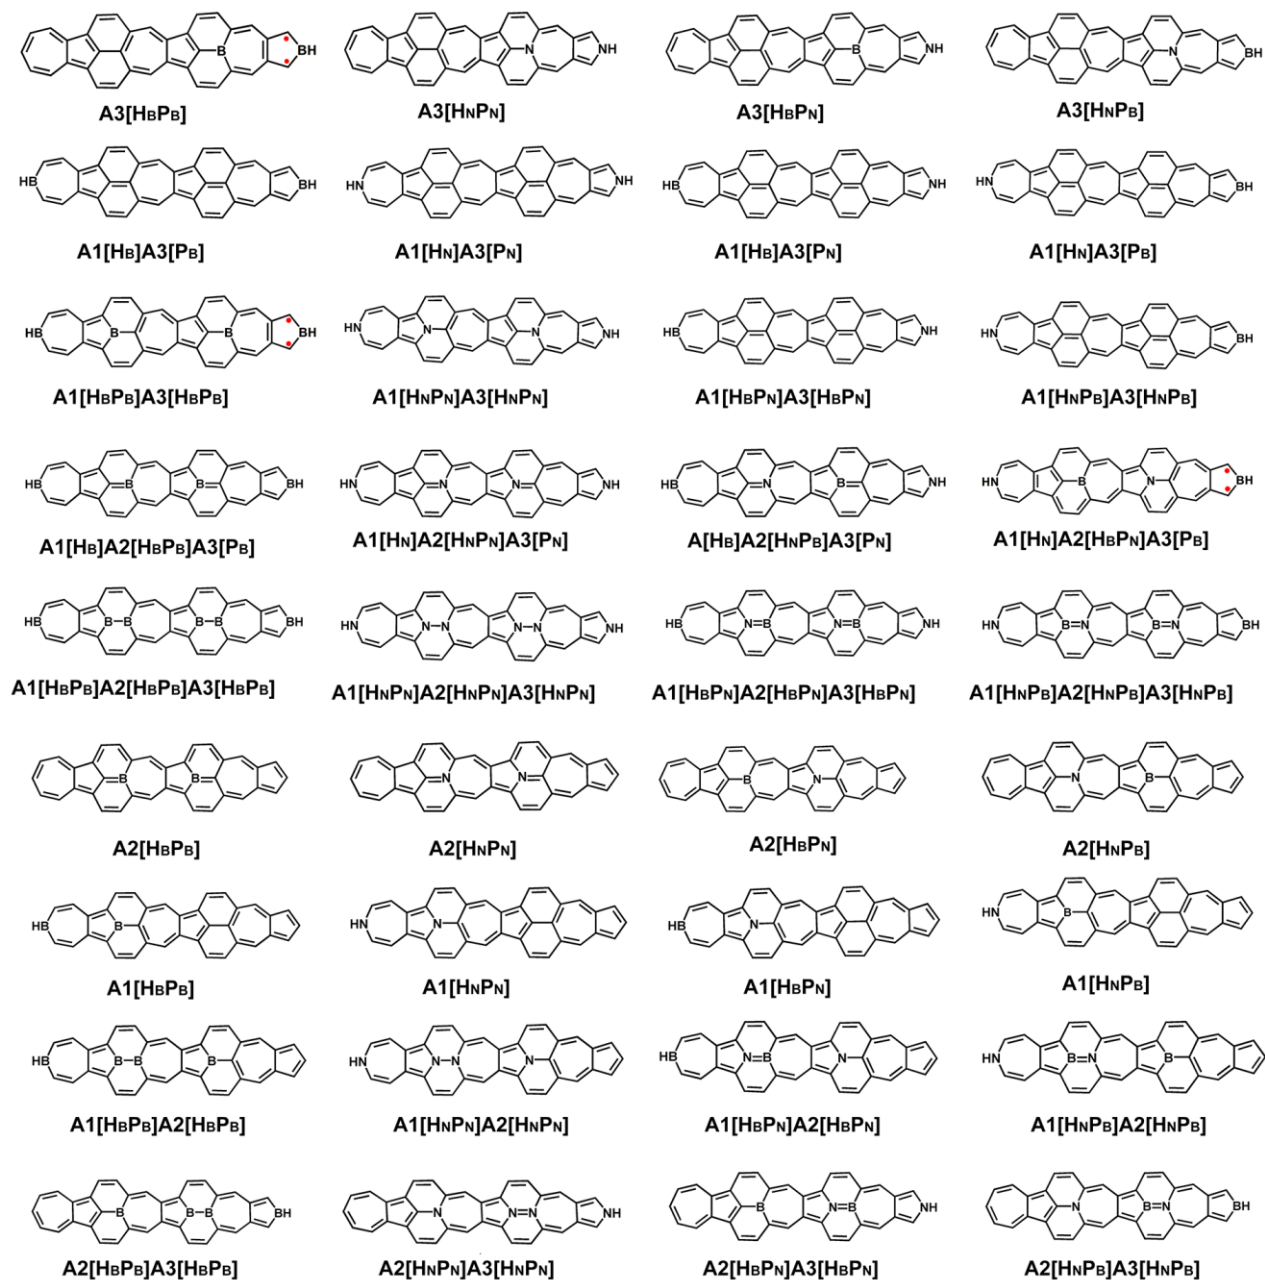

**Figure S2** The proposed Kekulé structures of all investigated molecules according to bond distance and spin distribution.

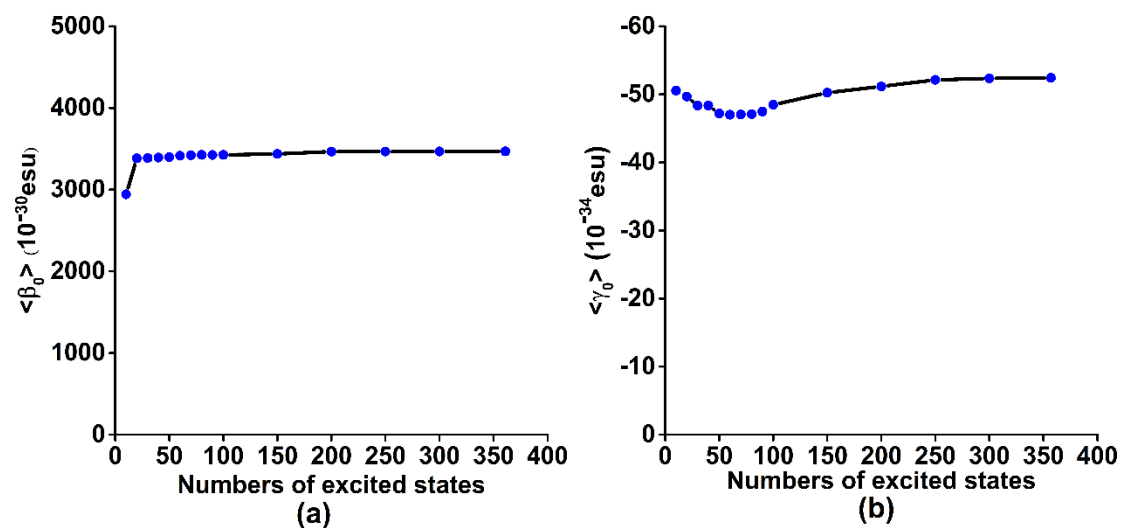

**Figure S3** Evolution of the static first hyperpolarizability ( $\langle\beta_0\rangle$ ) and the static second hyperpolarizability ( $\langle\gamma_0\rangle$ ) with the numbers of excited states in A1[H<sub>N</sub>]A3[P<sub>N</sub>] and A1[H<sub>N</sub>]A2[H<sub>N</sub>P<sub>N</sub>]A3[P<sub>N</sub>], respectively.

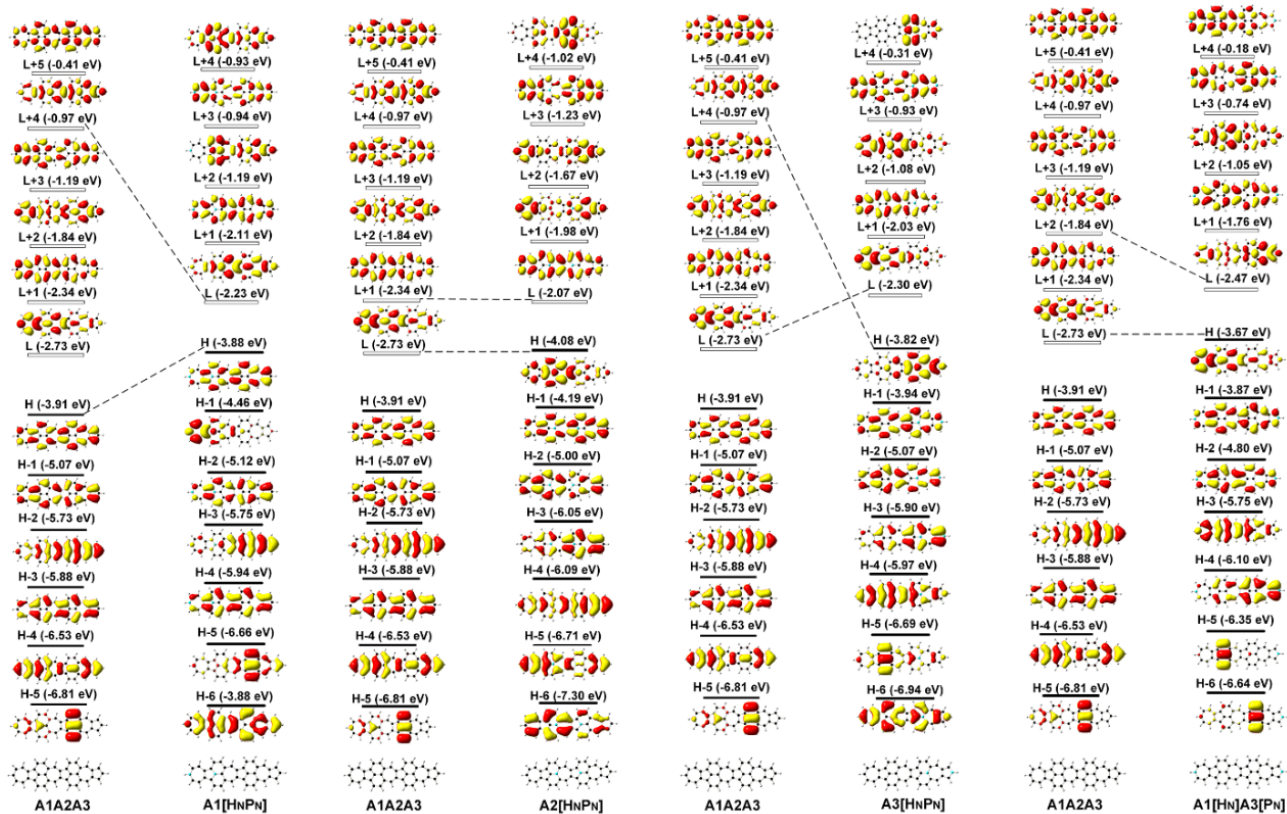

**Figure S4a** The frontier molecular orbitals (H: HOMO; L: LUMO) correlation and energy diagrams of A1A2A3, A2[H<sub>B</sub>P<sub>B</sub>], A2[H<sub>B</sub>P<sub>N</sub>] and A2[H<sub>N</sub>P<sub>N</sub>] predicted with B3LYP/6-31G (d, p).

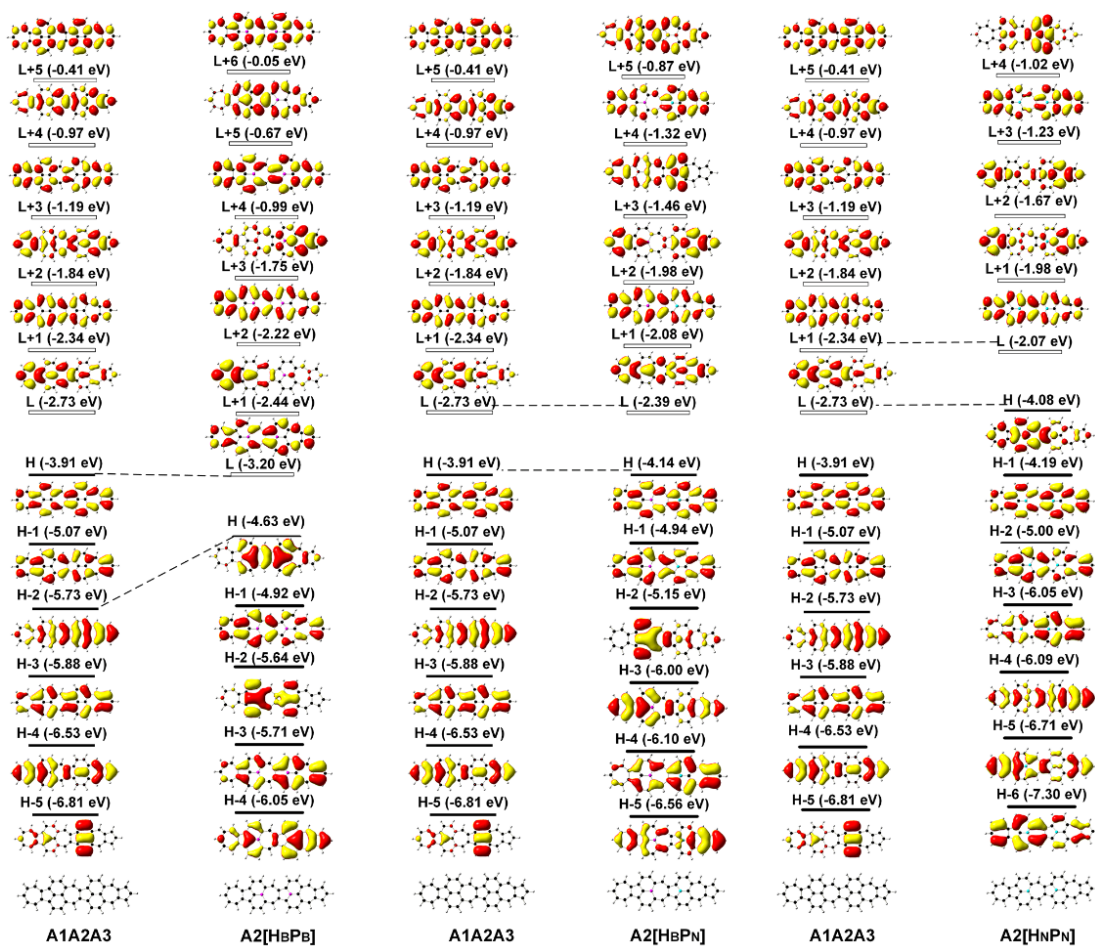

**Figure S4b** The frontier molecular orbitals (H: HOMO; L: LUMO) correlation and energy diagrams of A1A2A3, A1[H<sub>N</sub>P<sub>N</sub>], A2[H<sub>N</sub>P<sub>N</sub>], A3[H<sub>N</sub>P<sub>N</sub>] and A1[H<sub>N</sub>]A3[P<sub>N</sub>] predicted with B3LYP/6-31G (d, p).

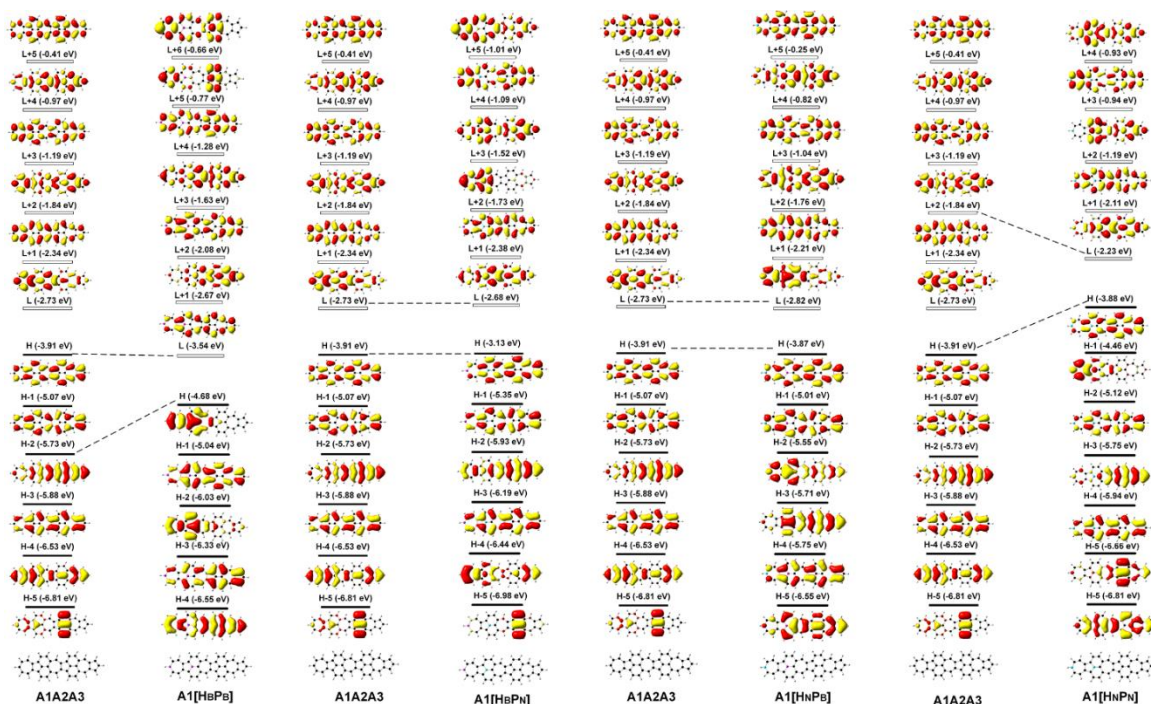

**Figure S4c** The frontier molecular orbitals (H: HOMO; L: LUMO) correlation and energy diagrams of A1A2A3, A1[HbPb], A1[HbPn], A1[HnPb] and A1[HnPn] predicted with B3LYP/6-31G (d, p).

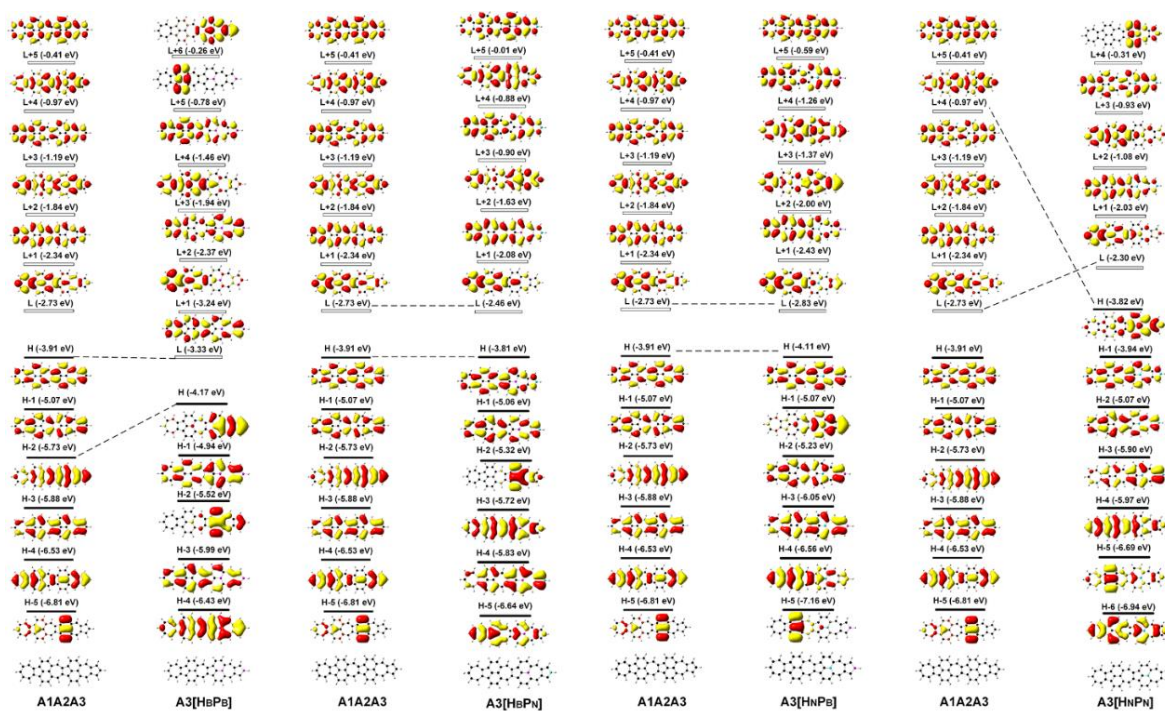

**Figure S4d** The frontier molecular orbitals (H: HOMO; L: LUMO) correlation and energy diagrams of A1A2A3, A3[HbPb], A3[HbPn], A3[HnPb] and A3[HnPn] predicted with B3LYP/6-31G (d, p).



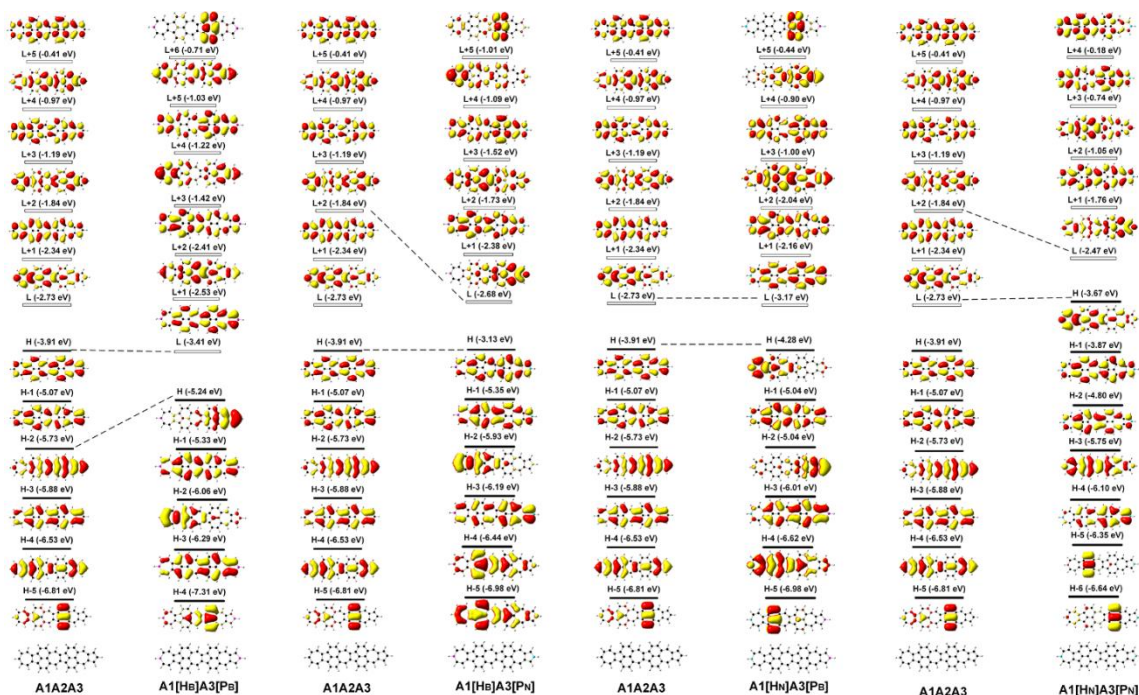

**Figure S4e** The frontier molecular orbitals (H: HOMO; L: LUMO) correlation and energy diagrams of A1A2A3, A1[H<sub>B</sub>]A3[P<sub>B</sub>], A1[H<sub>B</sub>]A3[P<sub>N</sub>], A1[H<sub>N</sub>]A3[P<sub>B</sub>] and A1[H<sub>N</sub>]A3[P<sub>N</sub>] predicted with B3LYP/6-31G (d, p).

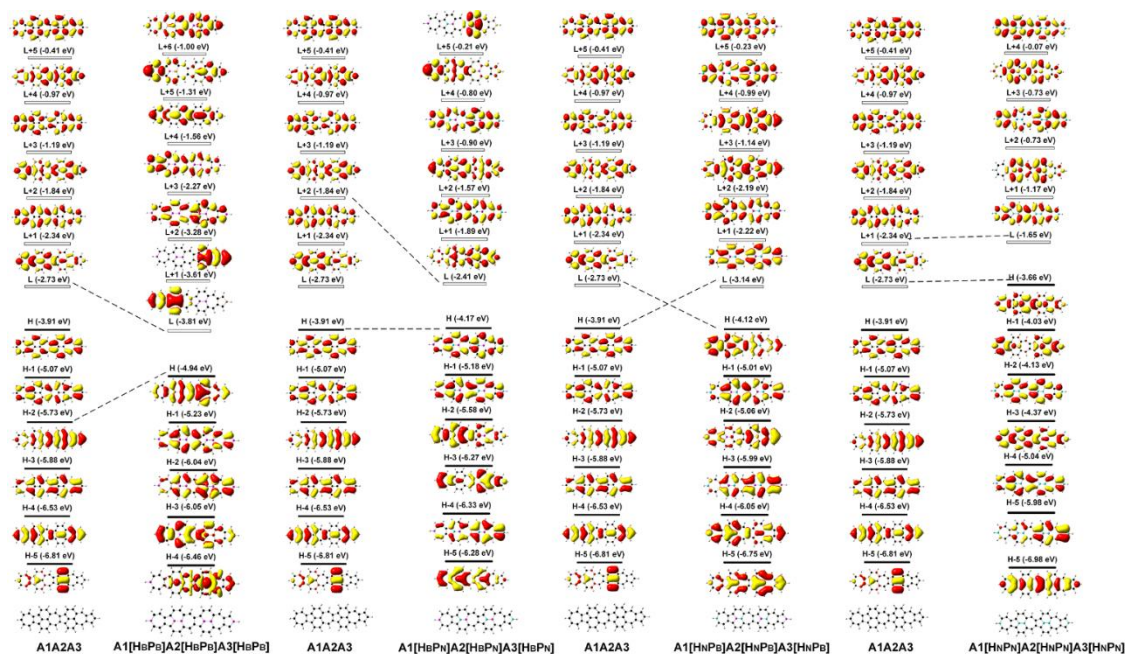

**Figure S4f** The frontier molecular orbitals (H: HOMO; L: LUMO) correlation and energy diagrams of A1A2A3, A1[H<sub>B</sub>P<sub>B</sub>]A2[H<sub>B</sub>P<sub>B</sub>]A3[H<sub>B</sub>P<sub>B</sub>], A1[H<sub>B</sub>P<sub>N</sub>]A2[H<sub>B</sub>P<sub>N</sub>]A3[H<sub>B</sub>P<sub>N</sub>], A1[H<sub>N</sub>P<sub>B</sub>]A2[H<sub>N</sub>P<sub>B</sub>]A3[H<sub>N</sub>P<sub>B</sub>] and A1[H<sub>N</sub>P<sub>N</sub>]A2[H<sub>N</sub>P<sub>N</sub>]A3[H<sub>N</sub>P<sub>N</sub>] predicted with B3LYP/6-31G (d, p).

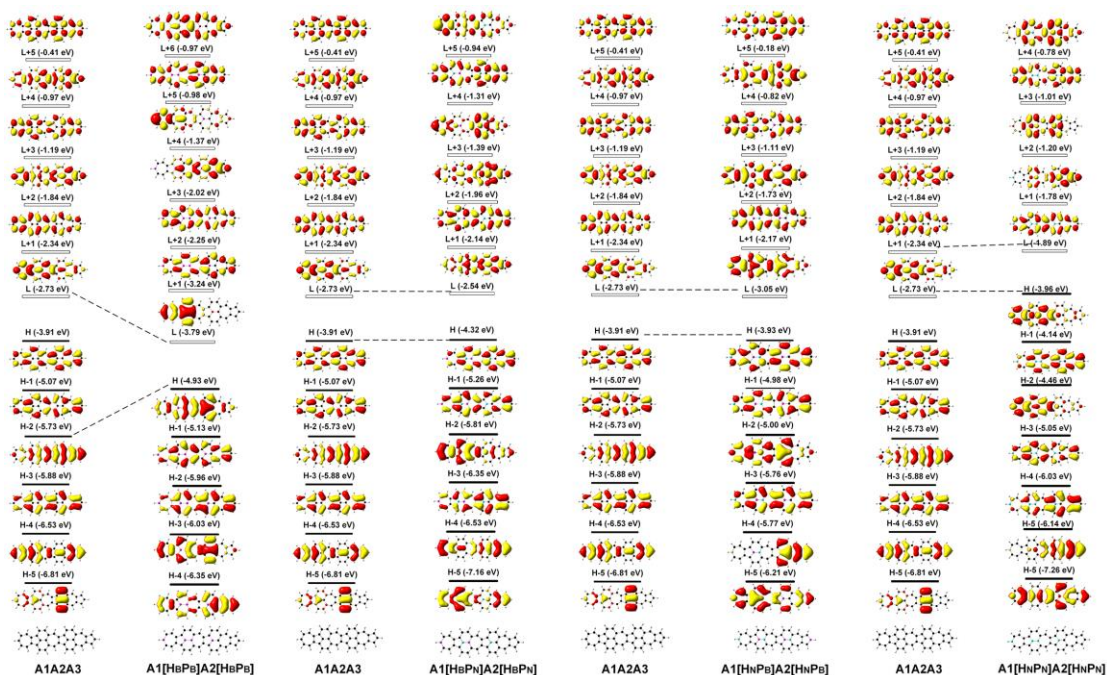

**Figure S4g** The frontier molecular orbitals (H: HOMO; L: LUMO) correlation and energy diagrams of A1A2A3, A1[H<sub>B</sub>P<sub>B</sub>]A2[H<sub>B</sub>P<sub>B</sub>], A1[H<sub>B</sub>P<sub>N</sub>]A2[H<sub>B</sub>P<sub>N</sub>], A1[H<sub>N</sub>P<sub>B</sub>]A2[H<sub>N</sub>P<sub>B</sub>] and A1[H<sub>N</sub>P<sub>N</sub>]A2[H<sub>N</sub>P<sub>N</sub>] predicted with B3LYP/6-31G (d, p).

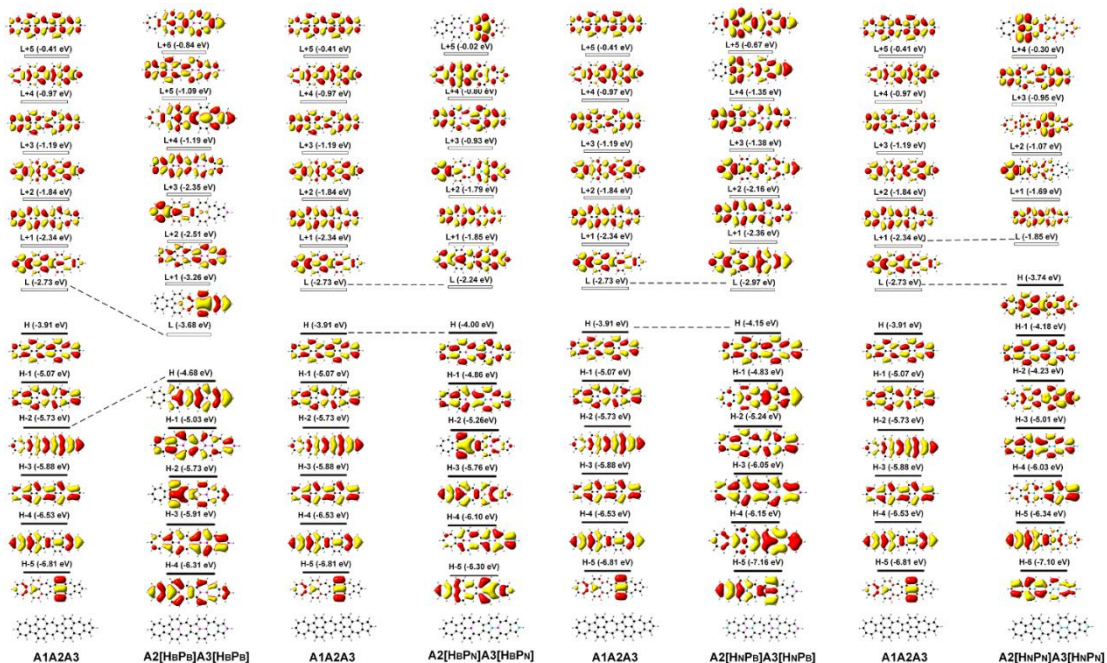

**Figure S4h** The frontier molecular orbitals (H: HOMO; L: LUMO) correlation and energy diagrams of A1A2A3, A2[H<sub>B</sub>P<sub>B</sub>]A3[H<sub>B</sub>P<sub>B</sub>], A2[H<sub>B</sub>P<sub>N</sub>]A3[H<sub>B</sub>P<sub>N</sub>], A2[H<sub>N</sub>P<sub>B</sub>]A3[H<sub>N</sub>P<sub>B</sub>] and A2[H<sub>N</sub>P<sub>N</sub>]A3[H<sub>N</sub>P<sub>N</sub>] predicted with B3LYP/6-31G (d, p).

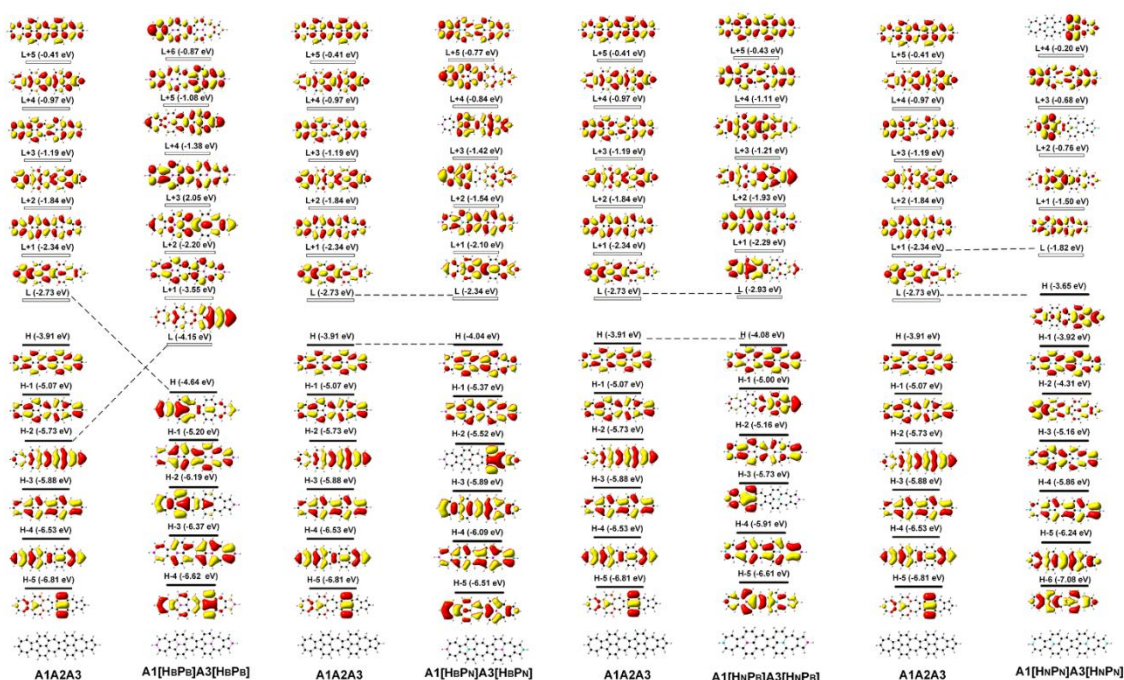

**Figure S4i** The frontier molecular orbitals (H: HOMO; L: LUMO) correlation and energy diagrams of A1A2A3, A1[H<sub>B</sub>P<sub>B</sub>]A3[H<sub>B</sub>P<sub>B</sub>], A1[H<sub>B</sub>P<sub>N</sub>]A3[H<sub>B</sub>P<sub>N</sub>], A1[H<sub>N</sub>P<sub>B</sub>]A3[H<sub>N</sub>P<sub>B</sub>] and A1[H<sub>N</sub>P<sub>N</sub>]A3[H<sub>N</sub>P<sub>N</sub>] predicted with B3LYP/6-31G (d, p).

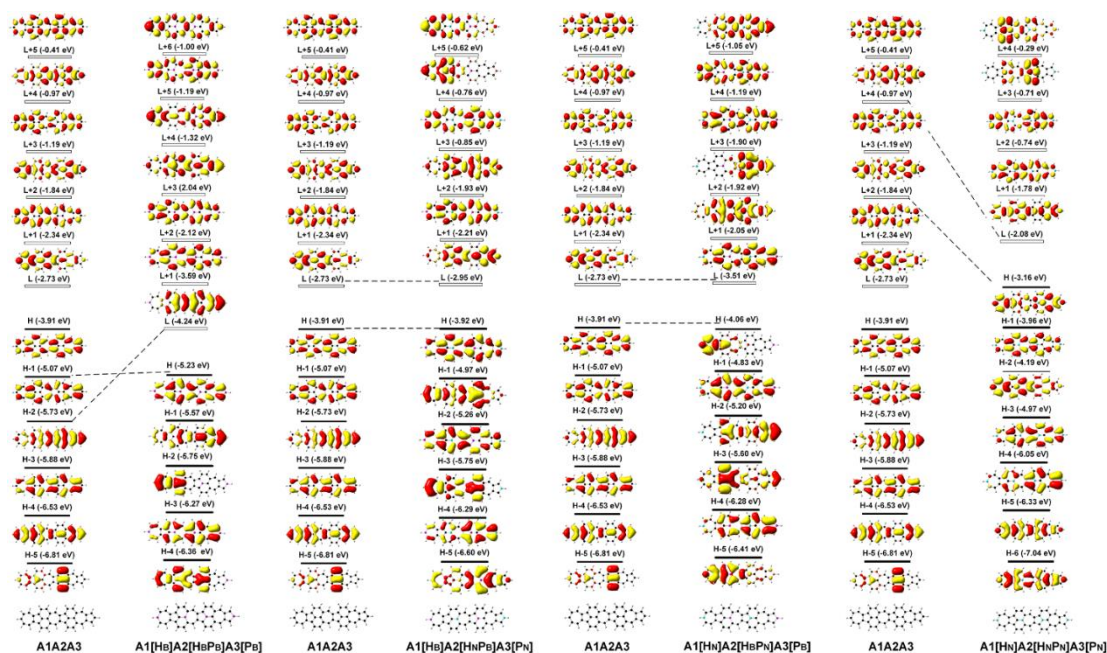

**Figure S4j** The frontier molecular orbitals (H: HOMO; L: LUMO) correlation and energy diagrams of A1A2A3, A1[H<sub>B</sub>]A2[H<sub>B</sub>P<sub>B</sub>]A3[P<sub>B</sub>], A1[H<sub>B</sub>]A2[H<sub>N</sub>P<sub>B</sub>]A3[P<sub>N</sub>], A1[H<sub>N</sub>]A2[H<sub>B</sub>P<sub>N</sub>]A3[P<sub>B</sub>] and A1[H<sub>N</sub>]A2[H<sub>N</sub>P<sub>N</sub>]A3[P<sub>N</sub>] predicted with B3LYP/6-31G (d, p).

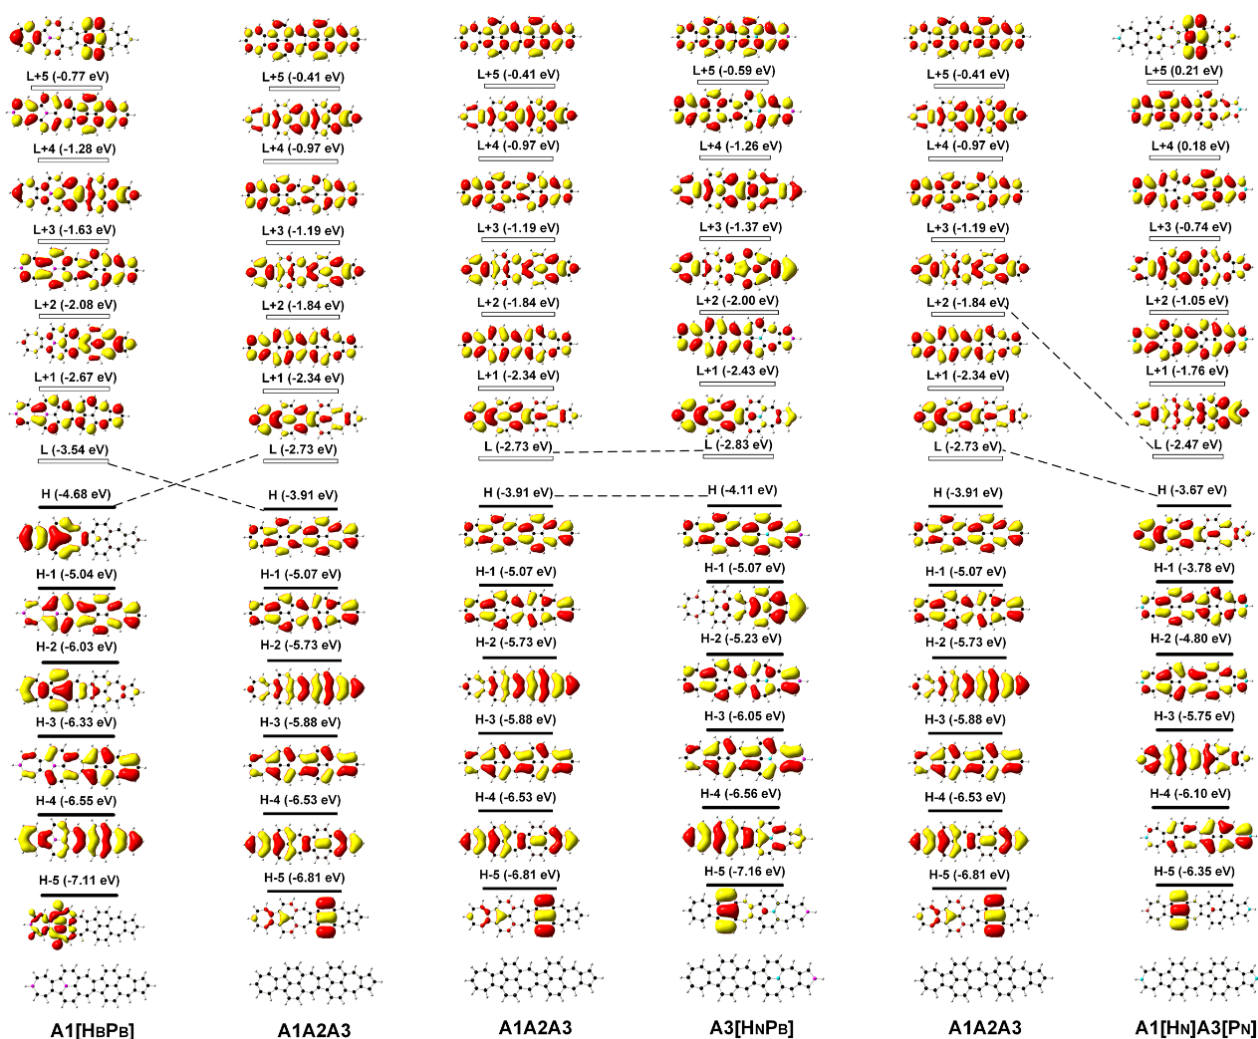

**Figure S5** The frontier molecular orbitals (H: HOMO; L: LUMO) correlation and energy diagrams of A1A2A3, A1[H<sub>B</sub>P<sub>B</sub>], A3[H<sub>B</sub>P<sub>N</sub>] and A1[H<sub>N</sub>]A3[P<sub>N</sub>] predicted with B3LYP/6-31G (d, p).

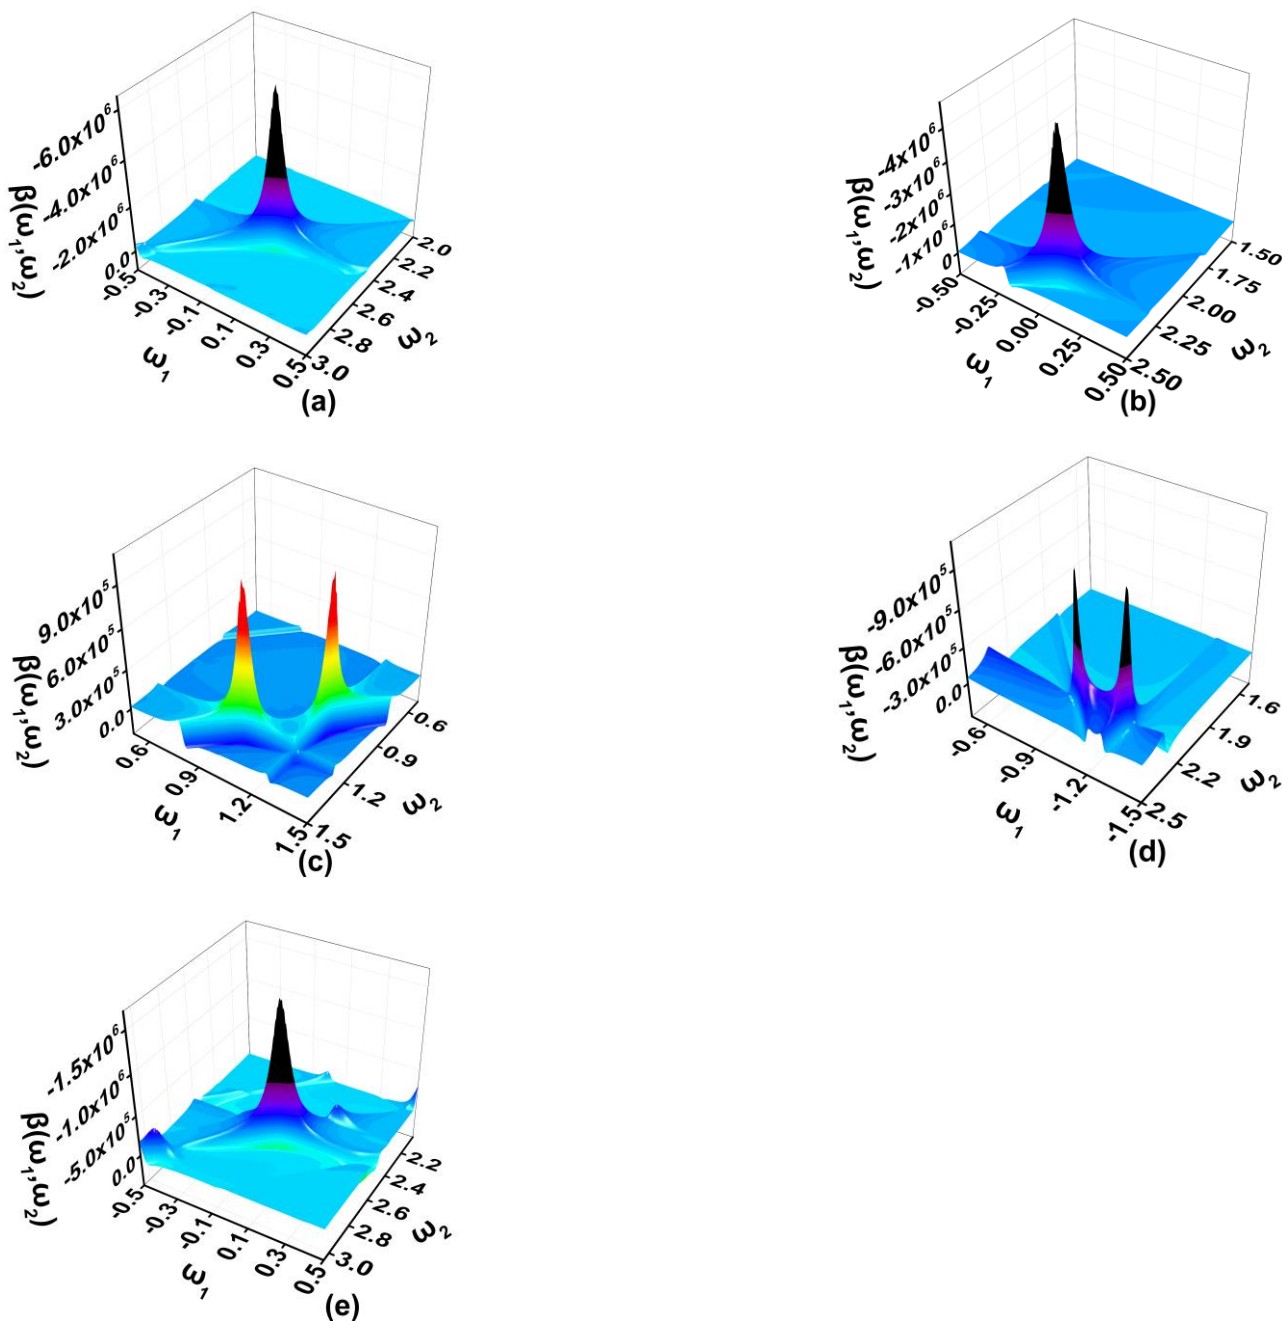

**Figure S6** Two-dimensional second order NLO spectra predicted with TD-CAM-B3LYP/6-31++G (d, p)-SOS [damping coefficients  $\Gamma_m = 0.01 \times \epsilon_m/\epsilon_2$ ] of (a) A3[H<sub>N</sub>P<sub>N</sub>], (b), (c), (d) A1[H<sub>N</sub>]A3[P<sub>N</sub>], and (e) A1[H<sub>N</sub>]A2[H<sub>N</sub>P<sub>N</sub>]A3[P<sub>N</sub>] with step size of 0.005 eV. (a)  $\omega_1$  scanned from  $-0.50$  eV to  $0.50$  eV and  $\omega_2$  scanned from  $2.00$  eV to  $3.00$  eV; (b)  $\omega_1$  scanned from  $-0.50$  eV to  $0.50$  eV and  $\omega_2$  scanned from  $1.50$  eV to  $2.50$  eV; (c)  $\omega_1$  scanned from  $0.50$  eV to  $1.50$  eV and  $\omega_2$  scanned from  $0.50$  eV to  $1.50$  eV; (d)  $\omega_1$  scanned from  $-1.50$  eV to  $-0.50$  eV and  $\omega_2$  scanned from  $1.50$  eV to  $2.50$  eV; (e)  $\omega_1$  scanned from  $-0.50$  eV to  $0.50$  eV and  $\omega_2$  scanned from  $2.00$  eV to  $3.00$  eV.

TPA: a) TPA at 1.80 eV

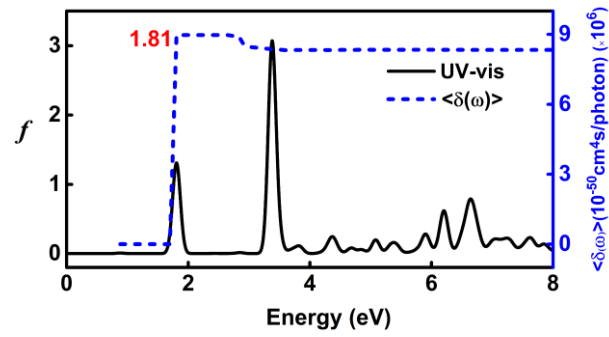

b) TPA at 3.35 eV

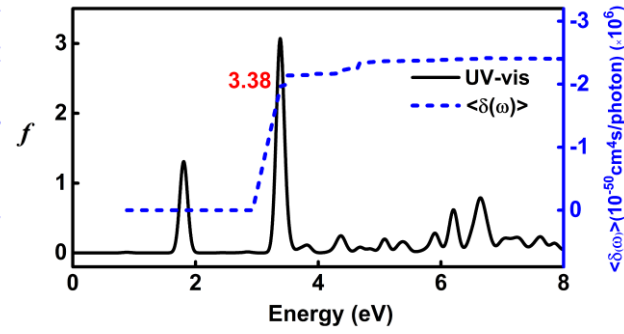

c) TPA at 3.40 eV

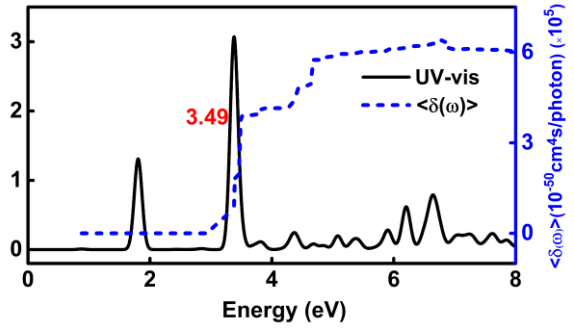

DFWM: a) DFWM at 1.80 eV

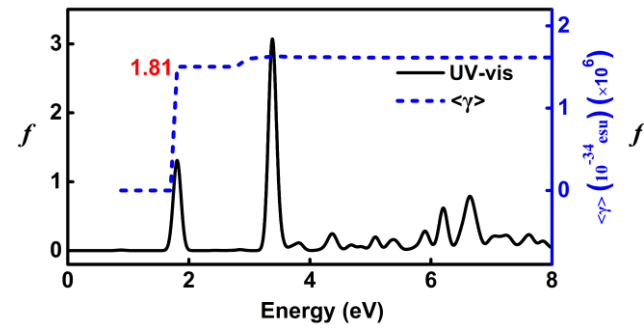

b) DFWM at 3.35 eV

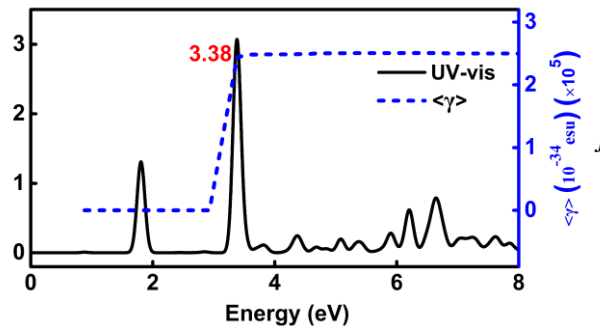

c) DFWM at 3.40 eV

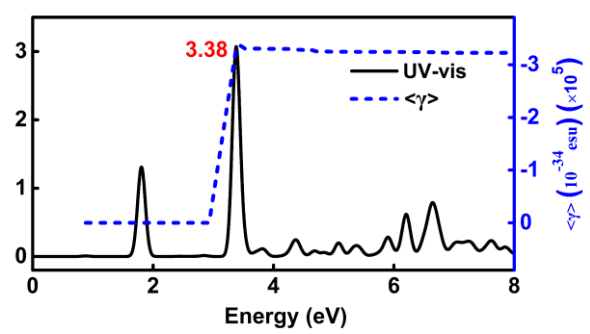

THG: a) THG at 1.75 eV

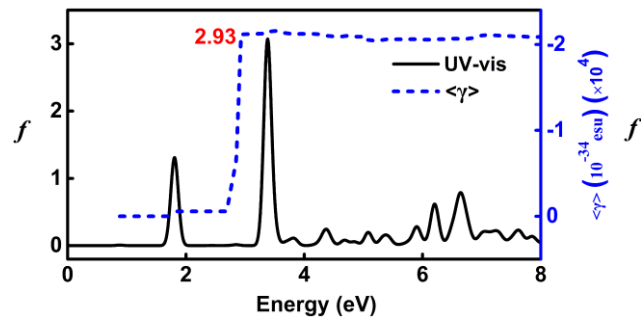

b) THG at 1.80 eV

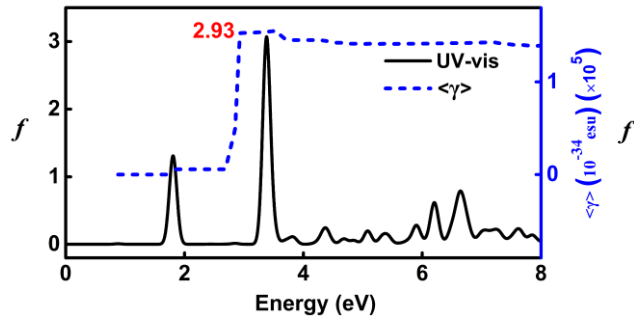

c) THG at 1.85 eV

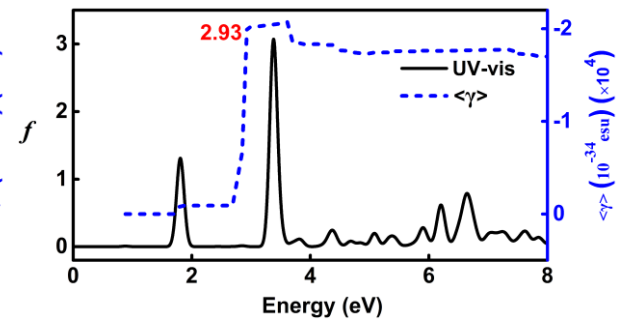

d) THG at 3.40 eV

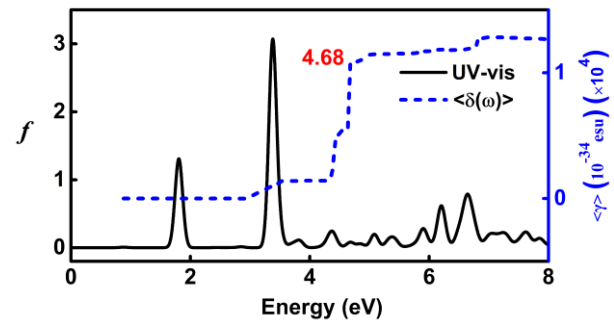

EFISH: a) EFISH at 0.90 eV

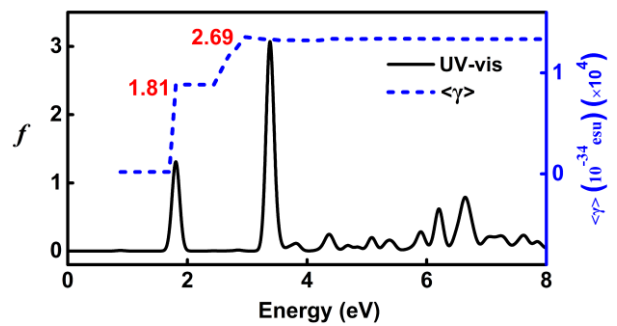

b) EFISH at 1.80 eV

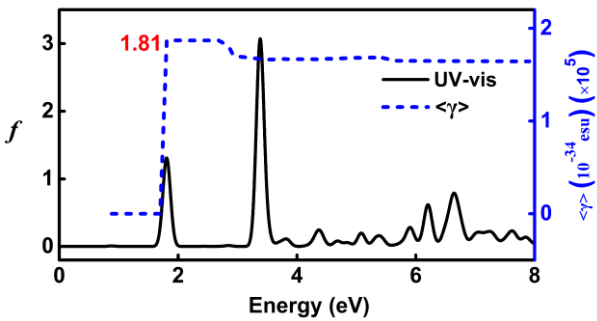

c) EFISH at 3.35 eV

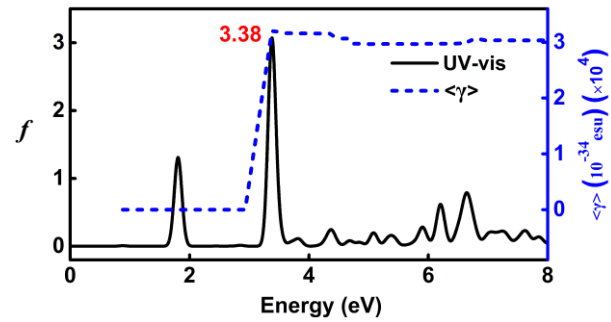

d) EFISH at 3.40 eV

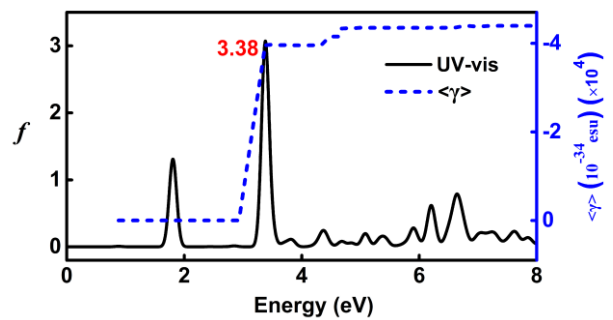

**Figure S7** Evolution of third-order nonlinear optic properties with electronic spectra of A1A2A3 at specific external fields.



TPA: a) TPA at 1.15 eV

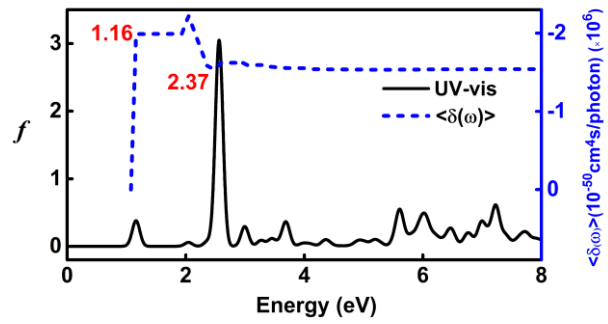

b) TPA at 2.50 eV

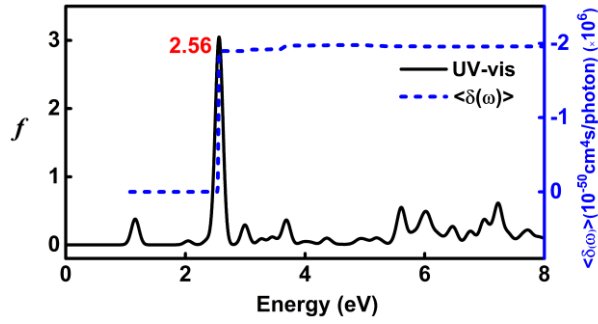

c) TPA at 2.55 eV

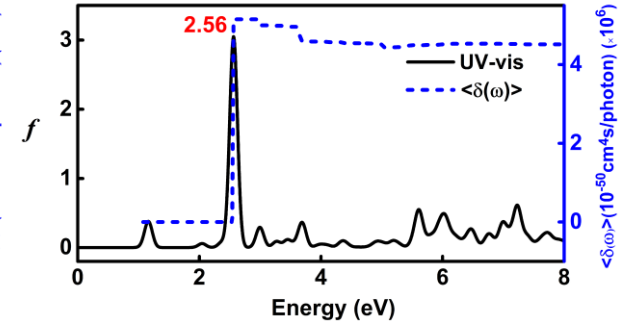

d) TPA at 2.60 eV

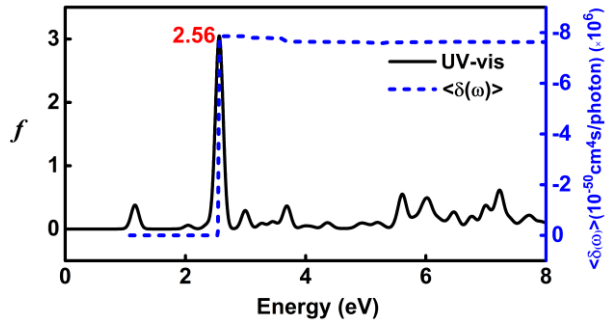

DFWM: a) DFWM at 1.15 eV

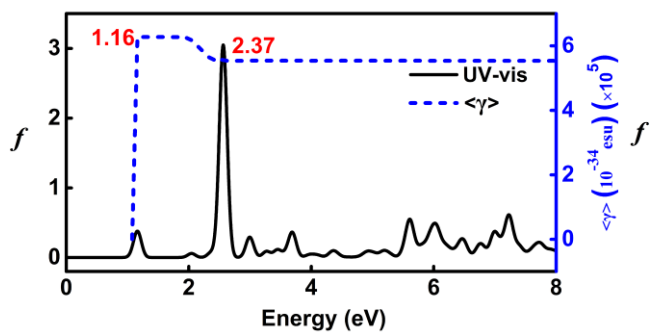

b) DFWM at 2.55 eV

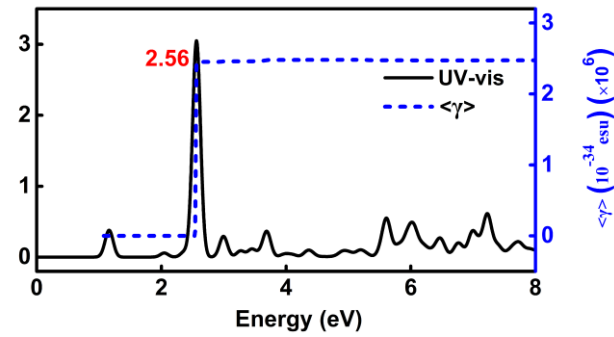

THG: a) THG at 1.05 eV

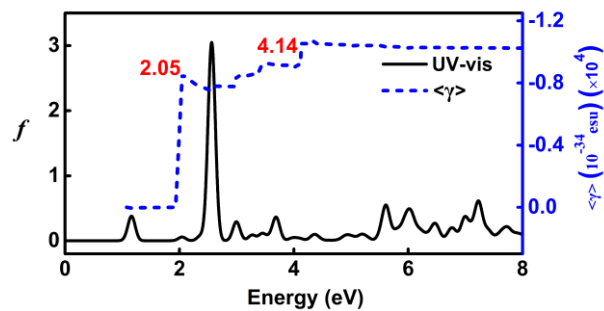

b) THG at 2.55 eV

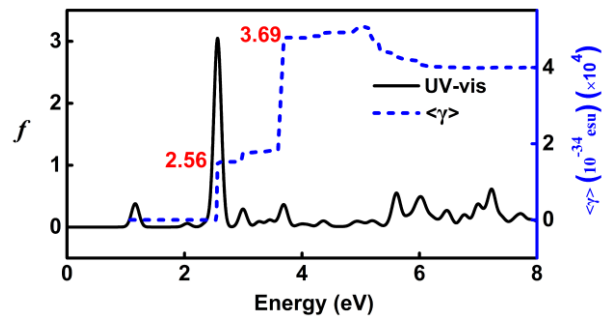

EFISH: a) EFISH at 1.15 eV

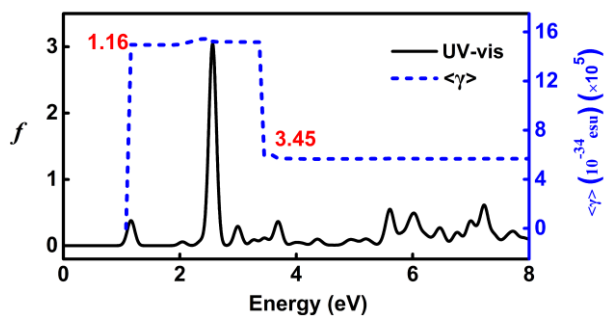

b) EFISH at 2.05 eV

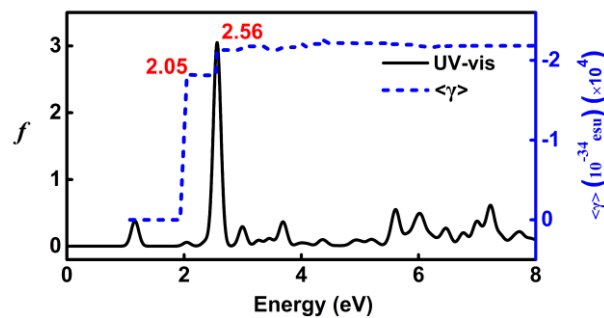

c) EFISH at 2.55 eV

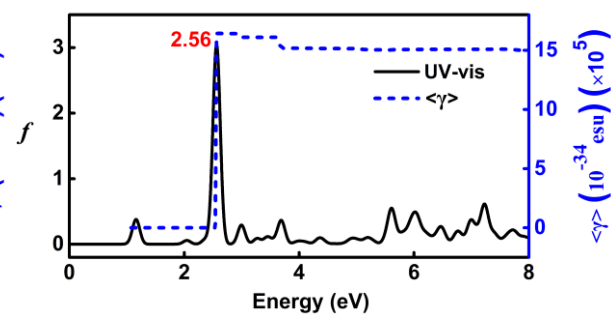

**Figure S8** Evolution of third-order nonlinear optic properties with electronic spectra for A1[H<sub>N</sub>]A2[H<sub>N</sub>P<sub>N</sub>]A3[P<sub>N</sub>] at specific external fields.

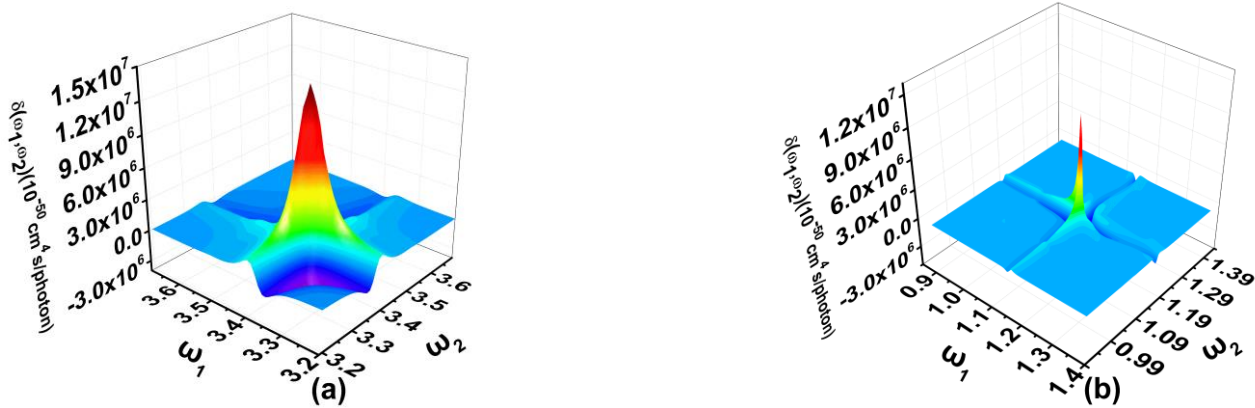

**Figure S9** (a) Fine-scanned TDTPA of A1A2A3 and A1[H<sub>N</sub>]A2[H<sub>N</sub>P<sub>N</sub>]A3[P<sub>N</sub>] from 3.20 eV to 3.70 eV. (b) Fine-scanned TDTPA of A1[H<sub>N</sub>]A2[H<sub>N</sub>P<sub>N</sub>]A3[P<sub>N</sub>] from 0.90 eV to 1.40 eV.

**Table S1** The relative energy ( $\Delta E$  with respect to the most stable isomer  $\Delta E = 0$ , in eV), the lowest vibrational frequency (LVF, in  $\text{cm}^{-1}$ ), energy gap ( $E_{\text{gap}}$ , in eV) between the HOMO ( $E_{\text{H}}$ , in eV) and the LUMO ( $E_{\text{L}}$ , in eV), the static first and second hyperpolarizability ( $\langle\beta_0\rangle$  and  $\langle\gamma_0\rangle$ ), the  $\langle\beta_0\rangle$  (in  $10^{-30}$  esu) and  $\langle\gamma_0\rangle$  (in  $10^{-34}$  esu) per heavy atom ( $\langle\beta_0\rangle/N$  and  $\langle\gamma_0\rangle/N$ ) of A1A2A3 and its N-doped series of molecules in closed-shell singlet predicted with B3LYP/6-31G (d, p) and TD-CAM-B3LYP/6-31++G (d, p)-SOS, respectively. The relative electronic energy differences ( $\Delta E_{\text{OS-CS}}$  and  $\Delta E_{\text{T-CS}}$ , in kcal/mol) between open-shell singlet (OS) or triplet (T) and closed-shell singlet (CS) (CS is taken as reference), and spin contamination of open-shell singlet ( $\langle S^2 \rangle_{\text{OS}}$ ) obtained at the UB3LYP/6-31G (d, p) level.

| Compounds                                                                                  | $\Delta E$<br>(eV) | LVF<br>( $\text{cm}^{-1}$ ) | $\Delta E_{\text{OS-CS}}$<br>(Kcal/mol) | $\Delta E_{\text{T-CS}}$<br>(Kcal/mol) | $\langle S^2 \rangle_{\text{OS}}$ | $E_{\text{H}}$<br>(eV) | $E_{\text{L}}$<br>(eV) | $E_{\text{gap}}$<br>(eV) | $D_{\text{g}}/\text{Debye}$ | $\langle\beta_0\rangle/(\langle\beta_0\rangle/N)$<br>( $10^{-30}$ esu) | $\langle\gamma_0\rangle/(\langle\gamma_0\rangle/N)$<br>( $10^{-30}$ esu) | $\langle\gamma_0\rangle_{3\text{L}}/\langle\gamma_0\rangle_{4\text{L}}$<br>( $10^{-34}$ esu) |
|--------------------------------------------------------------------------------------------|--------------------|-----------------------------|-----------------------------------------|----------------------------------------|-----------------------------------|------------------------|------------------------|--------------------------|-----------------------------|------------------------------------------------------------------------|--------------------------------------------------------------------------|----------------------------------------------------------------------------------------------|
| A1A2A3                                                                                     | /                  | 16.98                       | 0.00                                    | 6.03                                   | 0.00                              | -3.91                  | -2.73                  | 1.18                     | 6.48                        | 1808.94/47.60                                                          | -21.74/-0.57                                                             | -34.77/13.03                                                                                 |
| A1[H <sub>B</sub> P <sub>B</sub> ] (C <sub>2V</sub> )                                      | 0.95               | 15.87                       | 0.00                                    | 11.13                                  | 0.00                              | -4.68                  | -3.54                  | 1.13                     | 11.93                       | 1151.11/30.29                                                          | -22.37/-0.59                                                             | -39.97/17.60                                                                                 |
| A2[H <sub>B</sub> P <sub>B</sub> ] (C <sub>2V</sub> )                                      | 0.91               | 15.12                       | 0.00                                    | 8.79                                   | 0.00                              | -4.63                  | -3.20                  | 1.43                     | 3.42                        | 123.52/3.25                                                            | -11.17/-0.03                                                             | -28.77/17.60                                                                                 |
| A1[H <sub>B</sub> P <sub>B</sub> ]A2[H <sub>B</sub> P <sub>B</sub> ] (C <sub>S</sub> )     | 1.24               | 9.42                        | -0.71                                   | 9.52                                   | 0.21                              | -4.93                  | -3.79                  | 1.14                     | 3.11                        | /                                                                      | /                                                                        | /                                                                                            |
| A2[H <sub>B</sub> P <sub>B</sub> ]A3[H <sub>B</sub> P <sub>B</sub> ] (C <sub>S</sub> )     | 1.09               | 16.57                       | -2.55                                   | 0.41                                   | 0.87                              | -4.71                  | -3.49                  | 1.22                     | 6.14                        | /                                                                      | /                                                                        | /                                                                                            |
| A1[H <sub>B</sub> P <sub>N</sub> ] (C <sub>2V</sub> )                                      | 0.13               | 16.86                       | 0.00                                    | 10.89                                  | 0.00                              | -4.13                  | -2.68                  | 1.45                     | 0.65                        | 683.83/17.99                                                           | -13.08/-0.34                                                             | -26.70/13.62                                                                                 |
| A1[H <sub>N</sub> P <sub>B</sub> ] (C <sub>2V</sub> )                                      | 1.40               | 16.85                       | 0.00                                    | 1.85                                   | 0.00                              | -3.87                  | -2.82                  | 1.05                     | 10.66                       | /                                                                      | /                                                                        | /                                                                                            |
| A2[H <sub>B</sub> P <sub>N</sub> ] (C <sub>2V</sub> )                                      | 0.29               | 16.61                       | 0.00                                    | 18.71                                  | 0.00                              | -4.14                  | -2.39                  | 1.75                     | 0.71                        | 1.77/0.05                                                              | -4.91/-0.13                                                              | -17.70/12.79                                                                                 |
| A2[H <sub>N</sub> P <sub>B</sub> ] (C <sub>2V</sub> )                                      | 2.04               | 14.66                       | -0.01                                   | 3.73                                   | 0.00                              | -3.99                  | -2.85                  | 1.14                     | 8.7                         | /                                                                      | /                                                                        | /                                                                                            |
| A1[H <sub>B</sub> P <sub>N</sub> ]A2[H <sub>B</sub> P <sub>N</sub> ] (C <sub>2V</sub> )    | 0.11               | 16.84                       | 0.00                                    | 17.68                                  | 0.00                              | -4.32                  | -2.54                  | 1.78                     | 6.24                        | 326.51/8.59                                                            | -5.03/-0.13                                                              | -16.06/11.03                                                                                 |
| A1[H <sub>N</sub> P <sub>B</sub> ]A2[H <sub>N</sub> P <sub>B</sub> ] (C <sub>2V</sub> )    | 3.14               | 14.89                       | -6.12                                   | -4.32                                  | 1.21                              | -3.93                  | -3.05                  | 0.88                     | 12.65                       | /                                                                      | /                                                                        | /                                                                                            |
| A2[H <sub>B</sub> P <sub>N</sub> ]A3[H <sub>B</sub> P <sub>N</sub> ] (C <sub>2V</sub> )    | 0.00               | 16.34                       | 0.00                                    | 16.69                                  | 0.00                              | 4.00                   | -2.24                  | 1.76                     | 7.24                        | 90.91/2.39                                                             | -4.47/-0.12                                                              | -15.70/11.23                                                                                 |
| A2[H <sub>N</sub> P <sub>B</sub> ]A3[H <sub>N</sub> P <sub>B</sub> ] (C <sub>2V</sub> )    | 3.10               | 15.56                       | -1.44                                   | 2.81                                   | 0.63                              | -4.15                  | -2.97                  | 1.18                     | 13.20                       | /                                                                      | /                                                                        | /                                                                                            |
| A1[H <sub>B</sub> ]A2[H <sub>N</sub> P <sub>B</sub> ]A3[P <sub>N</sub> ] (C <sub>S</sub> ) | 3.38               | 14.52                       | -0.78                                   | 1.26                                   | 0.43                              | -3.92                  | -2.95                  | 0.97                     | 15.13                       | /                                                                      | /                                                                        | /                                                                                            |
| A1[H <sub>N</sub> ]A2[H <sub>B</sub> P <sub>N</sub> ]A3[P <sub>B</sub> ] (C <sub>S</sub> ) | 3.33               | 16.56                       | 0.00                                    | -9.14                                  | 0.00                              | -4.02                  | -3.45                  | 0.58                     | 5.36                        | /                                                                      | /                                                                        | /                                                                                            |
| A1[H <sub>N</sub> P <sub>N</sub> ] (C <sub>2V</sub> )                                      | 0.00               | 17.15                       | 0.00                                    | 13.77                                  | 0.00                              | -3.88                  | -2.23                  | 1.64                     | 8.19                        | -139.91/-3.68                                                          | -6.71/-0.18                                                              | -23.66/16.94                                                                                 |
| A2[H <sub>N</sub> P <sub>N</sub> ] (C <sub>2V</sub> )                                      | 0.75               | 14.37                       | 0.00                                    | 18.91                                  | 0.00                              | -4.08                  | -2.07                  | 2.01                     | 2.66                        | -951.47/-25.04                                                         | 1.43/0.04                                                                | -18.65/20.08                                                                                 |
| A1[H <sub>N</sub> P <sub>N</sub> ]A2[H <sub>N</sub> P <sub>N</sub> ] (C <sub>2V</sub> )    | 1.47               | 14.03                       | 0.00                                    | 20.53                                  | 0.00                              | -3.96                  | -1.89                  | 2.07                     | 4.70                        | -803.74/-21.15                                                         | -4.38/-0.12                                                              | -11.78/7.40                                                                                  |
| A2[H <sub>N</sub> P <sub>N</sub> ]A3[H <sub>N</sub> P <sub>N</sub> ] (C <sub>2V</sub> )    | 1.92               | 13.72                       | 0.00                                    | 16.61                                  | 0.00                              | -3.74                  | -1.85                  | 1.89                     | 3.60                        | -341.59/-8.99                                                          | -2.24/-0.06                                                              | -8.26/6.40                                                                                   |

**Table S2** Major absorption peaks with transition nature in azulene-based molecules ( $f$  is the oscillator strength in the arbitrary unit,  $E$  is the transition energy in eV unit,  $\lambda$  is the wavelength in nm unit, TNMC to  $\langle\beta_0\rangle$  is the transition nature of electron excitation with a major contribution to  $\langle\beta_0\rangle$ ,  $\langle\beta_0\rangle_{\text{con}}$  is contribution value to  $\langle\beta_0\rangle$  in  $10^{-30}$  esu).

| Compounds                                                                | $f$    | $E$  | $\lambda$ | Transition                     | TNMC to $\langle\beta_0\rangle$      | $\langle\beta_0\rangle_{\text{con}}$ |
|--------------------------------------------------------------------------|--------|------|-----------|--------------------------------|--------------------------------------|--------------------------------------|
| A3[H <sub>N</sub> P <sub>N</sub> ]                                       | 2.9897 | 2.52 | 492.90    | S <sub>0</sub> →S <sub>5</sub> | H-1→L+1<br>(49.4%)<br>H→L<br>(46.5%) | 2498.26                              |
| A1[H <sub>N</sub> ]A3[P <sub>N</sub> ]                                   | 2.3376 | 2.31 | 536.03    | S <sub>0</sub> →S <sub>5</sub> | H-1→L+1<br>(52.0%)<br>H→L<br>(41.9%) | 2706.72                              |
| A1[H <sub>N</sub> ]A2[H <sub>N</sub> P <sub>N</sub> ]A3[P <sub>N</sub> ] | 0.3753 | 1.16 | 1067.72   | S <sub>0</sub> →S <sub>2</sub> | H→L<br>(81.2%)<br>H-1→L+1<br>(17.8%) | 1156.25                              |
|                                                                          | 3.0497 | 2.56 | 483.88    | S <sub>0</sub> →S <sub>9</sub> | H-1→L+1<br>(72.9%)<br>H→L<br>(20.4%) | 847.17                               |

**Table S3** Calculated important parameters of  $(\beta_{ijk})_m$  [ $i, j, k \in (x, y, z)$ ] ( $\times 10^{-30}$  esu) of azulene-based molecules. The  $(\beta_{ijk})_m$  is the first hyperpolarizability tensor of the  $m$ th excited state ( $S_m$ ) with a major contribution to the static first hyperpolarizability ( $\langle\beta_0\rangle$ ),  $m = 0$  is the ground state, and  $m > 0$  is the  $m$ th excited state.

| Structures<br>( $\langle\beta_0\rangle$ )                                                 | $(\beta_{zzz})_m$ | $(\beta_{yyy})_m$ | $(\beta_{xxx})_m$ | $S_m$                                                              | $E_m$ | State dipole moment |      |       |       | Transition dipole moment |      |       |       |
|-------------------------------------------------------------------------------------------|-------------------|-------------------|-------------------|--------------------------------------------------------------------|-------|---------------------|------|-------|-------|--------------------------|------|-------|-------|
|                                                                                           |                   |                   |                   |                                                                    |       | X                   | Y    | Z     | tot   | X                        | Y    | Z     | tot   |
| A3[H <sub>N</sub> P <sub>N</sub> ]<br>(3002.80)                                           | -2579.90          | 0.00              | 0.00              | S <sub>0</sub><br>S <sub>5</sub> [S <sub>0</sub> →S <sub>5</sub> ] | 2.52  | 0.00                | 0.00 | -1.40 | 1.40  | 0.00                     | 0.00 | 17.72 | 17.72 |
| A1[H <sub>N</sub> ]A3[P <sub>N</sub> ]<br>(3469.37)                                       | 2899.75           | 0.00              | 0.00              | S <sub>0</sub><br>S <sub>5</sub> [S <sub>0</sub> →S <sub>5</sub> ] | 2.31  | 0.00                | 0.00 | 10.35 | 10.35 | 0.00                     | 0.00 | 16.34 | 16.34 |
| A1[H <sub>N</sub> ]A2[H <sub>N</sub> P <sub>N</sub> ]A3<br>[P <sub>N</sub> ]<br>(2106.08) | 1156.25           | 0.00              | 0.00              | S <sub>0</sub><br>S <sub>2</sub> [S <sub>0</sub> →S <sub>2</sub> ] | 1.16  | 0.00                | 0.00 | 5.54  | 5.54  | 0.00                     | 0.00 | -9.24 | 9.24  |
|                                                                                           | 847.17            | 0.00              | 0.00              | S <sub>0</sub><br>S <sub>9</sub> [S <sub>0</sub> →S <sub>9</sub> ] | 2.56  | 0.00                | 0.00 | -2.28 | 2.28  | 0.00                     | 0.00 | 17.73 | 17.73 |
| A1A2A3<br>(1808.94)                                                                       | -1205.81          | 0.00              | 0.00              | S <sub>0</sub><br>S <sub>3</sub> [S <sub>0</sub> →S <sub>3</sub> ] | 1.81  | 0.00                | 0.00 | -2.03 | 2.03  | 0.00                     | 0.00 | 14.11 | 14.11 |
|                                                                                           | -470.71           | 0.00              | 0.00              | S <sub>0</sub><br>S <sub>8</sub> [S <sub>0</sub> →S <sub>8</sub> ] | 3.38  | 0.00                | 0.00 | -7.99 | 7.99  | 0.00                     | 0.00 | 15.49 | 15.49 |

(1) A3[H<sub>N</sub>P<sub>N</sub>]:

$$\beta_{zzz}[S_0 \rightarrow S_5] = 6 \times \frac{17.72 \times [20.16 - (-1.40)] \times (-17.72)}{2.52^2} \times \frac{(10^{-18})^3}{(1.602 \times 10^{-12})^2} \text{esu} = -2492.31 \times 10^{-30} \text{esu}$$

(2) A1[H<sub>N</sub>]A3[P<sub>N</sub>]:

$$\beta_{zzz}[S_0 \rightarrow S_5] = 6 \times \frac{16.34 \times [(-12.86) - 10.35] \times (-16.34)}{2.31^2} \times \frac{(10^{-18})^3}{(1.602 \times 10^{-12})^2} \text{esu} = 2715.07 \times 10^{-30} \text{esu}$$

(3) A1[H<sub>N</sub>]A2[H<sub>N</sub>P<sub>N</sub>]A3[P<sub>N</sub>]:

$$\beta_{zzz}[S_0 \rightarrow S_2] = 6 \times \frac{(-9.24) \times [(-2.28) - 5.54] \times 9.24}{1.16^2} \times \frac{(10^{-18})^3}{(1.602 \times 10^{-12})^2} \text{esu} = 1160.01 \times 10^{-30} \text{esu}$$

$$\beta_{zzz}[S_0 \rightarrow S_9] = 6 \times \frac{17.73 \times [(-2.03) - 5.54] \times (-17.73)}{2.56^2} \times \frac{(10^{-18})^3}{(1.602 \times 10^{-12})^2} \text{esu} = 848.91 \times 10^{-30} \text{esu}$$

(4) A1A2A3:

$$\beta_{zzz}[S_0 \rightarrow S_3] = 6 \times \frac{14.11 \times [0.46 - (-7.99)] \times (-14.11)}{1.81^2} \times \frac{(10^{-18})^3}{(1.602 \times 10^{-12})^2} \text{esu} = -1200.55 \times 10^{-30} \text{esu}$$

$$\beta_{zzz}[S_0 \rightarrow S_8] = 6 \times \frac{15.49 \times [1.59 - (-7.99)] \times (-15.49)}{3.38^2} \times \frac{(10^{-18})^3}{(1.602 \times 10^{-12})^2} \text{esu} = -470.39 \times 10^{-30} \text{esu}$$

**Table S4** Major electron excitations with transition nature in A1[H<sub>N</sub>]A3[P<sub>N</sub>], A1[H<sub>N</sub>]A2[H<sub>N</sub>P<sub>N</sub>]A3[P<sub>N</sub>] and A1A2A3. The *f* is the oscillator strength,  $\lambda$  is the wavelength, and TNMC to  $\langle\gamma_0\rangle_{3L}$  is the transition nature of electron excitation with a major contribution to  $\langle\gamma_0\rangle_{3L}$ .

| Compounds                                                                | <i>f</i> | E    | $\lambda$ | Transition                      | TNMC to $\langle\gamma_0\rangle_{3L}$ | $[\langle\gamma_0\rangle_{3L}]_{con}$ |
|--------------------------------------------------------------------------|----------|------|-----------|---------------------------------|---------------------------------------|---------------------------------------|
| A1[H <sub>N</sub> ]A3[P <sub>N</sub> ]                                   | 2.34     | 2.31 | 536.03    | S <sub>0</sub> →S <sub>5</sub>  | H→L+1 (52.0%)<br>H→L (41.9%)          | -10.67                                |
|                                                                          | 1.83     | 3.27 | 378.94    | S <sub>0</sub> →S <sub>10</sub> | H→L+2 (35.8%)<br>H→L (29.6%)          | -6.62                                 |
| A1[H <sub>N</sub> ]A2[H <sub>N</sub> P <sub>N</sub> ]A3[P <sub>N</sub> ] | 0.3753   | 1.16 | 1067.72   | S <sub>0</sub> →S <sub>2</sub>  | H→L (81.2%)<br>H→L+1 (17.8%)          | -9.22                                 |
|                                                                          | 3.0497   | 2.56 | 483.88    | S <sub>0</sub> →S <sub>9</sub>  | H→L+1 (72.9%)<br>H→L (20.4%)          | -35.04                                |
| A1A2A3                                                                   | 1.3624   | 1.81 | 686.50    | S <sub>0</sub> →S <sub>3</sub>  | H→L+1 (91.9%)                         | -13.46                                |
|                                                                          | 3.0711   | 3.38 | 367.00    | S <sub>0</sub> →S <sub>8</sub>  | H→L+1 (71.2%)                         | -16.09                                |

**Table S5** Calculated important parameters of  $(\gamma_{ijk})_m$  ( $\times 10^{-34}$  esu) of azulene-based molecules. The  $(\gamma_{ijk})_m$  is the second hyperpolarizability tensor of the *m*th excited state (S<sub>*m*</sub>) with a major contribution to the static first hyperpolarizability ( $\langle\beta_0\rangle$ ), *m* = 0 is the ground state, and *m* > 0 is the *m*th excited state.

| Structures<br>( $\langle\gamma_0\rangle_{3L}$ )                                          | $(\gamma_{zzzz})_{3Lm}$<br>(Contribution) | S <sub><i>m</i></sub>                            | E <sub><i>m</i></sub> | State dipole moment |      |       |      | Transition dipole moment |        |       |       |
|------------------------------------------------------------------------------------------|-------------------------------------------|--------------------------------------------------|-----------------------|---------------------|------|-------|------|--------------------------|--------|-------|-------|
|                                                                                          |                                           |                                                  |                       | X                   | Y    | Z     | tot  | X                        | Y      | Z     | tot   |
| A1[H <sub>N</sub> ]A2[H <sub>N</sub> P <sub>N</sub> ]<br>A3[P <sub>N</sub> ]<br>(-59.80) |                                           | S <sub>0</sub>                                   |                       | 0.00                | 0.00 | 5.54  | 5.54 |                          |        |       |       |
|                                                                                          |                                           | S <sub>1</sub> [S <sub>0</sub> →S <sub>1</sub> ] | 1.07                  | 0.00                | 0.00 | 6.36  | 6.36 | 0.00                     | 1.51   | 0.00  | 1.51  |
|                                                                                          | -45.19                                    | S <sub>2</sub> [S <sub>0</sub> →S <sub>2</sub> ] | 1.16                  | 0.00                | 0.00 | -2.28 | 2.28 | 0.00                     | 0.00   | -9.24 | 9.24  |
|                                                                                          |                                           | S <sub>3</sub> [S <sub>0</sub> →S <sub>3</sub> ] | 1.25                  | 0.00                | 0.00 | -1.38 | 1.38 | 0.00                     | -0.01  | 0.00  | 0.01  |
|                                                                                          |                                           | S <sub>4</sub> [S <sub>0</sub> →S <sub>4</sub> ] | 1.93                  | 0.00                | 0.00 | 0.30  | 0.30 | 0.00                     | -0.48  | 0.00  | 0.48  |
|                                                                                          |                                           | S <sub>5</sub> [S <sub>0</sub> →S <sub>5</sub> ] | 2.05                  | 0.00                | 0.00 | -8.84 | 8.84 | 0.00                     | 0.00   | -2.74 | 2.74  |
|                                                                                          |                                           | S <sub>6</sub> [S <sub>0</sub> →S <sub>6</sub> ] | 2.37                  | 0.00                | 0.00 | -1.01 | 1.01 | 0.00                     | 0.00   | -2.88 | 2.88  |
|                                                                                          |                                           | S <sub>7</sub> [S <sub>0</sub> →S <sub>7</sub> ] | 2.44                  | 0.00                | 0.00 | 1.45  | 1.45 | 0.00                     | -0.002 | 0.00  | 0.002 |
|                                                                                          |                                           | S <sub>8</sub> [S <sub>0</sub> →S <sub>8</sub> ] | 2.54                  | 0.00                | 0.00 | 3.36  | 3.36 | 0.00                     | -0.56  | 0.00  | 0.56  |
|                                                                                          | -174.01                                   | S <sub>9</sub> [S <sub>0</sub> →S <sub>9</sub> ] | 2.56                  | 0.00                | 0.00 | -2.03 | 2.03 | 0.00                     | 0.00   | 17.73 | 17.73 |
| A1A2A3 (-37.30)                                                                          |                                           | S <sub>0</sub>                                   |                       | 0.00                | 0.00 | -7.99 | 7.99 |                          |        |       |       |
|                                                                                          |                                           | S <sub>1</sub> [S <sub>0</sub> →S <sub>1</sub> ] | 0.88                  | 0.00                | 0.00 | 2.64  | 2.64 | 0.00                     | -1.62  | 0.00  | 1.62  |
|                                                                                          |                                           | S <sub>2</sub> [S <sub>0</sub> →S <sub>2</sub> ] | 1.70                  | 0.00                | 0.00 | -1.43 | 1.43 | 0.00                     | -0.27  | 0.00  | 0.27  |
|                                                                                          | -65.46                                    | S <sub>3</sub> [S <sub>0</sub> →S <sub>3</sub> ] | 1.81                  | 0.00                | 0.00 | 0.46  | 0.46 | 0.00                     | 0.00   | 14.11 | 14.11 |
|                                                                                          |                                           | S <sub>4</sub> [S <sub>0</sub> →S <sub>4</sub> ] | 2.44                  | 0.00                | 0.00 | -3.71 | 3.71 | 0.00                     | 0.57   | 0.00  | 0.57  |
|                                                                                          |                                           | S <sub>5</sub> [S <sub>0</sub> →S <sub>5</sub> ] | 2.69                  | 0.00                | 0.00 | 7.93  | 7.93 | 0.00                     | -0.49  | 0.00  | 0.49  |
|                                                                                          |                                           | S <sub>6</sub> [S <sub>0</sub> →S <sub>6</sub> ] | 2.85                  | 0.00                | 0.00 | -1.78 | 1.78 | 0.00                     | 0.00   | 1.17  | 1.17  |
|                                                                                          |                                           | S <sub>7</sub> [S <sub>0</sub> →S <sub>7</sub> ] | 2.93                  | 0.00                | 0.00 | -2.39 | 2.39 | 0.00                     | 0.00   | 0.08  | 0.08  |
|                                                                                          | -79.45                                    | S <sub>8</sub> [S <sub>0</sub> →S <sub>8</sub> ] | 3.38                  | 0.00                | 0.00 | 1.59  | 1.59 | 0.00                     | 0.00   | 15.49 | 15.49 |

1. A1[H<sub>N</sub>]A2[H<sub>N</sub>P<sub>N</sub>]A3[P<sub>N</sub>]:

(1) S<sub>0</sub>→S<sub>2</sub>:

S<sub>0</sub>→S<sub>1</sub>→S<sub>0</sub>→S<sub>2</sub>→S<sub>0</sub>; S<sub>0</sub>→S<sub>2</sub>→S<sub>0</sub>→S<sub>1</sub>→S<sub>0</sub>; S<sub>0</sub>→S<sub>2</sub>→S<sub>0</sub>→S<sub>2</sub>→S<sub>0</sub>

$$\begin{aligned} \gamma_{3L}(zzzz)(\text{Contribution})[S_0 \rightarrow S_2] &\approx -\frac{24 r_{01}^z r_{10}^z r_{02}^z r_{20}^z}{6 E_1 E_2^2} - \frac{24 r_{02}^z r_{20}^z r_{01}^z r_{10}^z}{6 E_2 E_1^2} - \frac{24 r_{02}^z r_{20}^z r_{02}^z r_{20}^z}{6 E_2^3} \\ &= \left[ -4 \times \frac{0 \times 0 \times (-9.24) \times (9.24)}{1.07 \times 1.16^2} - 4 \times \frac{(-9.24) \times (9.24) \times 0 \times 0}{1.16 \times 1.07^2} - 4 \times \frac{(-9.24) \times (9.24) \times (-9.24) \times (9.24)}{1.16^3} \right] \\ &\quad \times \frac{(10^{-18})^4}{(1.602 \times 10^{-12})^3} = -45.43 \times 10^{-34} \end{aligned}$$

(2) S<sub>0</sub>→S<sub>9</sub>:

S<sub>0</sub>→S<sub>1</sub>→S<sub>0</sub>→S<sub>9</sub>→S<sub>0</sub>; S<sub>0</sub>→S<sub>9</sub>→S<sub>0</sub>→S<sub>1</sub>→S<sub>0</sub>; S<sub>0</sub>→S<sub>2</sub>→S<sub>0</sub>→S<sub>9</sub>→S<sub>0</sub>; S<sub>0</sub>→S<sub>9</sub>→S<sub>0</sub>→S<sub>2</sub>→S<sub>0</sub>;

S<sub>0</sub>→S<sub>3</sub>→S<sub>0</sub>→S<sub>9</sub>→S<sub>0</sub>; S<sub>0</sub>→S<sub>9</sub>→S<sub>0</sub>→S<sub>3</sub>→S<sub>0</sub>; S<sub>0</sub>→S<sub>4</sub>→S<sub>0</sub>→S<sub>9</sub>→S<sub>0</sub>; S<sub>0</sub>→S<sub>9</sub>→S<sub>0</sub>→S<sub>4</sub>→S<sub>0</sub>;

S<sub>0</sub>→S<sub>5</sub>→S<sub>0</sub>→S<sub>9</sub>→S<sub>0</sub>; S<sub>0</sub>→S<sub>9</sub>→S<sub>0</sub>→S<sub>5</sub>→S<sub>0</sub>; S<sub>0</sub>→S<sub>6</sub>→S<sub>0</sub>→S<sub>9</sub>→S<sub>0</sub>; S<sub>0</sub>→S<sub>9</sub>→S<sub>0</sub>→S<sub>6</sub>→S<sub>0</sub>;

S<sub>0</sub>→S<sub>7</sub>→S<sub>0</sub>→S<sub>9</sub>→S<sub>0</sub>; S<sub>0</sub>→S<sub>9</sub>→S<sub>0</sub>→S<sub>7</sub>→S<sub>0</sub>; S<sub>0</sub>→S<sub>8</sub>→S<sub>0</sub>→S<sub>9</sub>→S<sub>0</sub>; S<sub>0</sub>→S<sub>9</sub>→S<sub>0</sub>→S<sub>8</sub>→S<sub>0</sub>;

S<sub>0</sub>→S<sub>9</sub>→S<sub>0</sub>→S<sub>9</sub>→S<sub>0</sub>

$$\begin{aligned} \gamma_{3L}(zzzz)(\text{Contribution})[S_0 \rightarrow S_9] &\approx -\frac{24 r_{01}^z r_{10}^z r_{09}^z r_{90}^z}{6 E_1 E_9^2} - \frac{24 r_{09}^z r_{90}^z r_{01}^z r_{10}^z}{6 E_9 E_1^2} - \frac{24 r_{02}^z r_{20}^z r_{09}^z r_{90}^z}{6 E_2 E_9^2} - \frac{24 r_{09}^z r_{90}^z r_{02}^z r_{20}^z}{6 E_9 E_2^2} - \frac{24 r_{03}^z r_{30}^z r_{09}^z r_{90}^z}{6 E_3 E_9^2} - \\ &\frac{24 r_{09}^z r_{90}^z r_{03}^z r_{30}^z}{6 E_9 E_3^2} - \frac{24 r_{04}^z r_{40}^z r_{09}^z r_{90}^z}{6 E_4 E_9^2} - \frac{24 r_{09}^z r_{90}^z r_{04}^z r_{40}^z}{6 E_9 E_4^2} - \frac{24 r_{05}^z r_{50}^z r_{09}^z r_{90}^z}{6 E_5 E_9^2} - \frac{24 r_{09}^z r_{90}^z r_{05}^z r_{50}^z}{6 E_9 E_5^2} - \frac{24 r_{06}^z r_{60}^z r_{09}^z r_{90}^z}{6 E_6 E_9^2} - \frac{24 r_{09}^z r_{90}^z r_{06}^z r_{60}^z}{6 E_9 E_6^2} - \\ &\frac{24 r_{07}^z r_{70}^z r_{09}^z r_{90}^z}{6 E_7 E_9^2} - \frac{24 r_{09}^z r_{90}^z r_{07}^z r_{70}^z}{6 E_9 E_7^2} - \frac{24 r_{08}^z r_{80}^z r_{09}^z r_{90}^z}{6 E_8 E_9^2} - \frac{24 r_{09}^z r_{90}^z r_{08}^z r_{80}^z}{6 E_9 E_8^2} - \frac{24 r_{09}^z r_{90}^z r_{09}^z r_{90}^z}{6 E_9^3} \\ &= \left[ -4 \times \frac{0 \times 0 \times (17.73) \times (-17.73)}{1.07 \times 2.56^2} - 4 \times \frac{(17.73) \times (-17.73) \times 0 \times 0}{2.56 \times 1.07^2} - 4 \times \frac{(-9.24) \times (9.24) \times (17.73) \times (-17.73)}{1.16 \times 2.56^2} - 4 \times \right. \\ &\frac{(17.73) \times (-17.73) \times (-9.24) \times (9.24)}{(17.73) \times (-17.73) \times 0 \times 0} - 4 \times \frac{0 \times 0 \times (17.73) \times (-17.73)}{(17.73) \times (-17.73) \times 0 \times 0} - 4 \times \frac{(17.73) \times (-17.73) \times 0 \times 0}{(17.73) \times (-17.73) \times (-2.74) \times (2.74)} - 4 \times \frac{0 \times 0 \times (17.73) \times (-17.73)}{1.93 \times 2.56^2} - 4 \times \\ &\frac{2.56 \times 1.16^2}{(17.73) \times (-17.73) \times 0 \times 0} - 4 \times \frac{(-2.74) \times (2.74) \times (17.73) \times (-17.73)}{1.25 \times 2.56^2} - 4 \times \frac{(17.73) \times (-17.73) \times (-2.74) \times (2.74)}{2.04 \times 2.56^2} - 4 \times \frac{2.56 \times 2.04^2}{2.56 \times 2.04^2} - 4 \times \\ &\frac{(-2.88) \times (2.88) \times (17.73) \times (-17.73)}{2.37 \times 2.56^2} - 4 \times \frac{(17.73) \times (-17.73) \times (-2.88) \times (2.88)}{2.56 \times 2.37^2} - 4 \times \frac{0 \times 0 \times (17.73) \times (-17.73)}{2.44 \times 2.56^2} - 4 \times \frac{(17.73) \times (-17.73) \times 0 \times 0}{2.56 \times 2.44^2} - \\ &\left. 4 \times \frac{0 \times 0 \times (17.73) \times (-17.73)}{2.53 \times 2.56^2} - 4 \times \frac{(17.73) \times (-17.73) \times 0 \times 0}{2.53 \times 1.07^2} - 4 \times \frac{(17.73) \times (-17.73) \times (17.73) \times (-17.73)}{2.56^3} \right] \times \frac{(10^{-18})^4}{(1.602 \times 10^{-12})^3} \\ &= [-14121.59 - 31164.88 - 706.10 - 886.09 - 671.48 - 725.31 - 23559.99] \times \frac{(10^{-18})^4}{(1.602 \times 10^{-12})^3} \\ &= -174.72 \times 10^{-34} \end{aligned}$$

2. A1A2A3:

(1) S<sub>0</sub>→S<sub>3</sub>:

S<sub>0</sub>→S<sub>1</sub>→S<sub>0</sub>→S<sub>3</sub>→S<sub>0</sub>; S<sub>0</sub>→S<sub>3</sub>→S<sub>0</sub>→S<sub>1</sub>→S<sub>0</sub>; S<sub>0</sub>→S<sub>2</sub>→S<sub>0</sub>→S<sub>3</sub>→S<sub>0</sub>; S<sub>0</sub>→S<sub>3</sub>→S<sub>0</sub>→S<sub>2</sub>→S<sub>0</sub>;

S<sub>0</sub>→S<sub>3</sub>→S<sub>0</sub>→S<sub>3</sub>→S<sub>0</sub>

$$\begin{aligned} \gamma_{3L}(zzzz)(\text{Contribution})[S_0 \rightarrow S_3] &\approx -\frac{24 r_{01}^z r_{10}^z r_{03}^z r_{30}^z}{6 E_1 E_3^2} - \frac{24 r_{03}^z r_{30}^z r_{01}^z r_{10}^z}{6 E_3 E_1^2} - \frac{24 r_{02}^z r_{20}^z r_{03}^z r_{30}^z}{6 E_2 E_3^2} \\ &- \frac{24 r_{03}^z r_{30}^z r_{02}^z r_{20}^z}{6 E_3 E_2^2} - \frac{24 r_{03}^z r_{30}^z r_{03}^z r_{30}^z}{6 E_3^3} \\ &= \left[ -4 \times \frac{0 \times 0 \times (14.11) \times (-14.11)}{0.88 \times 1.81^2} - 4 \times \frac{(14.11) \times (-14.11) \times 0 \times 0}{1.81 \times 0.88^2} - 4 \times \frac{0 \times 0 \times (14.11) \times (-14.11)}{1.70 \times 1.81^2} - 4 \times \right. \\ &\frac{(14.11) \times (-14.11) \times 0 \times 0}{1.81 \times 1.70^2} - 4 \times \frac{(14.11) \times (-14.11) \times (14.11) \times (-14.11)}{1.81^3} \left. \right] \\ &\quad \times \frac{(10^{-18})^4}{(1.602 \times 10^{-12})^3} = -65.03 \times 10^{-34} \end{aligned}$$



(2)  $S_0 \rightarrow S_8$ :

$S_0 \rightarrow S_1 \rightarrow S_0 \rightarrow S_8 \rightarrow S_0$ ;  $S_0 \rightarrow S_8 \rightarrow S_0 \rightarrow S_1 \rightarrow S_0$ ;  $S_0 \rightarrow S_2 \rightarrow S_0 \rightarrow S_8 \rightarrow S_0$ ;  $S_0 \rightarrow S_8 \rightarrow S_0 \rightarrow S_2 \rightarrow S_0$  ;  
 $S_0 \rightarrow S_3 \rightarrow S_0 \rightarrow S_8 \rightarrow S_0$ ;  $S_0 \rightarrow S_8 \rightarrow S_0 \rightarrow S_3 \rightarrow S_0$ ;  $S_0 \rightarrow S_4 \rightarrow S_0 \rightarrow S_8 \rightarrow S_0$ ;  $S_0 \rightarrow S_8 \rightarrow S_0 \rightarrow S_4 \rightarrow S_0$ ;  
 $S_0 \rightarrow S_5 \rightarrow S_0 \rightarrow S_8 \rightarrow S_0$ ;  $S_0 \rightarrow S_8 \rightarrow S_0 \rightarrow S_5 \rightarrow S_0$ ;  $S_0 \rightarrow S_6 \rightarrow S_0 \rightarrow S_8 \rightarrow S_0$ ;  $S_0 \rightarrow S_8 \rightarrow S_0 \rightarrow S_6 \rightarrow S_0$ ;  
 $S_0 \rightarrow S_7 \rightarrow S_0 \rightarrow S_8 \rightarrow S_0$ ;  $S_0 \rightarrow S_8 \rightarrow S_0 \rightarrow S_7 \rightarrow S_0$ ;  $S_0 \rightarrow S_8 \rightarrow S_0 \rightarrow S_8 \rightarrow S_0$

$$\begin{aligned}
\mathcal{V}_{3L}(zzzz)(\text{Contribution})[S_0 \rightarrow S_8] &\approx -\frac{24 r_{01}^z r_{10}^z r_{08}^z r_{80}^z}{6 E_1 E_8^2} - \frac{24 r_{08}^z r_{80}^z r_{01}^z r_{10}^z}{6 E_8 E_1^2} - \frac{24 r_{02}^z r_{20}^z r_{08}^z r_{80}^z}{6 E_2 E_8^2} \\
&- \frac{24 r_{08}^z r_{80}^z r_{08}^z r_{80}^z}{6 E_8 E_2^2} - \frac{24 r_{03}^z r_{30}^z r_{08}^z r_{80}^z}{6 E_3 E_8^2} - \frac{24 r_{08}^z r_{80}^z r_{03}^z r_{30}^z}{6 E_8 E_3^2} - \frac{24 r_{04}^z r_{40}^z r_{08}^z r_{80}^z}{6 E_4 E_{98}^2} \\
&- \frac{24 r_{08}^z r_{80}^z r_{04}^z r_{40}^z}{6 E_8 E_4^2} - \frac{24 r_{05}^z r_{50}^z r_{08}^z r_{80}^z}{6 E_5 E_8^2} - \frac{24 r_{08}^z r_{80}^z r_{05}^z r_{50}^z}{6 E_8 E_5^2} - \frac{24 r_{06}^z r_{60}^z r_{08}^z r_{80}^z}{6 E_6 E_8^2} - \frac{24 r_{08}^z r_{80}^z r_{06}^z r_{60}^z}{6 E_8 E_6^2} - \frac{24 r_{07}^z r_{70}^z r_{08}^z r_{80}^z}{6 E_7 E_8^2} \\
&- \frac{24 r_{08}^z r_{80}^z r_{07}^z r_{70}^z}{6 E_8 E_7^2} - \frac{24 r_{08}^z r_{80}^z r_{08}^z r_{80}^z}{6 E_8^3} \\
&= \left[ -4 \times \frac{0 \times 0 \times (15.49) \times (-15.49)}{0.88 \times 3.38^2} - 4 \times \frac{(15.49) \times (-15.49) \times 0 \times 0}{3.38 \times 0.88^2} - 4 \times \frac{0 \times 0 \times (15.49) \times (-15.49)}{1.70 \times 3.38^2} - 4 \times \frac{(15.49) \times (-15.49) \times 0 \times 0}{3.38 \times 1.70^2} - 4 \times \right. \\
&\frac{(14.11) \times (-14.11) \times (15.49) \times (-15.49)}{1.81 \times 3.38^2} - 4 \times \frac{(15.49) \times (-15.49) \times (14.11) \times (-14.11)}{3.38 \times 1.81^2} - 4 \times \frac{0 \times 0 \times (15.49) \times (-15.49)}{(1.17) \times (-1.17) \times (15.49) \times (-15.49)} - 4 \times \\
&\frac{(15.49) \times (-15.49) \times 0 \times 0}{3.38 \times 2.44^2} - 4 \times \frac{0 \times 0 \times (15.49) \times (-15.49)}{2.69 \times 3.38^2} - 4 \times \frac{(15.49) \times (-15.49) \times 0 \times 0}{3.38 \times 2.69^2} - 4 \times \frac{2.44 \times 3.38^2}{(1.17) \times (-1.17) \times (15.49) \times (-15.49)} - 4 \times \\
&\frac{(15.49) \times (-15.49) \times (1.17) \times (-1.17)}{3.38 \times 2.85^2} - 4 \times \frac{2.69 \times 3.38^2}{(0.08) \times (-0.08) \times (15.49) \times (-15.49)} - 4 \times \frac{3.38 \times 2.69^2}{(15.49) \times (-15.49) \times (0.08) \times (-0.08)} - 4 \times \\
&\left. \frac{(15.49) \times (-15.49) \times (15.49) \times (-15.49)}{3.38^3} \right] \times \frac{(10^{-18})^4}{(1.602 \times 10^{-12})^3} \\
&= [-9240.70 - 17256.11 - 40.35 - 47.86 - 0.18 - 0.21 - 5963.70] \times \frac{(10^{-18})^4}{(1.602 \times 10^{-12})^3} \\
&= -79.17 \times 10^{-34}
\end{aligned}$$

**Table S6** The strong response and corresponding major electron excitations contribution of the dynamic third-order nonlinear optic response for A1A2A3.

| processes                                  | External Field/eV ( $\lambda$ /nm) | Responses | Major Electron Excitations Contribution                       |
|--------------------------------------------|------------------------------------|-----------|---------------------------------------------------------------|
| TPA                                        | 1.80 (688.89)                      | 8246230   | 1.81 eV (685.08 nm) (8970470.13)                              |
| $\delta(-\omega; \omega, -\omega, \omega)$ | 3.35 (370.15)                      | -2422840  | 3.38 eV (366.86 nm) (-1934184.57)                             |
|                                            | 3.40 (364.71)                      | -299153   | 3.49 eV (355.30 nm) (196126)                                  |
| DFWM                                       | 1.80 (688.89)                      | 1620790   | 1.81 eV (685.08 nm) (1503379.96)                              |
| $\gamma(-\omega; \omega, -\omega, \omega)$ | 3.35 (370.15)                      | 248589    | 3.38 eV (366.86 nm) (242769.94)                               |
|                                            | 3.40 (364.71)                      | -323553   | 3.38 eV (366.86 nm) (-330511.54)                              |
| THG                                        | 1.75 (708.57)                      | -20806    | 2.93 eV (423.21 nm) (-14600.93)                               |
| $\gamma(-3\omega; \omega, \omega, \omega)$ | 1.80 (688.89)                      | 137721    | 2.93 eV (423.21 nm) (103364.40)                               |
|                                            | 1.85 (670.27)                      | -16890    | 2.93 eV (423.21 nm) (-13468.28)                               |
|                                            | 3.40 (364.71)                      | 12744     | 4.68 eV (264.96 nm) (5491.28)                                 |
| EFISH                                      | 0.90 (1377.78)                     | 13334     | 1.81 eV (685.08 nm) (8636.552); 2.69 eV (460.97 nm) (2854.15) |
| $\gamma(-2\omega; \omega, \omega, 0)$      | 1.80 (688.89)                      | 164880    | 1.81 eV (685.08 nm) (186926.01)                               |
|                                            | 3.35 (370.15)                      | 30184     | 3.38 eV (366.86 nm) (31996.19)                                |
|                                            | 3.40 (364.71)                      | -44008    | 3.38 eV (366.86 nm) (-39667.90)                               |

**Table S7** The strong response and corresponding major electron excitations contribution of the dynamic third-order nonlinear optic response of A1[H<sub>N</sub>]A2[H<sub>N</sub>P<sub>N</sub>]A3[P<sub>N</sub>].

| processes                                          | External Field/eV ( $\lambda$ /nm) | Responses | Major Electron Excitations Contribution                           |
|----------------------------------------------------|------------------------------------|-----------|-------------------------------------------------------------------|
| TPA<br>$\delta(-\omega; \omega, -\omega, \omega)$  | 1.15 (1078.26)                     | -1540630  | 1.16 eV (1068.96 nm) (-1988440); 2.37 eV (523.21 nm) (659830)     |
|                                                    | 2.50 (496)                         | -1952420  | 2.56 eV (484.38 nm) (-1896602.722)                                |
|                                                    | 2.55 (486.27)                      | 4266100   | 2.56 eV (484.38 nm) (5148370.36)                                  |
|                                                    | 2.60 (476.92)                      | -7657630  | 2.60 eV (476.92 nm) (-7859635.83)                                 |
| DFWM<br>$\gamma(-\omega; \omega, -\omega, \omega)$ | 1.15 (1078.26)                     | 548686    | 1.16 eV (1068.96 nm) (627263.91); 2.37 eV (523.21 nm) (-60384)    |
|                                                    | 2.55 (486.27)                      | 2467150   | 2.56 eV (484.38 nm) (2451555.32)                                  |
| THG<br>$\gamma(-3\omega; \omega, \omega, \omega)$  | 1.05 (1180.95)                     | -10249    | 2.05 eV (604.88 nm) (-8535.56); 4.14 eV(299.52 nm) (-1374.66)     |
|                                                    | 2.55 (486.27)                      | 39561     | 2.56 eV (484.38 nm) (15228.58); 3.69 eV (336.04 nm) (29654.30)    |
| EFISH<br>$\gamma(-2\omega; \omega, \omega, 0)$     | 1.15 (1078.26)                     | 55719     | 1.16 eV (1068.96 nm) (149783.01); 3.45 eV (359.42 nm) (-92064.70) |
|                                                    | 2.05 (604.88)                      | -21656    | 2.05 eV (604.88 nm) (-18189.62); 2.56 eV (484.38 nm) (-3165.80)   |
|                                                    | 2.55 (486.27)                      | 149427    | 2.56 eV (484.38 nm) (-164192.85)                                  |

Cartesian coordinates of all molecules optimized with b3lyp/6-31G(d,p)

| A1A2A3 |   |           |            | A3[H <sub>B</sub> P <sub>B</sub> ] |   |           |              |
|--------|---|-----------|------------|------------------------------------|---|-----------|--------------|
| C      | 0 | 0         | -9.187777  | C                                  | 0 | 0         | -9.13239766  |
| C      | 0 | 1.265996  | -8.595756  | C                                  | 0 | 1.265996  | -8.54037666  |
| C      | 0 | 1.589678  | -7.23148   | C                                  | 0 | 1.589678  | -7.17610066  |
| C      | 0 | -1.265996 | -8.595756  | C                                  | 0 | -1.265996 | -8.54037666  |
| C      | 0 | 0.749116  | -6.127958  | C                                  | 0 | 0.749116  | -6.07257866  |
| C      | 0 | -1.589678 | -7.23148   | C                                  | 0 | -1.589678 | -7.17610066  |
| C      | 0 | -0.749116 | -6.127958  | C                                  | 0 | -0.749116 | -6.07257866  |
| H      | 0 | 0         | -10.276295 | H                                  | 0 | 0         | -10.22091566 |
| H      | 0 | 2.109709  | -9.280405  | H                                  | 0 | 2.109709  | -9.22502566  |
| H      | 0 | 2.655422  | -7.00769   | H                                  | 0 | 2.655422  | -6.95231066  |
| H      | 0 | -2.109709 | -9.280405  | H                                  | 0 | -2.109709 | -9.22502566  |
| H      | 0 | -2.655422 | -7.00769   | H                                  | 0 | -2.655422 | -6.95231066  |
| C      | 0 | 1.165553  | -4.766228  | C                                  | 0 | 1.165553  | -4.71084866  |
| C      | 0 | 0         | -3.950521  | C                                  | 0 | 0         | -3.89514166  |
| C      | 0 | -1.165553 | -4.766228  | C                                  | 0 | -1.165553 | -4.71084866  |
| C      | 0 | 0         | -2.532055  | C                                  | 0 | 0         | -2.47667566  |
| C      | 0 | -1.305082 | -1.910542  | C                                  | 0 | -1.305082 | -1.85516266  |
| C      | 0 | 1.305082  | -1.910542  | C                                  | 0 | 1.305082  | -1.85516266  |
| C      | 0 | -1.580366 | -0.518412  | C                                  | 0 | -1.580366 | -0.46303266  |
| C      | 0 | 1.580366  | -0.518412  | C                                  | 0 | 1.580366  | -0.46303266  |
| C      | 0 | -0.74355  | 0.575092   | C                                  | 0 | -0.74355  | 0.63047134   |
| H      | 0 | -2.642683 | -0.279472  | H                                  | 0 | -2.642683 | -0.22409266  |
| C      | 0 | 0.74355   | 0.575092   | C                                  | 0 | 0.74355   | 0.63047134   |
| H      | 0 | 2.642683  | -0.279472  | H                                  | 0 | 2.642683  | -0.22409266  |
| C      | 0 | -1.163845 | 1.943244   | C                                  | 0 | -1.163845 | 1.99862334   |
| C      | 0 | 1.163845  | 1.943244   | C                                  | 0 | 1.163845  | 1.99862334   |
| C      | 0 | 0         | 2.759477   | C                                  | 0 | 0         | 2.81485634   |
| C      | 0 | -2.429854 | -4.132841  | C                                  | 0 | -2.429854 | -4.07746166  |
| H      | 0 | -3.353322 | -4.704177  | H                                  | 0 | -3.353322 | -4.64879766  |
| C      | 0 | -2.468447 | -2.761666  | C                                  | 0 | -2.468447 | -2.70628666  |
| H      | 0 | -3.434671 | -2.265396  | H                                  | 0 | -3.434671 | -2.21001666  |
| C      | 0 | 2.468447  | -2.761666  | C                                  | 0 | 2.468447  | -2.70628666  |
| H      | 0 | 3.434671  | -2.265396  | H                                  | 0 | 3.434671  | -2.21001666  |
| C      | 0 | 2.429854  | -4.132841  | C                                  | 0 | 2.429854  | -4.07746166  |
| H      | 0 | 3.353322  | -4.704177  | H                                  | 0 | 3.353322  | -4.64879766  |
| C      | 0 | 0         | 4.178768   | C                                  | 0 | -1.306075 | 4.85589634   |
| C      | 0 | -1.306075 | 4.800517   | C                                  | 0 | -1.585021 | 6.24264234   |
| C      | 0 | -1.585021 | 6.187263   | C                                  | 0 | 1.306075  | 4.85589634   |
| C      | 0 | 1.306075  | 4.800517   | C                                  | 0 | -0.744681 | 7.34081434   |
| C      | 0 | -0.744681 | 7.285435   | C                                  | 0 | 1.585021  | 6.24264234   |
| C      | 0 | 1.585021  | 6.187263   | C                                  | 0 | 0.744681  | 7.34081434   |
| C      | 0 | 0.744681  | 7.285435   | H                                  | 0 | -2.646903 | 6.48642934   |
| H      | 0 | -2.646903 | 6.43105    | H                                  | 0 | 2.646903  | 6.48642934   |
| H      | 0 | 2.646903  | 6.43105    | C                                  | 0 | -1.148431 | 8.69387434   |
| C      | 0 | -1.148431 | 8.638495   | C                                  | 0 | 1.148431  | 8.69387434   |
| C      | 0 | 0         | 9.444565   | C                                  | 0 | 2.426537  | 2.62885334   |
| C      | 0 | 1.148431  | 8.638495   | C                                  | 0 | 2.46902   | 4.00023134   |
| C      | 0 | 2.426537  | 2.573474   | H                                  | 0 | 3.349235  | 2.05573934   |
| C      | 0 | 2.46902   | 3.944852   | H                                  | 0 | 3.436075  | 4.49478734   |
| H      | 0 | 3.349235  | 2.00036    | C                                  | 0 | -2.426537 | 2.62885334   |
| H      | 0 | 3.436075  | 4.439408   | C                                  | 0 | -2.46902  | 4.00023134   |
| C      | 0 | -2.426537 | 2.573474   | H                                  | 0 | -3.349235 | 2.05573934   |
| C      | 0 | -2.46902  | 3.944852   | H                                  | 0 | -3.436075 | 4.49478734   |
| H      | 0 | -3.349235 | 2.00036    | H                                  | 0 | 2.176091  | 9.03709134   |
| H      | 0 | -3.436075 | 4.439408   | H                                  | 0 | 0         | 10.58429934  |
| H      | 0 | 2.176091  | 8.981712   | H                                  | 0 | -2.176091 | 9.03709134   |
| H      | 0 | 0         | 10.52892   | B                                  | 0 | 0         | 9.49994434   |
| H      | 0 | -2.176091 | 8.981712   | B                                  | 0 | 0         | 4.23414734   |

A3[H<sub>N</sub>P<sub>N</sub>]

A3[H<sub>B</sub>P<sub>N</sub>]

|   |   |           |              |   |   |           |              |
|---|---|-----------|--------------|---|---|-----------|--------------|
| C | 0 | 0         | -9.24227039  | C | 0 | 0         | -9.20901011  |
| C | 0 | 1.265996  | -8.65024939  | C | 0 | 1.265996  | -8.61698911  |
| C | 0 | 1.589678  | -7.28597339  | C | 0 | 1.589678  | -7.25271311  |
| C | 0 | -1.265996 | -8.65024939  | C | 0 | -1.265996 | -8.61698911  |
| C | 0 | 0.749116  | -6.18245139  | C | 0 | 0.749116  | -6.14919111  |
| C | 0 | -1.589678 | -7.28597339  | C | 0 | -1.589678 | -7.25271311  |
| C | 0 | -0.749116 | -6.18245139  | C | 0 | -0.749116 | -6.14919111  |
| H | 0 | 0         | -10.33078839 | H | 0 | 0         | -10.29752811 |
| H | 0 | 2.109709  | -9.33489839  | H | 0 | 2.109709  | -9.30163811  |
| H | 0 | 2.655422  | -7.06218339  | H | 0 | 2.655422  | -7.02892311  |
| H | 0 | -2.109709 | -9.33489839  | H | 0 | -2.109709 | -9.30163811  |
| H | 0 | -2.655422 | -7.06218339  | H | 0 | -2.655422 | -7.02892311  |
| C | 0 | 1.165553  | -4.82072139  | C | 0 | 1.165553  | -4.78746111  |
| C | 0 | 0         | -4.00501439  | C | 0 | 0         | -3.97175411  |
| C | 0 | -1.165553 | -4.82072139  | C | 0 | -1.165553 | -4.78746111  |
| C | 0 | 0         | -2.58654839  | C | 0 | 0         | -2.55328811  |
| C | 0 | -1.305082 | -1.96503539  | C | 0 | -1.305082 | -1.93177511  |
| C | 0 | 1.305082  | -1.96503539  | C | 0 | 1.305082  | -1.93177511  |
| C | 0 | -1.580366 | -0.57290539  | C | 0 | -1.580366 | -0.53964511  |
| C | 0 | 1.580366  | -0.57290539  | C | 0 | 1.580366  | -0.53964511  |
| C | 0 | -0.74355  | 0.52059861   | C | 0 | -0.74355  | 0.55385889   |
| H | 0 | -2.642683 | -0.33396539  | H | 0 | -2.642683 | -0.30070511  |
| C | 0 | 0.74355   | 0.52059861   | C | 0 | 0.74355   | 0.55385889   |
| H | 0 | 2.642683  | -0.33396539  | H | 0 | 2.642683  | -0.30070511  |
| C | 0 | -1.163845 | 1.88875061   | C | 0 | -1.163845 | 1.92201089   |
| C | 0 | 1.163845  | 1.88875061   | C | 0 | 1.163845  | 1.92201089   |
| C | 0 | 0         | 2.70498361   | C | 0 | 0         | 2.73824389   |
| C | 0 | -2.429854 | -4.18733439  | C | 0 | -2.429854 | -4.15407411  |
| H | 0 | -3.353322 | -4.75867039  | H | 0 | -3.353322 | -4.72541011  |
| C | 0 | -2.468447 | -2.81615939  | C | 0 | -2.468447 | -2.78289911  |
| H | 0 | -3.434671 | -2.31988939  | H | 0 | -3.434671 | -2.28662911  |
| C | 0 | 2.468447  | -2.81615939  | C | 0 | 2.468447  | -2.78289911  |
| H | 0 | 3.434671  | -2.31988939  | H | 0 | 3.434671  | -2.28662911  |
| C | 0 | 2.429854  | -4.18733439  | C | 0 | 2.429854  | -4.15407411  |
| H | 0 | 3.353322  | -4.75867039  | H | 0 | 3.353322  | -4.72541011  |
| C | 0 | -1.306075 | 4.74602361   | C | 0 | -1.306075 | 4.77928389   |
| C | 0 | -1.585021 | 6.13276961   | C | 0 | -1.585021 | 6.16602989   |
| C | 0 | 1.306075  | 4.74602361   | C | 0 | 1.306075  | 4.77928389   |
| C | 0 | -0.744681 | 7.23094161   | C | 0 | -0.744681 | 7.26420189   |
| C | 0 | 1.585021  | 6.13276961   | C | 0 | 1.585021  | 6.16602989   |
| C | 0 | 0.744681  | 7.23094161   | C | 0 | 0.744681  | 7.26420189   |
| H | 0 | -2.646903 | 6.37655661   | H | 0 | -2.646903 | 6.40981689   |
| H | 0 | 2.646903  | 6.37655661   | H | 0 | 2.646903  | 6.40981689   |
| C | 0 | -1.148431 | 8.58400161   | C | 0 | -1.148431 | 8.61726189   |
| C | 0 | 1.148431  | 8.58400161   | C | 0 | 1.148431  | 8.61726189   |
| C | 0 | 2.426537  | 2.51898061   | C | 0 | 2.426537  | 2.55224089   |
| C | 0 | 2.46902   | 3.89035861   | C | 0 | 2.46902   | 3.92361889   |
| H | 0 | 3.349235  | 1.94586661   | H | 0 | 3.349235  | 1.97912689   |
| H | 0 | 3.436075  | 4.38491461   | H | 0 | 3.436075  | 4.41817489   |
| C | 0 | -2.426537 | 2.51898061   | C | 0 | -2.426537 | 2.55224089   |
| C | 0 | -2.46902  | 3.89035861   | C | 0 | -2.46902  | 3.92361889   |
| H | 0 | -3.349235 | 1.94586661   | H | 0 | -3.349235 | 1.97912689   |
| H | 0 | -3.436075 | 4.38491461   | H | 0 | -3.436075 | 4.41817489   |
| H | 0 | 2.176091  | 8.92721861   | H | 0 | 2.176091  | 8.96047889   |
| H | 0 | 0         | 10.47442661  | H | 0 | 0         | 10.50768689  |
| H | 0 | -2.176091 | 8.92721861   | H | 0 | -2.176091 | 8.96047889   |
| N | 0 | 0         | 9.39007161   | N | 0 | 0         | 9.42333189   |
| N | 0 | 0         | 4.12427461   | B | 0 | 0         | 4.15753489   |

|   |   |                                       |             |   |   |                                           |             |
|---|---|---------------------------------------|-------------|---|---|-------------------------------------------|-------------|
|   |   | <b>A3[H<sub>N</sub>P<sub>B</sub>]</b> |             |   |   | <b>A1[H<sub>B</sub>]A3[P<sub>B</sub>]</b> |             |
| C | 0 | 0                                     | -9.16654401 | C | 0 | 1.265996                                  | -8.59471221 |
| C | 0 | 1.265996                              | -8.57452301 | C | 0 | 1.589678                                  | -7.23043621 |
| C | 0 | 1.589678                              | -7.21024701 | C | 0 | -1.265996                                 | -8.59471221 |
| C | 0 | -1.265996                             | -8.57452301 | C | 0 | 0.749116                                  | -6.12691421 |

|                                             |   |           |              |                                             |   |           |              |
|---------------------------------------------|---|-----------|--------------|---------------------------------------------|---|-----------|--------------|
| C                                           | 0 | 0.749116  | -6.10672501  | C                                           | 0 | -1.589678 | -7.23043621  |
| C                                           | 0 | -1.589678 | -7.21024701  | C                                           | 0 | -0.749116 | -6.12691421  |
| C                                           | 0 | -0.749116 | -6.10672501  | H                                           | 0 | 0         | -10.27525121 |
| H                                           | 0 | 0         | -10.25506201 | H                                           | 0 | 2.109709  | -9.27936121  |
| H                                           | 0 | 2.109709  | -9.25917201  | H                                           | 0 | 2.655422  | -7.00664621  |
| H                                           | 0 | 2.655422  | -6.98645701  | H                                           | 0 | -2.109709 | -9.27936121  |
| H                                           | 0 | -2.109709 | -9.25917201  | H                                           | 0 | -2.655422 | -7.00664621  |
| H                                           | 0 | -2.655422 | -6.98645701  | C                                           | 0 | 1.165553  | -4.76518421  |
| C                                           | 0 | 1.165553  | -4.74499501  | C                                           | 0 | 0         | -3.94947721  |
| C                                           | 0 | 0         | -3.92928801  | C                                           | 0 | -1.165553 | -4.76518421  |
| C                                           | 0 | -1.165553 | -4.74499501  | C                                           | 0 | 0         | -2.53101121  |
| C                                           | 0 | 0         | -2.51082201  | C                                           | 0 | -1.305082 | -1.90949821  |
| C                                           | 0 | -1.305082 | -1.88930901  | C                                           | 0 | 1.305082  | -1.90949821  |
| C                                           | 0 | 1.305082  | -1.88930901  | C                                           | 0 | -1.580366 | -0.51736821  |
| C                                           | 0 | -1.580366 | -0.49717901  | C                                           | 0 | 1.580366  | -0.51736821  |
| C                                           | 0 | 1.580366  | -0.49717901  | C                                           | 0 | -0.74355  | 0.57613579   |
| C                                           | 0 | -0.74355  | 0.59632499   | H                                           | 0 | -2.642683 | -0.27842821  |
| H                                           | 0 | -2.642683 | -0.25823901  | C                                           | 0 | 0.74355   | 0.57613579   |
| C                                           | 0 | 0.74355   | 0.59632499   | H                                           | 0 | 2.642683  | -0.27842821  |
| H                                           | 0 | 2.642683  | -0.25823901  | C                                           | 0 | -1.163845 | 1.94428779   |
| C                                           | 0 | -1.163845 | 1.96447699   | C                                           | 0 | 1.163845  | 1.94428779   |
| C                                           | 0 | 1.163845  | 1.96447699   | C                                           | 0 | 0         | 2.76052079   |
| C                                           | 0 | 0         | 2.78070999   | C                                           | 0 | -2.429854 | -4.13179721  |
| C                                           | 0 | -2.429854 | -4.11160801  | H                                           | 0 | -3.353322 | -4.70313321  |
| H                                           | 0 | -3.353322 | -4.68294401  | C                                           | 0 | -2.468447 | -2.76062221  |
| C                                           | 0 | -2.468447 | -2.74043301  | H                                           | 0 | -3.434671 | -2.26435221  |
| H                                           | 0 | -3.434671 | -2.24416301  | C                                           | 0 | 2.468447  | -2.76062221  |
| C                                           | 0 | 2.468447  | -2.74043301  | H                                           | 0 | 3.434671  | -2.26435221  |
| H                                           | 0 | 3.434671  | -2.24416301  | C                                           | 0 | 2.429854  | -4.13179721  |
| C                                           | 0 | 2.429854  | -4.11160801  | H                                           | 0 | 3.353322  | -4.70313321  |
| H                                           | 0 | 3.353322  | -4.68294401  | C                                           | 0 | 0         | 4.17981179   |
| C                                           | 0 | -1.306075 | 4.82174999   | C                                           | 0 | -1.306075 | 4.80156079   |
| C                                           | 0 | -1.585021 | 6.20849599   | C                                           | 0 | -1.585021 | 6.18830679   |
| C                                           | 0 | 1.306075  | 4.82174999   | C                                           | 0 | 1.306075  | 4.80156079   |
| C                                           | 0 | -0.744681 | 7.30666799   | C                                           | 0 | -0.744681 | 7.28647879   |
| C                                           | 0 | 1.585021  | 6.20849599   | C                                           | 0 | 1.585021  | 6.18830679   |
| C                                           | 0 | 0.744681  | 7.30666799   | C                                           | 0 | 0.744681  | 7.28647879   |
| H                                           | 0 | -2.646903 | 6.45228299   | H                                           | 0 | -2.646903 | 6.43209379   |
| H                                           | 0 | 2.646903  | 6.45228299   | H                                           | 0 | 2.646903  | 6.43209379   |
| C                                           | 0 | -1.148431 | 8.65972799   | C                                           | 0 | -1.148431 | 8.63953879   |
| C                                           | 0 | 1.148431  | 8.65972799   | C                                           | 0 | 1.148431  | 8.63953879   |
| C                                           | 0 | 2.426537  | 2.59470699   | C                                           | 0 | 2.426537  | 2.57451779   |
| C                                           | 0 | 2.46902   | 3.96608499   | C                                           | 0 | 2.46902   | 3.94589579   |
| H                                           | 0 | 3.349235  | 2.02159299   | H                                           | 0 | 3.349235  | 2.00140379   |
| H                                           | 0 | 3.436075  | 4.46064099   | H                                           | 0 | 3.436075  | 4.44045179   |
| C                                           | 0 | -2.426537 | 2.59470699   | C                                           | 0 | -2.426537 | 2.57451779   |
| C                                           | 0 | -2.46902  | 3.96608499   | C                                           | 0 | -2.46902  | 3.94589579   |
| H                                           | 0 | -3.349235 | 2.02159299   | H                                           | 0 | -3.349235 | 2.00140379   |
| H                                           | 0 | -3.436075 | 4.46064099   | H                                           | 0 | -3.436075 | 4.44045179   |
| H                                           | 0 | 2.176091  | 9.00294499   | H                                           | 0 | 2.176091  | 8.98275579   |
| H                                           | 0 | 0         | 10.55015299  | H                                           | 0 | 0         | 10.52996379  |
| H                                           | 0 | -2.176091 | 9.00294499   | H                                           | 0 | -2.176091 | 8.98275579   |
| B                                           | 0 | 0         | 9.46579799   | B                                           | 0 | 0         | 9.44560879   |
| N                                           | 0 | 0         | 4.20000099   | B                                           | 0 | 0         | -9.18673321  |
| <b>A1[H<sub>N</sub>][A3][P<sub>N</sub>]</b> |   |           |              | <b>A1[H<sub>B</sub>][A3][P<sub>N</sub>]</b> |   |           |              |
| C                                           | 0 | 1.265996  | -8.59678321  | C                                           | 0 | 1.265996  | -8.67088647  |
| C                                           | 0 | 1.589678  | -7.23250721  | C                                           | 0 | 1.589678  | -7.30661047  |
| C                                           | 0 | -1.265996 | -8.59678321  | C                                           | 0 | -1.265996 | -8.67088647  |
| C                                           | 0 | 0.749116  | -6.12898521  | C                                           | 0 | 0.749116  | -6.20308847  |
| C                                           | 0 | -1.589678 | -7.23250721  | C                                           | 0 | -1.589678 | -7.30661047  |
| C                                           | 0 | -0.749116 | -6.12898521  | C                                           | 0 | -0.749116 | -6.20308847  |
| H                                           | 0 | 0         | -10.27732221 | H                                           | 0 | 0         | -10.35142547 |
| H                                           | 0 | 2.109709  | -9.28143221  | H                                           | 0 | 2.109709  | -9.35553547  |

|   |   |           |             |   |   |           |             |
|---|---|-----------|-------------|---|---|-----------|-------------|
| H | 0 | 2.655422  | -7.00871721 | H | 0 | 2.655422  | -7.08282047 |
| H | 0 | -2.109709 | -9.28143221 | H | 0 | -2.109709 | -9.35553547 |
| H | 0 | -2.655422 | -7.00871721 | H | 0 | -2.655422 | -7.08282047 |
| C | 0 | 1.165553  | -4.76725521 | C | 0 | 1.165553  | -4.84135847 |
| C | 0 | 0         | -3.95154821 | C | 0 | 0         | -4.02565147 |
| C | 0 | -1.165553 | -4.76725521 | C | 0 | -1.165553 | -4.84135847 |
| C | 0 | 0         | -2.53308221 | C | 0 | 0         | -2.60718547 |
| C | 0 | -1.305082 | -1.91156921 | C | 0 | -1.305082 | -1.98567247 |
| C | 0 | 1.305082  | -1.91156921 | C | 0 | 1.305082  | -1.98567247 |
| C | 0 | -1.580366 | -0.51943921 | C | 0 | -1.580366 | -0.59354247 |
| C | 0 | 1.580366  | -0.51943921 | C | 0 | 1.580366  | -0.59354247 |
| C | 0 | -0.74355  | 0.57406479  | C | 0 | -0.74355  | 0.49996153  |
| H | 0 | -2.642683 | -0.28049921 | H | 0 | -2.642683 | -0.35460247 |
| C | 0 | 0.74355   | 0.57406479  | C | 0 | 0.74355   | 0.49996153  |
| H | 0 | 2.642683  | -0.28049921 | H | 0 | 2.642683  | -0.35460247 |
| C | 0 | -1.163845 | 1.94221679  | C | 0 | -1.163845 | 1.86811353  |
| C | 0 | 1.163845  | 1.94221679  | C | 0 | 1.163845  | 1.86811353  |
| C | 0 | 0         | 2.75844979  | C | 0 | 0         | 2.68434653  |
| C | 0 | -2.429854 | -4.13386821 | C | 0 | -2.429854 | -4.20797147 |
| H | 0 | -3.353322 | -4.70520421 | H | 0 | -3.353322 | -4.77930747 |
| C | 0 | -2.468447 | -2.76269321 | C | 0 | -2.468447 | -2.83679647 |
| H | 0 | -3.434671 | -2.26642321 | H | 0 | -3.434671 | -2.34052647 |
| C | 0 | 2.468447  | -2.76269321 | C | 0 | 2.468447  | -2.83679647 |
| H | 0 | 3.434671  | -2.26642321 | H | 0 | 3.434671  | -2.34052647 |
| C | 0 | 2.429854  | -4.13386821 | C | 0 | 2.429854  | -4.20797147 |
| H | 0 | 3.353322  | -4.70520421 | H | 0 | 3.353322  | -4.77930747 |
| C | 0 | 0         | 4.17774079  | C | 0 | 0         | 4.10363753  |
| C | 0 | -1.306075 | 4.79948979  | C | 0 | -1.306075 | 4.72538653  |
| C | 0 | -1.585021 | 6.18623579  | C | 0 | -1.585021 | 6.11213253  |
| C | 0 | 1.306075  | 4.79948979  | C | 0 | 1.306075  | 4.72538653  |
| C | 0 | -0.744681 | 7.28440779  | C | 0 | -0.744681 | 7.21030453  |
| C | 0 | 1.585021  | 6.18623579  | C | 0 | 1.585021  | 6.11213253  |
| C | 0 | 0.744681  | 7.28440779  | C | 0 | 0.744681  | 7.21030453  |
| H | 0 | -2.646903 | 6.43002279  | H | 0 | -2.646903 | 6.35591953  |
| H | 0 | 2.646903  | 6.43002279  | H | 0 | 2.646903  | 6.35591953  |
| C | 0 | -1.148431 | 8.63746779  | C | 0 | -1.148431 | 8.56336453  |
| C | 0 | 1.148431  | 8.63746779  | C | 0 | 1.148431  | 8.56336453  |
| C | 0 | 2.426537  | 2.57244679  | C | 0 | 2.426537  | 2.49834353  |
| C | 0 | 2.46902   | 3.94382479  | C | 0 | 2.46902   | 3.86972153  |
| H | 0 | 3.349235  | 1.99933279  | H | 0 | 3.349235  | 1.92522953  |
| H | 0 | 3.436075  | 4.43838079  | H | 0 | 3.436075  | 4.36427753  |
| C | 0 | -2.426537 | 2.57244679  | C | 0 | -2.426537 | 2.49834353  |
| C | 0 | -2.46902  | 3.94382479  | C | 0 | -2.46902  | 3.86972153  |
| H | 0 | -3.349235 | 1.99933279  | H | 0 | -3.349235 | 1.92522953  |
| H | 0 | -3.436075 | 4.43838079  | H | 0 | -3.436075 | 4.36427753  |
| H | 0 | 2.176091  | 8.98068479  | H | 0 | 2.176091  | 8.90658153  |
| H | 0 | 0         | 10.52789279 | H | 0 | 0         | 10.45378953 |
| H | 0 | -2.176091 | 8.98068479  | H | 0 | -2.176091 | 8.90658153  |
| N | 0 | 0         | -9.18880421 | B | 0 | 0         | -9.26290747 |
| N | 0 | 0         | 9.44353779  | N | 0 | 0         | 9.36943453  |

**A1[H<sub>N</sub>]A3[P<sub>B</sub>]**

|   |   |           |              |
|---|---|-----------|--------------|
| C | 0 | 1.265996  | -8.52062565  |
| C | 0 | 1.589678  | -7.15634965  |
| C | 0 | -1.265996 | -8.52062565  |
| C | 0 | 0.749116  | -6.05282765  |
| C | 0 | -1.589678 | -7.15634965  |
| C | 0 | -0.749116 | -6.05282765  |
| H | 0 | 0         | -10.20116465 |
| H | 0 | 2.109709  | -9.20527465  |
| H | 0 | 2.655422  | -6.93255965  |
| H | 0 | -2.109709 | -9.20527465  |
| H | 0 | -2.655422 | -6.93255965  |
| C | 0 | 1.165553  | -4.69109765  |

**A1[H<sub>B</sub>P<sub>B</sub>]A3[H<sub>B</sub>P<sub>B</sub>]**

|   |   |           |              |
|---|---|-----------|--------------|
| C | 0 | 1.265996  | -8.59376821  |
| C | 0 | 1.589678  | -7.22949221  |
| C | 0 | -1.265996 | -8.59376821  |
| C | 0 | 0.749116  | -6.12597021  |
| C | 0 | -1.589678 | -7.22949221  |
| C | 0 | -0.749116 | -6.12597021  |
| H | 0 | 0         | -10.27430721 |
| H | 0 | 2.109709  | -9.27841721  |
| H | 0 | 2.655422  | -7.00570221  |
| H | 0 | -2.109709 | -9.27841721  |
| H | 0 | -2.655422 | -7.00570221  |
| C | 0 | 1.165553  | -4.76424021  |

|   |   |           |             |   |   |           |             |
|---|---|-----------|-------------|---|---|-----------|-------------|
| C | 0 | 0         | -3.87539065 | C | 0 | -1.165553 | -4.76424021 |
| C | 0 | -1.165553 | -4.69109765 | C | 0 | -1.305082 | -1.90855421 |
| C | 0 | 0         | -2.45692465 | C | 0 | 1.305082  | -1.90855421 |
| C | 0 | -1.305082 | -1.83541165 | C | 0 | -1.580366 | -0.51642421 |
| C | 0 | 1.305082  | -1.83541165 | C | 0 | 1.580366  | -0.51642421 |
| C | 0 | -1.580366 | -0.44328165 | C | 0 | -0.74355  | 0.57707979  |
| C | 0 | 1.580366  | -0.44328165 | H | 0 | -2.642683 | -0.27748421 |
| C | 0 | -0.74355  | 0.65022235  | C | 0 | 0.74355   | 0.57707979  |
| H | 0 | -2.642683 | -0.20434165 | H | 0 | 2.642683  | -0.27748421 |
| C | 0 | 0.74355   | 0.65022235  | C | 0 | -1.163845 | 1.94523179  |
| H | 0 | 2.642683  | -0.20434165 | C | 0 | 1.163845  | 1.94523179  |
| C | 0 | -1.163845 | 2.01837435  | C | 0 | -2.429854 | -4.13085321 |
| C | 0 | 1.163845  | 2.01837435  | H | 0 | -3.353322 | -4.70218921 |
| C | 0 | 0         | 2.83460735  | C | 0 | -2.468447 | -2.75967821 |
| C | 0 | -2.429854 | -4.05771065 | H | 0 | -3.434671 | -2.26340821 |
| H | 0 | -3.353322 | -4.62904665 | C | 0 | 2.468447  | -2.75967821 |
| C | 0 | -2.468447 | -2.68653565 | H | 0 | 3.434671  | -2.26340821 |
| H | 0 | -3.434671 | -2.19026565 | C | 0 | 2.429854  | -4.13085321 |
| C | 0 | 2.468447  | -2.68653565 | H | 0 | 3.353322  | -4.70218921 |
| H | 0 | 3.434671  | -2.19026565 | C | 0 | -1.306075 | 4.80250479  |
| C | 0 | 2.429854  | -4.05771065 | C | 0 | -1.585021 | 6.18925079  |
| H | 0 | 3.353322  | -4.62904665 | C | 0 | 1.306075  | 4.80250479  |
| C | 0 | 0         | 4.25389835  | C | 0 | -0.744681 | 7.28742279  |
| C | 0 | -1.306075 | 4.87564735  | C | 0 | 1.585021  | 6.18925079  |
| C | 0 | -1.585021 | 6.26239335  | C | 0 | 0.744681  | 7.28742279  |
| C | 0 | 1.306075  | 4.87564735  | H | 0 | -2.646903 | 6.43303779  |
| C | 0 | -0.744681 | 7.36056535  | H | 0 | 2.646903  | 6.43303779  |
| C | 0 | 1.585021  | 6.26239335  | C | 0 | -1.148431 | 8.64048279  |
| C | 0 | 0.744681  | 7.36056535  | C | 0 | 1.148431  | 8.64048279  |
| H | 0 | -2.646903 | 6.50618035  | C | 0 | 2.426537  | 2.57546179  |
| H | 0 | 2.646903  | 6.50618035  | C | 0 | 2.46902   | 3.94683979  |
| C | 0 | -1.148431 | 8.71362535  | H | 0 | 3.349235  | 2.00234779  |
| C | 0 | 1.148431  | 8.71362535  | H | 0 | 3.436075  | 4.44139579  |
| C | 0 | 2.426537  | 2.64860435  | C | 0 | -2.426537 | 2.57546179  |
| C | 0 | 2.46902   | 4.01998235  | C | 0 | -2.46902  | 3.94683979  |
| H | 0 | 3.349235  | 2.07549035  | H | 0 | -3.349235 | 2.00234779  |
| H | 0 | 3.436075  | 4.51453835  | H | 0 | -3.436075 | 4.44139579  |
| C | 0 | -2.426537 | 2.64860435  | H | 0 | 2.176091  | 8.98369979  |
| C | 0 | -2.46902  | 4.01998235  | H | 0 | 0         | 10.53090779 |
| H | 0 | -3.349235 | 2.07549035  | H | 0 | -2.176091 | 8.98369979  |
| H | 0 | -3.436075 | 4.51453835  | B | 0 | 0         | -9.18578921 |
| H | 0 | 2.176091  | 9.05684235  | B | 0 | 0         | -3.94853321 |
| H | 0 | 0         | 10.60405035 | C | 0 | 0         | -2.53006721 |
| H | 0 | -2.176091 | 9.05684235  | C | 0 | 0         | 2.76146479  |
| N | 0 | 0         | -9.11264665 | B | 0 | 0         | 4.18075579  |
| B | 0 | 0         | 9.51969535  | B | 0 | 0         | 9.44655279  |

|   | A1[H <sub>N</sub> P <sub>N</sub> ]A3[H <sub>N</sub> P <sub>N</sub> ] |           |              |   | A1[H <sub>B</sub> P <sub>N</sub> ]A3[H <sub>B</sub> P <sub>N</sub> ] |           |              |
|---|----------------------------------------------------------------------|-----------|--------------|---|----------------------------------------------------------------------|-----------|--------------|
| C | 0                                                                    | 1.260969  | -8.56685391  | C | 0                                                                    | 1.265996  | -8.63810708  |
| C | 0                                                                    | 1.591273  | -7.25766291  | C | 0                                                                    | 1.589678  | -7.27383108  |
| C | 0                                                                    | -1.260969 | -8.56685391  | C | 0                                                                    | -1.265996 | -8.63810708  |
| C | 0                                                                    | 0.708707  | -6.10458891  | C | 0                                                                    | 0.749116  | -6.17030908  |
| C | 0                                                                    | -1.591273 | -7.25766291  | C | 0                                                                    | -1.589678 | -7.27383108  |
| C | 0                                                                    | -0.708707 | -6.10458891  | C | 0                                                                    | -0.749116 | -6.17030908  |
| H | 0                                                                    | 0         | -10.16740391 | H | 0                                                                    | 0         | -10.31864608 |
| H | 0                                                                    | 2.056954  | -9.30507391  | H | 0                                                                    | 2.109709  | -9.32275608  |
| H | 0                                                                    | 2.65772   | -7.05300391  | H | 0                                                                    | 2.655422  | -7.05004108  |
| H | 0                                                                    | -2.056954 | -9.30507391  | H | 0                                                                    | -2.109709 | -9.32275608  |
| H | 0                                                                    | -2.65772  | -7.05300391  | H | 0                                                                    | -2.655422 | -7.05004108  |
| C | 0                                                                    | 1.151847  | -4.75342491  | C | 0                                                                    | 1.165553  | -4.80857908  |
| C | 0                                                                    | -1.151847 | -4.75342491  | C | 0                                                                    | -1.165553 | -4.80857908  |
| C | 0                                                                    | -1.282645 | -1.89681891  | C | 0                                                                    | -1.305082 | -1.95289308  |
| C | 0                                                                    | 1.282645  | -1.89681891  | C | 0                                                                    | 1.305082  | -1.95289308  |



|   |   |           |             |   |   |           |             |
|---|---|-----------|-------------|---|---|-----------|-------------|
| C | 0 | -1.546067 | -0.52901191 | C | 0 | -1.580366 | -0.56076308 |
| C | 0 | 1.546067  | -0.52901191 | C | 0 | 1.580366  | -0.56076308 |
| C | 0 | -0.717908 | 0.60407909  | C | 0 | -0.74355  | 0.53274092  |
| H | 0 | -2.61049  | -0.31811491 | H | 0 | -2.642683 | -0.32182308 |
| C | 0 | 0.717908  | 0.60407909  | C | 0 | 0.74355   | 0.53274092  |
| H | 0 | 2.61049   | -0.31811491 | H | 0 | 2.642683  | -0.32182308 |
| C | 0 | -1.136157 | 1.94321009  | C | 0 | -1.163845 | 1.90089292  |
| C | 0 | 1.136157  | 1.94321009  | C | 0 | 1.163845  | 1.90089292  |
| C | 0 | -2.409477 | -4.12108891 | C | 0 | -2.429854 | -4.17519208 |
| H | 0 | -3.336578 | -4.68620391 | H | 0 | -3.353322 | -4.74652808 |
| C | 0 | -2.438447 | -2.75271691 | C | 0 | -2.468447 | -2.80401708 |
| H | 0 | -3.392791 | -2.23926891 | H | 0 | -3.434671 | -2.30774708 |
| C | 0 | 2.438447  | -2.75271691 | C | 0 | 2.468447  | -2.80401708 |
| H | 0 | 3.392791  | -2.23926891 | H | 0 | 3.434671  | -2.30774708 |
| C | 0 | 2.409477  | -4.12108891 | C | 0 | 2.429854  | -4.17519208 |
| H | 0 | 3.336578  | -4.68620391 | H | 0 | 3.353322  | -4.74652808 |
| C | 0 | -1.314593 | 4.79386109  | C | 0 | -1.306075 | 4.75816592  |
| C | 0 | -1.587139 | 6.15013409  | C | 0 | -1.585021 | 6.14491192  |
| C | 0 | 1.314593  | 4.79386109  | C | 0 | 1.306075  | 4.75816592  |
| C | 0 | -0.722008 | 7.28434809  | C | 0 | -0.744681 | 7.24308392  |
| C | 0 | 1.587139  | 6.15013409  | C | 0 | 1.585021  | 6.14491192  |
| C | 0 | 0.722008  | 7.28434809  | C | 0 | 0.744681  | 7.24308392  |
| H | 0 | -2.646871 | 6.39562709  | H | 0 | -2.646903 | 6.38869892  |
| H | 0 | 2.646871  | 6.39562709  | H | 0 | 2.646903  | 6.38869892  |
| C | 0 | -1.124814 | 8.61291709  | C | 0 | -1.148431 | 8.59614392  |
| C | 0 | 1.124814  | 8.61291709  | C | 0 | 1.148431  | 8.59614392  |
| C | 0 | 2.401894  | 2.56854609  | C | 0 | 2.426537  | 2.53112292  |
| C | 0 | 2.477813  | 3.92275609  | C | 0 | 2.46902   | 3.90250092  |
| H | 0 | 3.296785  | 1.95622609  | H | 0 | 3.349235  | 1.95800892  |
| H | 0 | 3.449572  | 4.40578909  | H | 0 | 3.436075  | 4.39705692  |
| C | 0 | -2.401894 | 2.56854609  | C | 0 | -2.426537 | 2.53112292  |
| C | 0 | -2.477813 | 3.92275609  | C | 0 | -2.46902  | 3.90250092  |
| H | 0 | -3.296785 | 1.95622609  | H | 0 | -3.349235 | 1.95800892  |
| H | 0 | -3.449572 | 4.40578909  | H | 0 | -3.436075 | 4.39705692  |
| H | 0 | 2.115366  | 9.04260009  | H | 0 | 2.176091  | 8.93936092  |
| H | 0 | 0         | 10.40873009 | H | 0 | 0         | 10.48656892 |
| H | 0 | -2.115366 | 9.04260009  | H | 0 | -2.176091 | 8.93936092  |
| N | 0 | 0         | -9.16141091 | B | 0 | 0         | -9.23012808 |
| N | 0 | 0         | 9.40198809  | N | 0 | 0         | -3.99287208 |
| N | 0 | 0         | -3.92222691 | C | 0 | 0         | 2.71712592  |
| N | 0 | 0         | 4.14034409  | C | 0 | 0         | -2.57440608 |
| C | 0 | 0         | -2.54326091 | B | 0 | 0         | 4.13641692  |
| C | 0 | 0         | 2.77300209  | N | 0 | 0         | 9.40221392  |

| A1[H <sub>N</sub> P <sub>B</sub> ]A3[H <sub>N</sub> P <sub>B</sub> ] |   |           |              | A1[H <sub>B</sub> ]A2[H <sub>B</sub> P <sub>B</sub> ]A3[P <sub>B</sub> ] |           |   |              |
|----------------------------------------------------------------------|---|-----------|--------------|--------------------------------------------------------------------------|-----------|---|--------------|
| C                                                                    | 0 | 1.265996  | -8.55340504  | C                                                                        | -1.259729 | 0 | -8.63105269  |
| C                                                                    | 0 | 1.589678  | -7.18912904  | C                                                                        | -1.59234  | 0 | -7.32501569  |
| C                                                                    | 0 | -1.265996 | -8.55340504  | C                                                                        | 1.259729  | 0 | -8.63105269  |
| C                                                                    | 0 | 0.749116  | -6.08560704  | C                                                                        | -0.700322 | 0 | -6.17246769  |
| C                                                                    | 0 | -1.589678 | -7.18912904  | C                                                                        | 1.59234   | 0 | -7.32501569  |
| C                                                                    | 0 | -0.749116 | -6.08560704  | C                                                                        | 0.700322  | 0 | -6.17246769  |
| H                                                                    | 0 | 0         | -10.23394404 | H                                                                        | 0         | 0 | -10.23380269 |
| H                                                                    | 0 | 2.109709  | -9.23805404  | H                                                                        | -2.056657 | 0 | -9.36808869  |
| H                                                                    | 0 | 2.655422  | -6.96533904  | H                                                                        | -2.657372 | 0 | -7.11749969  |
| H                                                                    | 0 | -2.109709 | -9.23805404  | H                                                                        | 2.056657  | 0 | -9.36808869  |
| H                                                                    | 0 | -2.655422 | -6.96533904  | H                                                                        | 2.657372  | 0 | -7.11749969  |
| C                                                                    | 0 | 1.165553  | -4.72387704  | C                                                                        | -1.151214 | 0 | -4.81000669  |
| C                                                                    | 0 | -1.165553 | -4.72387704  | C                                                                        | 0         | 0 | -3.97910669  |
| C                                                                    | 0 | -1.305082 | -1.86819104  | C                                                                        | 1.151214  | 0 | -4.81000669  |
| C                                                                    | 0 | 1.305082  | -1.86819104  | C                                                                        | 1.275312  | 0 | -1.96196069  |
| C                                                                    | 0 | -1.580366 | -0.47606104  | C                                                                        | -1.275312 | 0 | -1.96196069  |
| C                                                                    | 0 | 1.580366  | -0.47606104  | C                                                                        | 1.530405  | 0 | -0.57021669  |
| C                                                                    | 0 | -0.74355  | 0.61744296   | C                                                                        | -1.530405 | 0 | -0.57021669  |

|   |   |           |             |   |           |   |             |
|---|---|-----------|-------------|---|-----------|---|-------------|
| H | 0 | -2.642683 | -0.23712104 | C | 0.739693  | 0 | 0.56123631  |
| C | 0 | 0.74355   | 0.61744296  | H | 2.597382  | 0 | -0.36773469 |
| H | 0 | 2.642683  | -0.23712104 | C | -0.739693 | 0 | 0.56123631  |
| C | 0 | -1.163845 | 1.98559496  | H | -2.597382 | 0 | -0.36773469 |
| C | 0 | 1.163845  | 1.98559496  | C | 1.219407  | 0 | 1.92900331  |
| C | 0 | -2.429854 | -4.09049004 | C | -1.219407 | 0 | 1.92900331  |
| H | 0 | -3.353322 | -4.66182604 | C | 2.396423  | 0 | -4.18302169 |
| C | 0 | -2.468447 | -2.71931504 | H | 3.32674   | 0 | -4.74191769 |
| H | 0 | -3.434671 | -2.22304504 | C | 2.42006   | 0 | -2.80048169 |
| C | 0 | 2.468447  | -2.71931504 | H | 3.374614  | 0 | -2.28894269 |
| H | 0 | 3.434671  | -2.22304504 | C | -2.42006  | 0 | -2.80048169 |
| C | 0 | 2.429854  | -4.09049004 | H | -3.374614 | 0 | -2.28894269 |
| H | 0 | 3.353322  | -4.66182604 | C | -2.396423 | 0 | -4.18302169 |
| C | 0 | -1.306075 | 4.84286796  | H | -3.32674  | 0 | -4.74191769 |
| C | 0 | -1.585021 | 6.22961396  | C | 0         | 0 | 4.28707731  |
| C | 0 | 1.306075  | 4.84286796  | C | 1.306783  | 0 | 4.87006331  |
| C | 0 | -0.744681 | 7.32778596  | C | 1.603732  | 0 | 6.27844731  |
| C | 0 | 1.585021  | 6.22961396  | C | -1.306783 | 0 | 4.87006331  |
| C | 0 | 0.744681  | 7.32778596  | C | 0.747695  | 0 | 7.35511531  |
| H | 0 | -2.646903 | 6.47340096  | C | -1.603732 | 0 | 6.27844731  |
| H | 0 | 2.646903  | 6.47340096  | C | -0.747695 | 0 | 7.35511531  |
| C | 0 | -1.148431 | 8.68084596  | H | 2.663681  | 0 | 6.53112431  |
| C | 0 | 1.148431  | 8.68084596  | H | -2.663681 | 0 | 6.53112431  |
| C | 0 | 2.426537  | 2.61582496  | C | 1.184404  | 0 | 8.71324131  |
| C | 0 | 2.46902   | 3.98720296  | C | -1.184404 | 0 | 8.71324131  |
| H | 0 | 3.349235  | 2.04271096  | C | -2.44928  | 0 | 2.59011231  |
| H | 0 | 3.436075  | 4.48175896  | C | -2.448939 | 0 | 3.99948631  |
| C | 0 | -2.426537 | 2.61582496  | H | -3.415978 | 0 | 2.08431731  |
| C | 0 | -2.46902  | 3.98720296  | H | -3.42025  | 0 | 4.48954031  |
| H | 0 | -3.349235 | 2.04271096  | C | 2.44928   | 0 | 2.59011231  |
| H | 0 | -3.436075 | 4.48175896  | C | 2.448939  | 0 | 3.99948631  |
| H | 0 | 2.176091  | 9.02406296  | H | 3.415978  | 0 | 2.08431731  |
| H | 0 | 0         | 10.57127096 | H | 3.42025   | 0 | 4.48954031  |
| H | 0 | -2.176091 | 9.02406296  | H | -2.254151 | 0 | 8.91825931  |
| N | 0 | 0         | -9.14542604 | H | 2.254151  | 0 | 8.91825931  |
| B | 0 | 0         | -3.90817004 | H | 0         | 0 | 10.85649331 |
| C | 0 | 0         | -2.48970404 | B | 0         | 0 | 2.80052131  |
| C | 0 | 0         | 2.80182796  | B | 0         | 0 | 9.66269231  |
| N | 0 | 0         | 4.22111896  | B | 0         | 0 | -9.22768169 |
| B | 0 | 0         | 9.48691596  | B | 0         | 0 | -2.60721469 |

**A1[H<sub>B</sub>]A2[H<sub>N</sub>P<sub>B</sub>]A3[P<sub>N</sub>]**

|   |             |             |             |
|---|-------------|-------------|-------------|
| C | 8.38948515  | -0.10992736 | 1.38843829  |
| C | 7.11986433  | 0.15100192  | 1.7436043   |
| C | 8.38948515  | -0.10992736 | -1.38843829 |
| C | 6.05676194  | 0.10997581  | 0.7882559   |
| C | 7.11986433  | 0.15100192  | -1.7436043  |
| C | 6.05676194  | 0.10997581  | -0.7882559  |
| H | 8.77811547  | -2.07313785 | 0           |
| H | 9.22442809  | 0.18460098  | 1.98929998  |
| H | 6.90069646  | 0.40007076  | 2.76087561  |
| H | 9.22442809  | 0.18460098  | -1.98929998 |
| H | 6.90069646  | 0.40007076  | -2.76087561 |
| C | 4.70175574  | 0.09473718  | 1.1394608   |
| C | 3.91175366  | 0.08460144  | 0           |
| C | 4.70175574  | 0.09473718  | -1.1394608  |
| C | 1.97429631  | 0.06156023  | -1.36364225 |
| C | 1.97429631  | 0.06156023  | 1.36364225  |
| C | 0.60368017  | 0.04421159  | -1.67431284 |
| C | 0.60368017  | 0.04421159  | 1.67431284  |
| C | -0.45719142 | 0.03111973  | -0.77715789 |
| H | 0.3498318   | 0.04085015  | -2.71376356 |
| C | -0.45719142 | 0.03111973  | 0.77715789  |
| H | 0.3498318   | 0.04085015  | 2.71376356  |

**A1[H<sub>N</sub>]A2[H<sub>B</sub>P<sub>N</sub>]A3[P<sub>B</sub>]**

|   |             |             |             |
|---|-------------|-------------|-------------|
| C | 8.27311317  | 0.05084598  | 1.29366775  |
| C | 6.95765543  | 0.18946422  | 1.61425849  |
| C | 8.27311317  | 0.05084598  | -1.29366775 |
| C | 5.92733319  | 0.14740218  | 0.75778516  |
| C | 6.95765543  | 0.18946422  | -1.61425849 |
| C | 5.92733319  | 0.14740218  | -0.75778516 |
| H | 9.80631893  | 0.03912481  | 0           |
| H | 8.96232542  | 0.24489006  | 2.08874394  |
| H | 6.72406177  | 0.34555565  | 2.64690294  |
| H | 8.96232542  | 0.24489006  | -2.08874394 |
| H | 6.72406177  | 0.34555565  | -2.64690294 |
| C | 4.57377429  | 0.1152284   | 1.12161947  |
| C | 3.838699    | 0.0973216   | 0           |
| C | 4.57377429  | 0.1152284   | -1.12161947 |
| C | 1.76181707  | 0.04716592  | -1.47868338 |
| C | 1.76181707  | 0.04716592  | 1.47868338  |
| C | 0.38616646  | 0.01295234  | -1.73940206 |
| C | 0.38616646  | 0.01295234  | 1.73940206  |
| C | -0.63934504 | 0.00005063  | -0.77354041 |
| H | 0.08651701  | -0.00477556 | -2.76630935 |
| C | -0.63934504 | 0.00005063  | 0.77354041  |
| H | 0.08651701  | -0.00477556 | 2.76630935  |

|   |             |             |             |   |              |             |             |
|---|-------------|-------------|-------------|---|--------------|-------------|-------------|
| C | -1.80832352 | 0.01470453  | -1.18279754 | C | -1.99854381  | -0.06395598 | -1.10986389 |
| C | -1.80832352 | 0.01470453  | 1.18279754  | C | -1.99854381  | -0.06395598 | 1.10986389  |
| C | 4.15795055  | 0.09011581  | -2.40722931 | C | 4.03679553   | 0.10327019  | -2.37949374 |
| H | 4.78151419  | 0.09940634  | -3.27671582 | H | 4.68691069   | 0.12018962  | -3.22907813 |
| C | 2.80865997  | 0.07320187  | -2.51381346 | C | 2.66637918   | 0.0695019   | -2.57226604 |
| H | 2.36052515  | 0.06851764  | -3.48544193 | C | 2.27948792   | 0.06017501  | -3.57004717 |
| C | 2.80865997  | 0.07320187  | 2.51381346  | C | 2.66637918   | 0.0695019   | 2.57226604  |
| H | 2.36052515  | 0.06851764  | 3.48544193  | H | 2.27948792   | 0.06017501  | 3.57004717  |
| C | 4.15795055  | 0.09011581  | 2.40722931  | C | 4.03679553   | 0.10327019  | 2.37949374  |
| H | 4.78151419  | 0.09940634  | 3.27671582  | H | 4.68691069   | 0.12018962  | 3.22907813  |
| C | -4.04840812 | -0.01127535 | 0           | C | -4.13761141  | -0.0848866  | 0           |
| C | -4.67180171 | -0.01841931 | -1.41687287 | C | -4.74097755  | -0.34031925 | -1.39459763 |
| C | -6.04381637 | -0.03363408 | -1.70273966 | C | -6.07463315  | -0.06883476 | -1.72455842 |
| C | -4.67180171 | -0.01841931 | 1.41687287  | C | -4.74097755  | -0.34031925 | 1.39459763  |
| C | -7.08181925 | -0.04463954 | -0.76212138 | C | -7.08912673  | 0.26146898  | -0.80840961 |
| C | -6.04381637 | -0.03363408 | 1.70273966  | C | -6.07463315  | -0.06883476 | 1.72455842  |
| C | -7.08181925 | -0.04463954 | 0.76212138  | C | -7.08912673  | 0.26146898  | 0.80840961  |
| H | -6.32444185 | -0.037085   | -2.73528633 | H | -6.34427561  | -0.11712387 | -2.75899829 |
| H | -6.32444185 | -0.037085   | 2.73528633  | H | -6.34427561  | -0.11712387 | 2.75899829  |
| C | -8.43445773 | -0.05894492 | -1.1136307  | C | -8.36960871  | 0.71003413  | -1.23753111 |
| C | -8.43445773 | -0.05894492 | 1.1136307   | C | -8.36960871  | 0.71003413  | 1.23753111  |
| C | -2.39820543 | 0.00735212  | 2.44706242  | C | -2.51526676  | -0.60829894 | 2.29977998  |
| C | -3.78353938 | -0.00869305 | 2.55336956  | C | -3.9081635   | -0.78987956 | 2.4274263   |
| H | -1.78931461 | 0.01404556  | 3.32689     | H | -1.85756618  | -0.89585558 | 3.09321405  |
| H | -4.21529944 | -0.01408147 | 3.53237493  | H | -4.32204763  | -1.22887973 | 3.31086096  |
| C | -2.39820543 | 0.00735212  | -2.44706242 | C | -2.51526676  | -0.60829894 | -2.29977998 |
| C | -3.78353938 | -0.00869305 | -2.55336956 | C | -3.9081635   | -0.78987956 | -2.4274263  |
| H | -1.78931461 | 0.01404556  | -3.32689    | H | -1.85756618  | -0.89585558 | -3.09321405 |
| H | -4.21529944 | -0.01408147 | -3.53237493 | H | -4.32204763  | -1.22887973 | -3.31086096 |
| H | -8.8092559  | -0.06291805 | 2.11582838  | H | -8.63154816  | 1.20558492  | 2.14913229  |
| H | -8.8092559  | -0.06291805 | -2.11582838 | H | -8.63154816  | 1.20558492  | -2.14913229 |
| H | -           | -0.07747329 | 0           | N | 8.88914571   | -0.35944055 | 0           |
| H | 10.19746348 | -           | 0           | H | -10.34075439 | -0.23094771 | 0           |
| B | -2.61950984 | 0.00524785  | 0           | B | -9.30312241  | 0.33077692  | 0           |
| N | 2.61881226  | 0.06904366  | 0           | N | -2.81913426  | 0.45251871  | 0           |
| N | -9.19752669 | -0.0669659  | 0           | N | -2.81913426  | 0.45251871  | 0           |
| B | 8.56617293  | -0.91232494 | 0           | B | 2.44345647   | 0.06382067  | 0           |

**A1[H<sub>N</sub>]A2[H<sub>N</sub>P<sub>N</sub>]A3[P<sub>N</sub>]**

|   |   |           |              |
|---|---|-----------|--------------|
| C | 0 | 1.265996  | -8.59767753  |
| C | 0 | 1.589678  | -7.23340153  |
| C | 0 | -1.265996 | -8.59767753  |
| C | 0 | 0.749116  | -6.12987953  |
| C | 0 | -1.589678 | -7.23340153  |
| C | 0 | -0.749116 | -6.12987953  |
| H | 0 | 0         | -10.27821653 |
| H | 0 | 2.109709  | -9.28232653  |
| H | 0 | 2.655422  | -7.00961153  |
| H | 0 | -2.109709 | -9.28232653  |
| H | 0 | -2.655422 | -7.00961153  |
| C | 0 | 1.165553  | -4.76814953  |
| C | 0 | 0         | -3.95244253  |
| C | 0 | -1.165553 | -4.76814953  |
| C | 0 | -1.305082 | -1.91246353  |
| C | 0 | 1.305082  | -1.91246353  |
| C | 0 | -1.580366 | -0.52033353  |
| C | 0 | 1.580366  | -0.52033353  |
| C | 0 | -0.74355  | 0.57317047   |
| H | 0 | -2.642683 | -0.28139353  |
| C | 0 | 0.74355   | 0.57317047   |
| H | 0 | 2.642683  | -0.28139353  |
| C | 0 | -1.163845 | 1.94132247   |
| C | 0 | 1.163845  | 1.94132247   |
| C | 0 | -2.429854 | -4.13476253  |

**A1[H<sub>B</sub>P<sub>B</sub>]A2[H<sub>B</sub>P<sub>B</sub>]A3[H<sub>B</sub>P<sub>B</sub>]**

|   |   |           |              |
|---|---|-----------|--------------|
| C | 0 | 1.265996  | -8.59281202  |
| C | 0 | 1.589678  | -7.22853602  |
| C | 0 | -1.265996 | -8.59281202  |
| C | 0 | 0.749116  | -6.12501402  |
| C | 0 | -1.589678 | -7.22853602  |
| C | 0 | -0.749116 | -6.12501402  |
| H | 0 | 0         | -10.27335102 |
| H | 0 | 2.109709  | -9.27746102  |
| H | 0 | 2.655422  | -7.00474602  |
| H | 0 | -2.109709 | -9.27746102  |
| H | 0 | -2.655422 | -7.00474602  |
| C | 0 | 1.165553  | -4.76328402  |
| C | 0 | -1.165553 | -4.76328402  |
| C | 0 | -1.305082 | -1.90759802  |
| C | 0 | 1.305082  | -1.90759802  |
| C | 0 | -1.580366 | -0.51546802  |
| C | 0 | 1.580366  | -0.51546802  |
| C | 0 | -0.74355  | 0.57803598   |
| H | 0 | -2.642683 | -0.27652802  |
| C | 0 | 0.74355   | 0.57803598   |
| H | 0 | 2.642683  | -0.27652802  |
| C | 0 | -1.163845 | 1.94618798   |
| C | 0 | 1.163845  | 1.94618798   |
| C | 0 | -2.429854 | -4.12989702  |
| H | 0 | -3.353322 | -4.70123302  |

|   |   |           |             |   |   |           |             |
|---|---|-----------|-------------|---|---|-----------|-------------|
| H | 0 | -3.353322 | -4.70609853 | C | 0 | -2.468447 | -2.75872202 |
| C | 0 | -2.468447 | -2.76358753 | H | 0 | -3.434671 | -2.26245202 |
| H | 0 | -3.434671 | -2.26731753 | C | 0 | 2.468447  | -2.75872202 |
| C | 0 | 2.468447  | -2.76358753 | H | 0 | 3.434671  | -2.26245202 |
| H | 0 | 3.434671  | -2.26731753 | C | 0 | 2.429854  | -4.12989702 |
| C | 0 | 2.429854  | -4.13476253 | H | 0 | 3.353322  | -4.70123302 |
| H | 0 | 3.353322  | -4.70609853 | C | 0 | -1.306075 | 4.80346098  |
| C | 0 | 0         | 4.17684647  | C | 0 | -1.585021 | 6.19020698  |
| C | 0 | -1.306075 | 4.79859547  | C | 0 | 1.306075  | 4.80346098  |
| C | 0 | -1.585021 | 6.18534147  | C | 0 | -0.744681 | 7.28837898  |
| C | 0 | 1.306075  | 4.79859547  | C | 0 | 1.585021  | 6.19020698  |
| C | 0 | -0.744681 | 7.28351347  | C | 0 | 0.744681  | 7.28837898  |
| C | 0 | 1.585021  | 6.18534147  | H | 0 | -2.646903 | 6.43399398  |
| C | 0 | 0.744681  | 7.28351347  | H | 0 | 2.646903  | 6.43399398  |
| H | 0 | -2.646903 | 6.42912847  | C | 0 | -1.148431 | 8.64143898  |
| H | 0 | 2.646903  | 6.42912847  | C | 0 | 1.148431  | 8.64143898  |
| C | 0 | -1.148431 | 8.63657347  | C | 0 | 2.426537  | 2.57641798  |
| C | 0 | 1.148431  | 8.63657347  | C | 0 | 2.46902   | 3.94779598  |
| C | 0 | 2.426537  | 2.57155247  | H | 0 | 3.349235  | 2.00330398  |
| C | 0 | 2.46902   | 3.94293047  | H | 0 | 3.436075  | 4.44235198  |
| H | 0 | 3.349235  | 1.99843847  | C | 0 | -2.426537 | 2.57641798  |
| H | 0 | 3.436075  | 4.43748647  | C | 0 | -2.46902  | 3.94779598  |
| C | 0 | -2.426537 | 2.57155247  | H | 0 | -3.349235 | 2.00330398  |
| C | 0 | -2.46902  | 3.94293047  | H | 0 | -3.436075 | 4.44235198  |
| H | 0 | -3.349235 | 1.99843847  | H | 0 | 2.176091  | 8.98465598  |
| H | 0 | -3.436075 | 4.43748647  | H | 0 | 0         | 10.53186398 |
| H | 0 | 2.176091  | 8.97979047  | H | 0 | -2.176091 | 8.98465598  |
| H | 0 | 0         | 10.52699847 | B | 0 | 0         | 9.44750898  |
| H | 0 | -2.176091 | 8.97979047  | B | 0 | 0         | 4.18171198  |
| N | 0 | 0         | -9.18969853 | B | 0 | 0         | 2.76242098  |
| N | 0 | 0         | 9.44264347  | B | 0 | 0         | -2.52911102 |
| N | 0 | 0         | 2.75755547  | B | 0 | 0         | -3.94757702 |
| N | 0 | 0         | -2.53397653 | B | 0 | 0         | -9.18483302 |

**A1[H<sub>B</sub>P<sub>N</sub>]A2[H<sub>B</sub>P<sub>N</sub>]A3[H<sub>B</sub>P<sub>N</sub>]**

|   |   |           |             |
|---|---|-----------|-------------|
| C | 0 | 1.265996  | -8.6594439  |
| C | 0 | 1.589678  | -7.2951679  |
| C | 0 | -1.265996 | -8.6594439  |
| C | 0 | 0.749116  | -6.1916459  |
| C | 0 | -1.589678 | -7.2951679  |
| C | 0 | -0.749116 | -6.1916459  |
| H | 0 | 0         | -10.3399829 |
| H | 0 | 2.109709  | -9.3440929  |
| H | 0 | 2.655422  | -7.0713779  |
| H | 0 | -2.109709 | -9.3440929  |
| H | 0 | -2.655422 | -7.0713779  |
| C | 0 | 1.165553  | -4.8299159  |
| C | 0 | -1.165553 | -4.8299159  |
| C | 0 | -1.305082 | -1.9742299  |
| C | 0 | 1.305082  | -1.9742299  |
| C | 0 | -1.580366 | -0.5820999  |
| C | 0 | 1.580366  | -0.5820999  |
| C | 0 | -0.74355  | 0.5114041   |
| H | 0 | -2.642683 | -0.3431599  |
| C | 0 | 0.74355   | 0.5114041   |
| H | 0 | 2.642683  | -0.3431599  |
| C | 0 | -1.163845 | 1.8795561   |
| C | 0 | 1.163845  | 1.8795561   |
| C | 0 | -2.429854 | -4.1965289  |
| H | 0 | -3.353322 | -4.7678649  |
| C | 0 | -2.468447 | -2.8253539  |
| H | 0 | -3.434671 | -2.3290839  |
| C | 0 | 2.468447  | -2.8253539  |
| H | 0 | 3.434671  | -2.3290839  |

**A1[H<sub>N</sub>P<sub>B</sub>]A2[H<sub>N</sub>P<sub>B</sub>]A3[H<sub>N</sub>P<sub>B</sub>]**

|   |   |           |              |
|---|---|-----------|--------------|
| C | 0 | 1.265996  | -8.53206822  |
| C | 0 | 1.589678  | -7.16779222  |
| C | 0 | -1.265996 | -8.53206822  |
| C | 0 | 0.749116  | -6.06427022  |
| C | 0 | -1.589678 | -7.16779222  |
| C | 0 | -0.749116 | -6.06427022  |
| H | 0 | 0         | -10.21260722 |
| H | 0 | 2.109709  | -9.21671722  |
| H | 0 | 2.655422  | -6.94400222  |
| H | 0 | -2.109709 | -9.21671722  |
| H | 0 | -2.655422 | -6.94400222  |
| C | 0 | 1.165553  | -4.70254022  |
| C | 0 | -1.165553 | -4.70254022  |
| C | 0 | -1.305082 | -1.84685422  |
| C | 0 | 1.305082  | -1.84685422  |
| C | 0 | -1.580366 | -0.45472422  |
| C | 0 | 1.580366  | -0.45472422  |
| C | 0 | -0.74355  | 0.63877978   |
| H | 0 | -2.642683 | -0.21578422  |
| C | 0 | 0.74355   | 0.63877978   |
| H | 0 | 2.642683  | -0.21578422  |
| C | 0 | -1.163845 | 2.00693178   |
| C | 0 | 1.163845  | 2.00693178   |
| C | 0 | -2.429854 | -4.06915322  |
| H | 0 | -3.353322 | -4.64048922  |
| C | 0 | -2.468447 | -2.69797822  |
| H | 0 | -3.434671 | -2.20170822  |
| C | 0 | 2.468447  | -2.69797822  |
| H | 0 | 3.434671  | -2.20170822  |

|   |   |           |            |   |   |           |             |
|---|---|-----------|------------|---|---|-----------|-------------|
| C | 0 | 2.429854  | -4.1965289 | C | 0 | 2.429854  | -4.06915322 |
| H | 0 | 3.353322  | -4.7678649 | H | 0 | 3.353322  | -4.64048922 |
| C | 0 | -1.306075 | 4.7368291  | C | 0 | -1.306075 | 4.86420478  |
| C | 0 | -1.585021 | 6.1235751  | C | 0 | -1.585021 | 6.25095078  |
| C | 0 | 1.306075  | 4.7368291  | C | 0 | 1.306075  | 4.86420478  |
| C | 0 | -0.744681 | 7.2217471  | C | 0 | -0.744681 | 7.34912278  |
| C | 0 | 1.585021  | 6.1235751  | C | 0 | 1.585021  | 6.25095078  |
| C | 0 | 0.744681  | 7.2217471  | C | 0 | 0.744681  | 7.34912278  |
| H | 0 | -2.646903 | 6.3673621  | H | 0 | -2.646903 | 6.49473778  |
| H | 0 | 2.646903  | 6.3673621  | H | 0 | 2.646903  | 6.49473778  |
| C | 0 | -1.148431 | 8.5748071  | C | 0 | -1.148431 | 8.70218278  |
| C | 0 | 1.148431  | 8.5748071  | C | 0 | 1.148431  | 8.70218278  |
| C | 0 | 2.426537  | 2.5097861  | C | 0 | 2.426537  | 2.63716178  |
| C | 0 | 2.46902   | 3.8811641  | C | 0 | 2.46902   | 4.00853978  |
| H | 0 | 3.349235  | 1.9366721  | H | 0 | 3.349235  | 2.06404778  |
| H | 0 | 3.436075  | 4.3757201  | H | 0 | 3.436075  | 4.50309578  |
| C | 0 | -2.426537 | 2.5097861  | C | 0 | -2.426537 | 2.63716178  |
| C | 0 | -2.46902  | 3.8811641  | C | 0 | -2.46902  | 4.00853978  |
| H | 0 | -3.349235 | 1.9366721  | H | 0 | -3.349235 | 2.06404778  |
| H | 0 | -3.436075 | 4.3757201  | H | 0 | -3.436075 | 4.50309578  |
| H | 0 | 2.176091  | 8.9180241  | H | 0 | 2.176091  | 9.04539978  |
| H | 0 | 0         | 10.4652321 | H | 0 | 0         | 10.59260778 |
| H | 0 | -2.176091 | 8.9180241  | H | 0 | -2.176091 | 9.04539978  |
| N | 0 | 0         | 9.3808771  | B | 0 | 0         | 9.50825278  |
| N | 0 | 0         | 2.6957891  | B | 0 | 0         | 2.82316478  |
| N | 0 | 0         | -4.0142089 | B | 0 | 0         | -3.88683322 |
| B | 0 | 0         | 4.1150801  | N | 0 | 0         | 4.24245578  |
| B | 0 | 0         | -2.5957429 | N | 0 | 0         | -2.46836722 |
| B | 0 | 0         | -9.2514649 | N | 0 | 0         | -9.12408922 |

**A1[H<sub>N</sub>P<sub>N</sub>]A2[H<sub>N</sub>P<sub>N</sub>]A3[H<sub>N</sub>P<sub>N</sub>]**

|   |   |           |              |
|---|---|-----------|--------------|
| C | 0 | 1.265996  | -8.59856101  |
| C | 0 | 1.589678  | -7.23428501  |
| C | 0 | -1.265996 | -8.59856101  |
| C | 0 | 0.749116  | -6.13076301  |
| C | 0 | -1.589678 | -7.23428501  |
| C | 0 | -0.749116 | -6.13076301  |
| H | 0 | 0         | -10.27910001 |
| H | 0 | 2.109709  | -9.28321001  |
| H | 0 | 2.655422  | -7.01049501  |
| H | 0 | -2.109709 | -9.28321001  |
| H | 0 | -2.655422 | -7.01049501  |
| C | 0 | 1.165553  | -4.76903301  |
| C | 0 | -1.165553 | -4.76903301  |
| C | 0 | -1.305082 | -1.91334701  |
| C | 0 | 1.305082  | -1.91334701  |
| C | 0 | -1.580366 | -0.52121701  |
| C | 0 | 1.580366  | -0.52121701  |
| C | 0 | -0.74355  | 0.57228699   |
| H | 0 | -2.642683 | -0.28227701  |
| C | 0 | 0.74355   | 0.57228699   |
| H | 0 | 2.642683  | -0.28227701  |
| C | 0 | -1.163845 | 1.94043899   |
| C | 0 | 1.163845  | 1.94043899   |
| C | 0 | -2.429854 | -4.13564601  |
| H | 0 | -3.353322 | -4.70698201  |
| C | 0 | -2.468447 | -2.76447101  |
| H | 0 | -3.434671 | -2.26820101  |
| C | 0 | 2.468447  | -2.76447101  |
| H | 0 | 3.434671  | -2.26820101  |
| C | 0 | 2.429854  | -4.13564601  |
| H | 0 | 3.353322  | -4.70698201  |
| C | 0 | -1.306075 | 4.79771199   |
| C | 0 | -1.585021 | 6.18445799   |

**A2[H<sub>B</sub>P<sub>B</sub>]**

|   |   |           |              |
|---|---|-----------|--------------|
| C | 0 | 1.265996  | -8.59483158  |
| C | 0 | 1.589678  | -7.23055558  |
| C | 0 | -1.265996 | -8.59483158  |
| C | 0 | 0.749116  | -6.12703358  |
| C | 0 | -1.589678 | -7.23055558  |
| C | 0 | -0.749116 | -6.12703358  |
| H | 0 | 0         | -10.27537058 |
| H | 0 | 2.109709  | -9.27948058  |
| H | 0 | 2.655422  | -7.00676558  |
| H | 0 | -2.109709 | -9.27948058  |
| H | 0 | -2.655422 | -7.00676558  |
| C | 0 | 1.165553  | -4.76530358  |
| C | 0 | 0         | -3.94959658  |
| C | 0 | -1.165553 | -4.76530358  |
| C | 0 | -1.305082 | -1.90961758  |
| C | 0 | 1.305082  | -1.90961758  |
| C | 0 | -1.580366 | -0.51748758  |
| C | 0 | 1.580366  | -0.51748758  |
| C | 0 | -0.74355  | 0.57601642   |
| H | 0 | -2.642683 | -0.27854758  |
| C | 0 | 0.74355   | 0.57601642   |
| H | 0 | 2.642683  | -0.27854758  |
| C | 0 | -1.163845 | 1.94416842   |
| C | 0 | 1.163845  | 1.94416842   |
| C | 0 | -2.429854 | -4.13191658  |
| H | 0 | -3.353322 | -4.70325258  |
| C | 0 | -2.468447 | -2.76074158  |
| H | 0 | -3.434671 | -2.26447158  |
| C | 0 | 2.468447  | -2.76074158  |
| H | 0 | 3.434671  | -2.26447158  |
| C | 0 | 2.429854  | -4.13191658  |
| H | 0 | 3.353322  | -4.70325258  |
| C | 0 | 0         | 4.17969242   |

|   |   |           |             |   |   |           |             |
|---|---|-----------|-------------|---|---|-----------|-------------|
| C | 0 | 1.306075  | 4.79771199  | C | 0 | -1.306075 | 4.80144142  |
| C | 0 | -0.744681 | 7.28262999  | C | 0 | -1.585021 | 6.18818742  |
| C | 0 | 1.585021  | 6.18445799  | C | 0 | 1.306075  | 4.80144142  |
| C | 0 | 0.744681  | 7.28262999  | C | 0 | -0.744681 | 7.28635942  |
| H | 0 | -2.646903 | 6.42824499  | C | 0 | 1.585021  | 6.18818742  |
| H | 0 | 2.646903  | 6.42824499  | C | 0 | 0.744681  | 7.28635942  |
| C | 0 | -1.148431 | 8.63568999  | H | 0 | -2.646903 | 6.43197442  |
| C | 0 | 1.148431  | 8.63568999  | H | 0 | 2.646903  | 6.43197442  |
| C | 0 | 2.426537  | 2.57066899  | C | 0 | -1.148431 | 8.63941942  |
| C | 0 | 2.46902   | 3.94204699  | C | 0 | 1.148431  | 8.63941942  |
| H | 0 | 3.349235  | 1.99755499  | C | 0 | 2.426537  | 2.57439842  |
| H | 0 | 3.436075  | 4.43660299  | C | 0 | 2.46902   | 3.94577642  |
| C | 0 | -2.426537 | 2.57066899  | H | 0 | 3.349235  | 2.00128442  |
| C | 0 | -2.46902  | 3.94204699  | H | 0 | 3.436075  | 4.44033242  |
| H | 0 | -3.349235 | 1.99755499  | C | 0 | -2.426537 | 2.57439842  |
| H | 0 | -3.436075 | 4.43660299  | C | 0 | -2.46902  | 3.94577642  |
| H | 0 | 2.176091  | 8.97890699  | H | 0 | -3.349235 | 2.00128442  |
| H | 0 | 0         | 10.52611499 | H | 0 | -3.436075 | 4.44033242  |
| H | 0 | -2.176091 | 8.97890699  | H | 0 | 2.176091  | 8.98263642  |
| N | 0 | 0         | 9.44175999  | H | 0 | 0         | 10.52984442 |
| N | 0 | 0         | 4.17596299  | H | 0 | -2.176091 | 8.98263642  |
| N | 0 | 0         | 2.75667199  | C | 0 | 0         | 9.44548942  |
| N | 0 | 0         | -2.53486001 | C | 0 | 0         | -9.18685258 |
| N | 0 | 0         | -3.95332601 | B | 0 | 0         | 2.76040142  |
| N | 0 | 0         | -9.19058201 | B | 0 | 0         | -2.53113058 |

| A2[H <sub>B</sub> P <sub>N</sub> ] |   |           |              | A2[H <sub>N</sub> P <sub>B</sub> ] |   |           |              |
|------------------------------------|---|-----------|--------------|------------------------------------|---|-----------|--------------|
| C                                  | 0 | 1.265996  | -8.61709288  | C                                  | 0 | 1.265996  | -8.57441924  |
| C                                  | 0 | 1.589678  | -7.25281688  | C                                  | 0 | 1.589678  | -7.21014324  |
| C                                  | 0 | -1.265996 | -8.61709288  | C                                  | 0 | -1.265996 | -8.57441924  |
| C                                  | 0 | 0.749116  | -6.14929488  | C                                  | 0 | 0.749116  | -6.10662124  |
| C                                  | 0 | -1.589678 | -7.25281688  | C                                  | 0 | -1.589678 | -7.21014324  |
| C                                  | 0 | -0.749116 | -6.14929488  | C                                  | 0 | -0.749116 | -6.10662124  |
| H                                  | 0 | 0         | -10.29763188 | H                                  | 0 | 0         | -10.25495824 |
| H                                  | 0 | 2.109709  | -9.30174188  | H                                  | 0 | 2.109709  | -9.25906824  |
| H                                  | 0 | 2.655422  | -7.02902688  | H                                  | 0 | 2.655422  | -6.98635324  |
| H                                  | 0 | -2.109709 | -9.30174188  | H                                  | 0 | -2.109709 | -9.25906824  |
| H                                  | 0 | -2.655422 | -7.02902688  | H                                  | 0 | -2.655422 | -6.98635324  |
| C                                  | 0 | 1.165553  | -4.78756488  | C                                  | 0 | 1.165553  | -4.74489124  |
| C                                  | 0 | 0         | -3.97185788  | C                                  | 0 | 0         | -3.92918424  |
| C                                  | 0 | -1.165553 | -4.78756488  | C                                  | 0 | -1.165553 | -4.74489124  |
| C                                  | 0 | -1.305082 | -1.93187888  | C                                  | 0 | -1.305082 | -1.88920524  |
| C                                  | 0 | 1.305082  | -1.93187888  | C                                  | 0 | 1.305082  | -1.88920524  |
| C                                  | 0 | -1.580366 | -0.53974888  | C                                  | 0 | -1.580366 | -0.49707524  |
| C                                  | 0 | 1.580366  | -0.53974888  | C                                  | 0 | 1.580366  | -0.49707524  |
| C                                  | 0 | -0.74355  | 0.55375512   | C                                  | 0 | -0.74355  | 0.59642876   |
| H                                  | 0 | -2.642683 | -0.30080888  | H                                  | 0 | -2.642683 | -0.25813524  |
| C                                  | 0 | 0.74355   | 0.55375512   | C                                  | 0 | 0.74355   | 0.59642876   |
| H                                  | 0 | 2.642683  | -0.30080888  | H                                  | 0 | 2.642683  | -0.25813524  |
| C                                  | 0 | -1.163845 | 1.92190712   | C                                  | 0 | -1.163845 | 1.96458076   |
| C                                  | 0 | 1.163845  | 1.92190712   | C                                  | 0 | 1.163845  | 1.96458076   |
| C                                  | 0 | -2.429854 | -4.15417788  | C                                  | 0 | -2.429854 | -4.11150424  |
| H                                  | 0 | -3.353322 | -4.72551388  | H                                  | 0 | -3.353322 | -4.68284024  |
| C                                  | 0 | -2.468447 | -2.78300288  | C                                  | 0 | -2.468447 | -2.74032924  |
| H                                  | 0 | -3.434671 | -2.28673288  | H                                  | 0 | -3.434671 | -2.24405924  |
| C                                  | 0 | 2.468447  | -2.78300288  | C                                  | 0 | 2.468447  | -2.74032924  |
| H                                  | 0 | 3.434671  | -2.28673288  | H                                  | 0 | 3.434671  | -2.24405924  |
| C                                  | 0 | 2.429854  | -4.15417788  | C                                  | 0 | 2.429854  | -4.11150424  |
| H                                  | 0 | 3.353322  | -4.72551388  | H                                  | 0 | 3.353322  | -4.68284024  |
| C                                  | 0 | 0         | 4.15743112   | C                                  | 0 | 0         | 4.20010476   |
| C                                  | 0 | -1.306075 | 4.77918012   | C                                  | 0 | -1.306075 | 4.82185376   |
| C                                  | 0 | -1.585021 | 6.16592612   | C                                  | 0 | -1.585021 | 6.20859976   |
| C                                  | 0 | 1.306075  | 4.77918012   | C                                  | 0 | 1.306075  | 4.82185376   |

|   |   |           |             |   |   |           |             |
|---|---|-----------|-------------|---|---|-----------|-------------|
| C | 0 | -0.744681 | 7.26409812  | C | 0 | -0.744681 | 7.30677176  |
| C | 0 | 1.585021  | 6.16592612  | C | 0 | 1.585021  | 6.20859976  |
| C | 0 | 0.744681  | 7.26409812  | C | 0 | 0.744681  | 7.30677176  |
| H | 0 | -2.646903 | 6.40971312  | H | 0 | -2.646903 | 6.45238676  |
| H | 0 | 2.646903  | 6.40971312  | H | 0 | 2.646903  | 6.45238676  |
| C | 0 | -1.148431 | 8.61715812  | C | 0 | -1.148431 | 8.65983176  |
| C | 0 | 1.148431  | 8.61715812  | C | 0 | 1.148431  | 8.65983176  |
| C | 0 | 2.426537  | 2.55213712  | C | 0 | 2.426537  | 2.59481076  |
| C | 0 | 2.46902   | 3.92351512  | C | 0 | 2.46902   | 3.96618876  |
| H | 0 | 3.349235  | 1.97902312  | H | 0 | 3.349235  | 2.02169676  |
| H | 0 | 3.436075  | 4.41807112  | H | 0 | 3.436075  | 4.46074476  |
| C | 0 | -2.426537 | 2.55213712  | C | 0 | -2.426537 | 2.59481076  |
| C | 0 | -2.46902  | 3.92351512  | C | 0 | -2.46902  | 3.96618876  |
| H | 0 | -3.349235 | 1.97902312  | H | 0 | -3.349235 | 2.02169676  |
| H | 0 | -3.436075 | 4.41807112  | H | 0 | -3.436075 | 4.46074476  |
| H | 0 | 2.176091  | 8.96037512  | H | 0 | 2.176091  | 9.00304876  |
| H | 0 | 0         | 10.50758312 | H | 0 | 0         | 10.55025676 |
| H | 0 | -2.176091 | 8.96037512  | H | 0 | -2.176091 | 9.00304876  |
| C | 0 | 0         | 9.42322812  | C | 0 | 0         | 9.46590176  |
| C | 0 | 0         | -9.20911388 | C | 0 | 0         | -9.16644024 |
| N | 0 | 0         | 2.73814012  | B | 0 | 0         | 2.78081376  |
| B | 0 | 0         | -2.55339188 | N | 0 | 0         | -2.51071824 |

| A2[H <sub>N</sub> P <sub>N</sub> ] |   |           |              | A1[H <sub>B</sub> P <sub>B</sub> ] |   |           |              |
|------------------------------------|---|-----------|--------------|------------------------------------|---|-----------|--------------|
| C                                  | 0 | 1.265996  | -8.59666575  | C                                  | 0 | 0         | -9.13239766  |
| C                                  | 0 | 1.589678  | -7.23238975  | C                                  | 0 | 1.265996  | -8.54037666  |
| C                                  | 0 | -1.265996 | -8.59666575  | C                                  | 0 | 1.589678  | -7.17610066  |
| C                                  | 0 | 0.749116  | -6.12886775  | C                                  | 0 | -1.265996 | -8.54037666  |
| C                                  | 0 | -1.589678 | -7.23238975  | C                                  | 0 | 0.749116  | -6.07257866  |
| C                                  | 0 | -0.749116 | -6.12886775  | C                                  | 0 | -1.589678 | -7.17610066  |
| H                                  | 0 | 0         | -10.27720475 | C                                  | 0 | -0.749116 | -6.07257866  |
| H                                  | 0 | 2.109709  | -9.28131475  | H                                  | 0 | 0         | -10.22091566 |
| H                                  | 0 | 2.655422  | -7.00859975  | H                                  | 0 | 2.109709  | -9.22502566  |
| H                                  | 0 | -2.109709 | -9.28131475  | H                                  | 0 | 2.655422  | -6.95231066  |
| H                                  | 0 | -2.655422 | -7.00859975  | H                                  | 0 | -2.109709 | -9.22502566  |
| C                                  | 0 | 1.165553  | -4.76713775  | H                                  | 0 | -2.655422 | -6.95231066  |
| C                                  | 0 | 0         | -3.95143075  | C                                  | 0 | 1.165553  | -4.71084866  |
| C                                  | 0 | -1.165553 | -4.76713775  | C                                  | 0 | 0         | -3.89514166  |
| C                                  | 0 | -1.305082 | -1.91145175  | C                                  | 0 | -1.165553 | -4.71084866  |
| C                                  | 0 | 1.305082  | -1.91145175  | C                                  | 0 | 0         | -2.47667566  |
| C                                  | 0 | -1.580366 | -0.51932175  | C                                  | 0 | -1.305082 | -1.85516266  |
| C                                  | 0 | 1.580366  | -0.51932175  | C                                  | 0 | 1.305082  | -1.85516266  |
| C                                  | 0 | -0.74355  | 0.57418225   | C                                  | 0 | -1.580366 | -0.46303266  |
| H                                  | 0 | -2.642683 | -0.28038175  | C                                  | 0 | 1.580366  | -0.46303266  |
| C                                  | 0 | 0.74355   | 0.57418225   | C                                  | 0 | -0.74355  | 0.63047134   |
| H                                  | 0 | 2.642683  | -0.28038175  | H                                  | 0 | -2.642683 | -0.22409266  |
| C                                  | 0 | -1.163845 | 1.94233425   | C                                  | 0 | 0.74355   | 0.63047134   |
| C                                  | 0 | 1.163845  | 1.94233425   | H                                  | 0 | 2.642683  | -0.22409266  |
| C                                  | 0 | -2.429854 | -4.13375075  | C                                  | 0 | -1.163845 | 1.99862334   |
| H                                  | 0 | -3.353322 | -4.70508675  | C                                  | 0 | 1.163845  | 1.99862334   |
| C                                  | 0 | -2.468447 | -2.76257575  | C                                  | 0 | 0         | 2.81485634   |
| H                                  | 0 | -3.434671 | -2.26630575  | C                                  | 0 | -2.429854 | -4.07746166  |
| C                                  | 0 | 2.468447  | -2.76257575  | H                                  | 0 | -3.353322 | -4.64879766  |
| H                                  | 0 | 3.434671  | -2.26630575  | C                                  | 0 | -2.468447 | -2.70628666  |
| C                                  | 0 | 2.429854  | -4.13375075  | H                                  | 0 | -3.434671 | -2.21001666  |
| H                                  | 0 | 3.353322  | -4.70508675  | C                                  | 0 | 2.468447  | -2.70628666  |
| C                                  | 0 | 0         | 4.17785825   | H                                  | 0 | 3.434671  | -2.21001666  |
| C                                  | 0 | -1.306075 | 4.79960725   | C                                  | 0 | 2.429854  | -4.07746166  |
| C                                  | 0 | -1.585021 | 6.18635325   | H                                  | 0 | 3.353322  | -4.64879766  |
| C                                  | 0 | 1.306075  | 4.79960725   | C                                  | 0 | -1.306075 | 4.85589634   |
| C                                  | 0 | -0.744681 | 7.28452525   | C                                  | 0 | -1.585021 | 6.24264234   |
| C                                  | 0 | 1.585021  | 6.18635325   | C                                  | 0 | 1.306075  | 4.85589634   |
| C                                  | 0 | 0.744681  | 7.28452525   | C                                  | 0 | -0.744681 | 7.34081434   |
| H                                  | 0 | -2.646903 | 6.43014025   | C                                  | 0 | 1.585021  | 6.24264234   |

|   |   |           |             |   |   |           |             |
|---|---|-----------|-------------|---|---|-----------|-------------|
| H | 0 | 2.646903  | 6.43014025  | C | 0 | 0.744681  | 7.34081434  |
| C | 0 | -1.148431 | 8.63758525  | H | 0 | -2.646903 | 6.48642934  |
| C | 0 | 1.148431  | 8.63758525  | H | 0 | 2.646903  | 6.48642934  |
| C | 0 | 2.426537  | 2.57256425  | C | 0 | -1.148431 | 8.69387434  |
| C | 0 | 2.46902   | 3.94394225  | C | 0 | 1.148431  | 8.69387434  |
| H | 0 | 3.349235  | 1.99945025  | C | 0 | 2.426537  | 2.62885334  |
| H | 0 | 3.436075  | 4.43849825  | C | 0 | 2.46902   | 4.00023134  |
| C | 0 | -2.426537 | 2.57256425  | H | 0 | 3.349235  | 2.05573934  |
| C | 0 | -2.46902  | 3.94394225  | H | 0 | 3.436075  | 4.49478734  |
| H | 0 | -3.349235 | 1.99945025  | C | 0 | -2.426537 | 2.62885334  |
| H | 0 | -3.436075 | 4.43849825  | C | 0 | -2.46902  | 4.00023134  |
| H | 0 | 2.176091  | 8.98080225  | H | 0 | -3.349235 | 2.05573934  |
| H | 0 | 0         | 10.52801025 | H | 0 | -3.436075 | 4.49478734  |
| H | 0 | -2.176091 | 8.98080225  | H | 0 | 2.176091  | 9.03709134  |
| C | 0 | 0         | 9.44365525  | H | 0 | 0         | 10.58429934 |
| C | 0 | 0         | -9.18868675 | H | 0 | -2.176091 | 9.03709134  |
| N | 0 | 0         | 2.75856725  | B | 0 | 0         | 9.49994434  |
| N | 0 | 0         | -2.53296475 | B | 0 | 0         | 4.23414734  |

| Al[H <sub>B</sub> P <sub>N</sub> ] |   |           |              | Al[H <sub>N</sub> P <sub>B</sub> ] |   |           |              |
|------------------------------------|---|-----------|--------------|------------------------------------|---|-----------|--------------|
| C                                  | 0 | 1.265996  | -8.61687403  | C                                  | 0 | 1.265996  | -8.57463809  |
| C                                  | 0 | 1.589678  | -7.25259803  | C                                  | 0 | 1.589678  | -7.21036209  |
| C                                  | 0 | -1.265996 | -8.61687403  | C                                  | 0 | -1.265996 | -8.57463809  |
| C                                  | 0 | 0.749116  | -6.14907603  | C                                  | 0 | 0.749116  | -6.10684009  |
| C                                  | 0 | -1.589678 | -7.25259803  | C                                  | 0 | -1.589678 | -7.21036209  |
| C                                  | 0 | -0.749116 | -6.14907603  | C                                  | 0 | -0.749116 | -6.10684009  |
| H                                  | 0 | 0         | -10.29741303 | H                                  | 0 | 0         | -10.25517709 |
| H                                  | 0 | 2.109709  | -9.30152303  | H                                  | 0 | 2.109709  | -9.25928709  |
| H                                  | 0 | 2.655422  | -7.02880803  | H                                  | 0 | 2.655422  | -6.98657209  |
| H                                  | 0 | -2.109709 | -9.30152303  | H                                  | 0 | -2.109709 | -9.25928709  |
| H                                  | 0 | -2.655422 | -7.02880803  | H                                  | 0 | -2.655422 | -6.98657209  |
| C                                  | 0 | 1.165553  | -4.78734603  | C                                  | 0 | 1.165553  | -4.74511009  |
| C                                  | 0 | -1.165553 | -4.78734603  | C                                  | 0 | -1.165553 | -4.74511009  |
| C                                  | 0 | 0         | -2.55317303  | C                                  | 0 | 0         | -2.51093709  |
| C                                  | 0 | -1.305082 | -1.93166003  | C                                  | 0 | -1.305082 | -1.88942409  |
| C                                  | 0 | 1.305082  | -1.93166003  | C                                  | 0 | 1.305082  | -1.88942409  |
| C                                  | 0 | -1.580366 | -0.53953003  | C                                  | 0 | -1.580366 | -0.49729409  |
| C                                  | 0 | 1.580366  | -0.53953003  | C                                  | 0 | 1.580366  | -0.49729409  |
| C                                  | 0 | -0.74355  | 0.55397397   | C                                  | 0 | -0.74355  | 0.59620991   |
| H                                  | 0 | -2.642683 | -0.30059003  | H                                  | 0 | -2.642683 | -0.25835409  |
| C                                  | 0 | 0.74355   | 0.55397397   | C                                  | 0 | 0.74355   | 0.59620991   |
| H                                  | 0 | 2.642683  | -0.30059003  | H                                  | 0 | 2.642683  | -0.25835409  |
| C                                  | 0 | -1.163845 | 1.92212597   | C                                  | 0 | -1.163845 | 1.96436191   |
| C                                  | 0 | 1.163845  | 1.92212597   | C                                  | 0 | 1.163845  | 1.96436191   |
| C                                  | 0 | 0         | 2.73835897   | C                                  | 0 | 0         | 2.78059491   |
| C                                  | 0 | -2.429854 | -4.15395903  | C                                  | 0 | -2.429854 | -4.11172309  |
| H                                  | 0 | -3.353322 | -4.72529503  | H                                  | 0 | -3.353322 | -4.68305909  |
| C                                  | 0 | -2.468447 | -2.78278403  | C                                  | 0 | -2.468447 | -2.74054809  |
| H                                  | 0 | -3.434671 | -2.28651403  | H                                  | 0 | -3.434671 | -2.24427809  |
| C                                  | 0 | 2.468447  | -2.78278403  | C                                  | 0 | 2.468447  | -2.74054809  |
| H                                  | 0 | 3.434671  | -2.28651403  | H                                  | 0 | 3.434671  | -2.24427809  |
| C                                  | 0 | 2.429854  | -4.15395903  | C                                  | 0 | 2.429854  | -4.11172309  |
| H                                  | 0 | 3.353322  | -4.72529503  | H                                  | 0 | 3.353322  | -4.68305909  |
| C                                  | 0 | -1.306075 | 4.77939897   | C                                  | 0 | -1.306075 | 4.82163491   |
| C                                  | 0 | -1.585021 | 6.16614497   | C                                  | 0 | -1.585021 | 6.20838091   |
| C                                  | 0 | 1.306075  | 4.77939897   | C                                  | 0 | 1.306075  | 4.82163491   |
| C                                  | 0 | -0.744681 | 7.26431697   | C                                  | 0 | -0.744681 | 7.30655291   |
| C                                  | 0 | 1.585021  | 6.16614497   | C                                  | 0 | 1.585021  | 6.20838091   |
| C                                  | 0 | 0.744681  | 7.26431697   | C                                  | 0 | 0.744681  | 7.30655291   |
| H                                  | 0 | -2.646903 | 6.40993197   | H                                  | 0 | -2.646903 | 6.45216791   |
| H                                  | 0 | 2.646903  | 6.40993197   | H                                  | 0 | 2.646903  | 6.45216791   |
| C                                  | 0 | -1.148431 | 8.61737697   | C                                  | 0 | -1.148431 | 8.65961291   |
| C                                  | 0 | 1.148431  | 8.61737697   | C                                  | 0 | 1.148431  | 8.65961291   |
| C                                  | 0 | 2.426537  | 2.55235597   | C                                  | 0 | 2.426537  | 2.59459191   |



|   |   |           |             |   |   |           |             |
|---|---|-----------|-------------|---|---|-----------|-------------|
| C | 0 | 2.46902   | 3.92373397  | C | 0 | 2.46902   | 3.96596991  |
| H | 0 | 3.349235  | 1.97924197  | H | 0 | 3.349235  | 2.02147791  |
| H | 0 | 3.436075  | 4.41828997  | H | 0 | 3.436075  | 4.46052591  |
| C | 0 | -2.426537 | 2.55235597  | C | 0 | -2.426537 | 2.59459191  |
| C | 0 | -2.46902  | 3.92373397  | C | 0 | -2.46902  | 3.96596991  |
| H | 0 | -3.349235 | 1.97924197  | H | 0 | -3.349235 | 2.02147791  |
| H | 0 | -3.436075 | 4.41828997  | H | 0 | -3.436075 | 4.46052591  |
| H | 0 | 2.176091  | 8.96059397  | H | 0 | 2.176091  | 9.00282991  |
| H | 0 | 0         | 10.50780197 | H | 0 | 0         | 10.55003791 |
| H | 0 | -2.176091 | 8.96059397  | H | 0 | -2.176091 | 9.00282991  |
| N | 0 | 0         | -3.97163903 | B | 0 | 0         | -3.92940309 |
| B | 0 | 0         | -9.20889503 | N | 0 | 0         | -9.16665909 |
| C | 0 | 0         | 9.42344697  | C | 0 | 0         | 9.46568291  |
| C | 0 | 0         | 4.15764997  | C | 0 | 0         | 4.19988591  |

| A1[H <sub>N</sub> P <sub>N</sub> ] |   |           |              | A1[H <sub>B</sub> P <sub>B</sub> ]A2[H <sub>B</sub> P <sub>B</sub> ] |   |           |              |
|------------------------------------|---|-----------|--------------|----------------------------------------------------------------------|---|-----------|--------------|
| C                                  | 0 | 1.265996  | -8.65024939  | C                                                                    | 0 | 1.265996  | -8.64866949  |
| C                                  | 0 | 1.589678  | -7.28597339  | C                                                                    | 0 | 1.589678  | -7.28439349  |
| C                                  | 0 | -1.265996 | -8.65024939  | C                                                                    | 0 | -1.265996 | -8.64866949  |
| C                                  | 0 | 0.749116  | -6.18245139  | C                                                                    | 0 | 0.749116  | -6.18087149  |
| C                                  | 0 | -1.589678 | -7.28597339  | C                                                                    | 0 | -1.589678 | -7.28439349  |
| C                                  | 0 | -0.749116 | -6.18245139  | C                                                                    | 0 | -0.749116 | -6.18087149  |
| H                                  | 0 | 0         | -10.33078839 | H                                                                    | 0 | 0         | -10.32920849 |
| H                                  | 0 | 2.109709  | -9.33489839  | H                                                                    | 0 | 2.109709  | -9.33331849  |
| H                                  | 0 | 2.655422  | -7.06218339  | H                                                                    | 0 | 2.655422  | -7.06060349  |
| H                                  | 0 | -2.109709 | -9.33489839  | H                                                                    | 0 | -2.109709 | -9.33331849  |
| H                                  | 0 | -2.655422 | -7.06218339  | H                                                                    | 0 | -2.655422 | -7.06060349  |
| C                                  | 0 | 1.165553  | -4.82072139  | C                                                                    | 0 | 1.165553  | -4.81914149  |
| C                                  | 0 | -1.165553 | -4.82072139  | C                                                                    | 0 | -1.165553 | -4.81914149  |
| C                                  | 0 | 0         | -2.58654839  | C                                                                    | 0 | -1.305082 | -1.96345549  |
| C                                  | 0 | -1.305082 | -1.96503539  | C                                                                    | 0 | 1.305082  | -1.96345549  |
| C                                  | 0 | 1.305082  | -1.96503539  | C                                                                    | 0 | -1.580366 | -0.57132549  |
| C                                  | 0 | -1.580366 | -0.57290539  | C                                                                    | 0 | 1.580366  | -0.57132549  |
| C                                  | 0 | 1.580366  | -0.57290539  | C                                                                    | 0 | -0.74355  | 0.52217851   |
| C                                  | 0 | -0.74355  | 0.52059861   | H                                                                    | 0 | -2.642683 | -0.33238549  |
| H                                  | 0 | -2.642683 | -0.33396539  | C                                                                    | 0 | 0.74355   | 0.52217851   |
| C                                  | 0 | 0.74355   | 0.52059861   | H                                                                    | 0 | 2.642683  | -0.33238549  |
| H                                  | 0 | 2.642683  | -0.33396539  | C                                                                    | 0 | -1.163845 | 1.89033051   |
| C                                  | 0 | -1.163845 | 1.88875061   | C                                                                    | 0 | 1.163845  | 1.89033051   |
| C                                  | 0 | 1.163845  | 1.88875061   | C                                                                    | 0 | -2.429854 | -4.18575449  |
| C                                  | 0 | 0         | 2.70498361   | H                                                                    | 0 | -3.353322 | -4.75709049  |
| C                                  | 0 | -2.429854 | -4.18733439  | C                                                                    | 0 | -2.468447 | -2.81457949  |
| H                                  | 0 | -3.353322 | -4.75867039  | H                                                                    | 0 | -3.434671 | -2.31830949  |
| C                                  | 0 | -2.468447 | -2.81615939  | C                                                                    | 0 | 2.468447  | -2.81457949  |
| H                                  | 0 | -3.434671 | -2.31988939  | H                                                                    | 0 | 3.434671  | -2.31830949  |
| C                                  | 0 | 2.468447  | -2.81615939  | C                                                                    | 0 | 2.429854  | -4.18575449  |
| H                                  | 0 | 3.434671  | -2.31988939  | H                                                                    | 0 | 3.353322  | -4.75709049  |
| C                                  | 0 | 2.429854  | -4.18733439  | C                                                                    | 0 | 0         | 4.12585451   |
| H                                  | 0 | 3.353322  | -4.75867039  | C                                                                    | 0 | -1.306075 | 4.74760351   |
| C                                  | 0 | -1.306075 | 4.74602361   | C                                                                    | 0 | -1.585021 | 6.13434951   |
| C                                  | 0 | -1.585021 | 6.13276961   | C                                                                    | 0 | 1.306075  | 4.74760351   |
| C                                  | 0 | 1.306075  | 4.74602361   | C                                                                    | 0 | -0.744681 | 7.23252151   |
| C                                  | 0 | -0.744681 | 7.23094161   | C                                                                    | 0 | 1.585021  | 6.13434951   |
| C                                  | 0 | 1.585021  | 6.13276961   | C                                                                    | 0 | 0.744681  | 7.23252151   |
| C                                  | 0 | 0.744681  | 7.23094161   | H                                                                    | 0 | -2.646903 | 6.37813651   |
| H                                  | 0 | -2.646903 | 6.37655661   | H                                                                    | 0 | 2.646903  | 6.37813651   |
| H                                  | 0 | 2.646903  | 6.37655661   | C                                                                    | 0 | -1.148431 | 8.58558151   |
| C                                  | 0 | -1.148431 | 8.58400161   | C                                                                    | 0 | 0         | 9.39165151   |
| C                                  | 0 | 1.148431  | 8.58400161   | C                                                                    | 0 | 1.148431  | 8.58558151   |
| C                                  | 0 | 2.426537  | 2.51898061   | C                                                                    | 0 | 2.426537  | 2.52056051   |
| C                                  | 0 | 2.46902   | 3.89035861   | C                                                                    | 0 | 2.46902   | 3.89193851   |
| H                                  | 0 | 3.349235  | 1.94586661   | H                                                                    | 0 | 3.349235  | 1.94744651   |
| H                                  | 0 | 3.436075  | 4.38491461   | H                                                                    | 0 | 3.436075  | 4.38649451   |
| C                                  | 0 | -2.426537 | 2.51898061   | C                                                                    | 0 | -2.426537 | 2.52056051   |

|   |   |           |             |   |   |           |             |
|---|---|-----------|-------------|---|---|-----------|-------------|
| C | 0 | -2.46902  | 3.89035861  | C | 0 | -2.46902  | 3.89193851  |
| H | 0 | -3.349235 | 1.94586661  | H | 0 | -3.349235 | 1.94744651  |
| H | 0 | -3.436075 | 4.38491461  | H | 0 | -3.436075 | 4.38649451  |
| H | 0 | 2.176091  | 8.92721861  | H | 0 | 2.176091  | 8.92879851  |
| H | 0 | 0         | 10.47442661 | H | 0 | 0         | 10.47600651 |
| H | 0 | -2.176091 | 8.92721861  | H | 0 | -2.176091 | 8.92879851  |
| N | 0 | 0         | -4.00501439 | B | 0 | 0         | -9.24069049 |
| N | 0 | 0         | -9.24227039 | B | 0 | 0         | -4.00343449 |
| C | 0 | 0         | 9.39007161  | B | 0 | 0         | -2.58496849 |
| C | 0 | 0         | 4.12427461  | B | 0 | 0         | 2.70656351  |

|   | A1[H <sub>B</sub> P <sub>N</sub> ]A2[H <sub>B</sub> P <sub>N</sub> ] |           |              |   | A1[H <sub>N</sub> P <sub>B</sub> ]A2[H <sub>N</sub> P <sub>B</sub> ] |           |              |
|---|----------------------------------------------------------------------|-----------|--------------|---|----------------------------------------------------------------------|-----------|--------------|
| C | 0                                                                    | 1.265996  | -8.63821085  | C | 0                                                                    | 1.265996  | -8.55330127  |
| C | 0                                                                    | 1.589678  | -7.27393485  | C | 0                                                                    | 1.589678  | -7.18902527  |
| C | 0                                                                    | -1.265996 | -8.63821085  | C | 0                                                                    | -1.265996 | -8.55330127  |
| C | 0                                                                    | 0.749116  | -6.17041285  | C | 0                                                                    | 0.749116  | -6.08550327  |
| C | 0                                                                    | -1.589678 | -7.27393485  | C | 0                                                                    | -1.589678 | -7.18902527  |
| C | 0                                                                    | -0.749116 | -6.17041285  | C | 0                                                                    | -0.749116 | -6.08550327  |
| H | 0                                                                    | 0         | -10.31874985 | H | 0                                                                    | 0         | -10.23384027 |
| H | 0                                                                    | 2.109709  | -9.32285985  | H | 0                                                                    | 2.109709  | -9.23795027  |
| H | 0                                                                    | 2.655422  | -7.05014485  | H | 0                                                                    | 2.655422  | -6.96523527  |
| H | 0                                                                    | -2.109709 | -9.32285985  | H | 0                                                                    | -2.109709 | -9.23795027  |
| H | 0                                                                    | -2.655422 | -7.05014485  | H | 0                                                                    | -2.655422 | -6.96523527  |
| C | 0                                                                    | 1.165553  | -4.80868285  | C | 0                                                                    | 1.165553  | -4.72377327  |
| C | 0                                                                    | -1.165553 | -4.80868285  | C | 0                                                                    | -1.165553 | -4.72377327  |
| C | 0                                                                    | -1.305082 | -1.95299685  | C | 0                                                                    | -1.305082 | -1.86808727  |
| C | 0                                                                    | 1.305082  | -1.95299685  | C | 0                                                                    | 1.305082  | -1.86808727  |
| C | 0                                                                    | -1.580366 | -0.56086685  | C | 0                                                                    | -1.580366 | -0.47595727  |
| C | 0                                                                    | 1.580366  | -0.56086685  | C | 0                                                                    | 1.580366  | -0.47595727  |
| C | 0                                                                    | -0.74355  | 0.53263715   | C | 0                                                                    | -0.74355  | 0.61754673   |
| H | 0                                                                    | -2.642683 | -0.32192685  | H | 0                                                                    | -2.642683 | -0.23701727  |
| C | 0                                                                    | 0.74355   | 0.53263715   | C | 0                                                                    | 0.74355   | 0.61754673   |
| H | 0                                                                    | 2.642683  | -0.32192685  | H | 0                                                                    | 2.642683  | -0.23701727  |
| C | 0                                                                    | -1.163845 | 1.90078915   | C | 0                                                                    | -1.163845 | 1.98569873   |
| C | 0                                                                    | 1.163845  | 1.90078915   | C | 0                                                                    | 1.163845  | 1.98569873   |
| C | 0                                                                    | -2.429854 | -4.17529585  | C | 0                                                                    | -2.429854 | -4.09038627  |
| H | 0                                                                    | -3.353322 | -4.74663185  | H | 0                                                                    | -3.353322 | -4.66172227  |
| C | 0                                                                    | -2.468447 | -2.80412085  | C | 0                                                                    | -2.468447 | -2.71921127  |
| H | 0                                                                    | -3.434671 | -2.30785085  | H | 0                                                                    | -3.434671 | -2.22294127  |
| C | 0                                                                    | 2.468447  | -2.80412085  | C | 0                                                                    | 2.468447  | -2.71921127  |
| H | 0                                                                    | 3.434671  | -2.30785085  | H | 0                                                                    | 3.434671  | -2.22294127  |
| C | 0                                                                    | 2.429854  | -4.17529585  | C | 0                                                                    | 2.429854  | -4.09038627  |
| H | 0                                                                    | 3.353322  | -4.74663185  | H | 0                                                                    | 3.353322  | -4.66172227  |
| C | 0                                                                    | 0         | 4.13631315   | C | 0                                                                    | 0         | 4.22122273   |
| C | 0                                                                    | -1.306075 | 4.75806215   | C | 0                                                                    | -1.306075 | 4.84297173   |
| C | 0                                                                    | -1.585021 | 6.14480815   | C | 0                                                                    | -1.585021 | 6.22971773   |
| C | 0                                                                    | 1.306075  | 4.75806215   | C | 0                                                                    | 1.306075  | 4.84297173   |
| C | 0                                                                    | -0.744681 | 7.24298015   | C | 0                                                                    | -0.744681 | 7.32788973   |
| C | 0                                                                    | 1.585021  | 6.14480815   | C | 0                                                                    | 1.585021  | 6.22971773   |
| C | 0                                                                    | 0.744681  | 7.24298015   | C | 0                                                                    | 0.744681  | 7.32788973   |
| H | 0                                                                    | -2.646903 | 6.38859515   | H | 0                                                                    | -2.646903 | 6.47350473   |
| H | 0                                                                    | 2.646903  | 6.38859515   | H | 0                                                                    | 2.646903  | 6.47350473   |
| C | 0                                                                    | -1.148431 | 8.59604015   | C | 0                                                                    | -1.148431 | 8.68094973   |
| C | 0                                                                    | 0         | 9.40211015   | C | 0                                                                    | 0         | 9.48701973   |
| C | 0                                                                    | 1.148431  | 8.59604015   | C | 0                                                                    | 1.148431  | 8.68094973   |
| C | 0                                                                    | 2.426537  | 2.53101915   | C | 0                                                                    | 2.426537  | 2.61592873   |
| C | 0                                                                    | 2.46902   | 3.90239715   | C | 0                                                                    | 2.46902   | 3.98730673   |
| H | 0                                                                    | 3.349235  | 1.95790515   | H | 0                                                                    | 3.349235  | 2.04281473   |
| H | 0                                                                    | 3.436075  | 4.39695315   | H | 0                                                                    | 3.436075  | 4.48186273   |
| C | 0                                                                    | -2.426537 | 2.53101915   | C | 0                                                                    | -2.426537 | 2.61592873   |
| C | 0                                                                    | -2.46902  | 3.90239715   | C | 0                                                                    | -2.46902  | 3.98730673   |
| H | 0                                                                    | -3.349235 | 1.95790515   | H | 0                                                                    | -3.349235 | 2.04281473   |
| H | 0                                                                    | -3.436075 | 4.39695315   | H | 0                                                                    | -3.436075 | 4.48186273   |
| H | 0                                                                    | 2.176091  | 8.93925715   | H | 0                                                                    | 2.176091  | 9.02416673   |

|   |   |           |             |   |   |           |             |
|---|---|-----------|-------------|---|---|-----------|-------------|
| H | 0 | 0         | 10.48646515 | H | 0 | 0         | 10.57137473 |
| H | 0 | -2.176091 | 8.93925715  | H | 0 | -2.176091 | 9.02416673  |
| B | 0 | 0         | -9.23023185 | N | 0 | 0         | -9.14532227 |
| B | 0 | 0         | -2.57450985 | N | 0 | 0         | -2.48960027 |
| N | 0 | 0         | -3.99297585 | B | 0 | 0         | -3.90806627 |
| N | 0 | 0         | 2.71702215  | B | 0 | 0         | 2.80193173  |

| A1[H <sub>N</sub> P <sub>N</sub> ] A2[H <sub>N</sub> P <sub>N</sub> ] |   |           |              | A2[H <sub>B</sub> P <sub>B</sub> ] A3[H <sub>B</sub> P <sub>B</sub> ] |   |           |              |
|-----------------------------------------------------------------------|---|-----------|--------------|-----------------------------------------------------------------------|---|-----------|--------------|
| C                                                                     | 0 | 1.265996  | -8.54452242  | C                                                                     | 0 | 1.265996  | -8.53899067  |
| C                                                                     | 0 | 1.589678  | -7.18024642  | C                                                                     | 0 | 1.589678  | -7.17471467  |
| C                                                                     | 0 | -1.265996 | -8.54452242  | C                                                                     | 0 | -1.265996 | -8.53899067  |
| C                                                                     | 0 | 0.749116  | -6.07672442  | C                                                                     | 0 | 0.749116  | -6.07119267  |
| C                                                                     | 0 | -1.589678 | -7.18024642  | C                                                                     | 0 | -1.589678 | -7.17471467  |
| C                                                                     | 0 | -0.749116 | -6.07672442  | C                                                                     | 0 | -0.749116 | -6.07119267  |
| H                                                                     | 0 | 0         | -10.22506142 | H                                                                     | 0 | 0         | -10.21952967 |
| H                                                                     | 0 | 2.109709  | -9.22917142  | H                                                                     | 0 | 2.109709  | -9.22363967  |
| H                                                                     | 0 | 2.655422  | -6.95645642  | H                                                                     | 0 | 2.655422  | -6.95092467  |
| H                                                                     | 0 | -2.109709 | -9.22917142  | H                                                                     | 0 | -2.109709 | -9.22363967  |
| H                                                                     | 0 | -2.655422 | -6.95645642  | H                                                                     | 0 | -2.655422 | -6.95092467  |
| C                                                                     | 0 | 1.165553  | -4.71499442  | C                                                                     | 0 | 1.165553  | -4.70946267  |
| C                                                                     | 0 | -1.165553 | -4.71499442  | C                                                                     | 0 | -1.165553 | -4.70946267  |
| C                                                                     | 0 | -1.305082 | -1.85930842  | C                                                                     | 0 | -1.305082 | -1.85377667  |
| C                                                                     | 0 | 1.305082  | -1.85930842  | C                                                                     | 0 | 1.305082  | -1.85377667  |
| C                                                                     | 0 | -1.580366 | -0.46717842  | C                                                                     | 0 | -1.580366 | -0.46164667  |
| C                                                                     | 0 | 1.580366  | -0.46717842  | C                                                                     | 0 | 1.580366  | -0.46164667  |
| C                                                                     | 0 | -0.74355  | 0.62632558   | C                                                                     | 0 | -0.74355  | 0.63185733   |
| H                                                                     | 0 | -2.642683 | -0.22823842  | H                                                                     | 0 | -2.642683 | -0.22270667  |
| C                                                                     | 0 | 0.74355   | 0.62632558   | C                                                                     | 0 | 0.74355   | 0.63185733   |
| H                                                                     | 0 | 2.642683  | -0.22823842  | H                                                                     | 0 | 2.642683  | -0.22270667  |
| C                                                                     | 0 | -1.163845 | 1.99447758   | C                                                                     | 0 | -1.163845 | 2.00000933   |
| C                                                                     | 0 | 1.163845  | 1.99447758   | C                                                                     | 0 | 1.163845  | 2.00000933   |
| C                                                                     | 0 | -2.429854 | -4.08160742  | C                                                                     | 0 | -2.429854 | -4.07607567  |
| H                                                                     | 0 | -3.353322 | -4.65294342  | H                                                                     | 0 | -3.353322 | -4.64741167  |
| C                                                                     | 0 | -2.468447 | -2.71043242  | C                                                                     | 0 | -2.468447 | -2.70490067  |
| H                                                                     | 0 | -3.434671 | -2.21416242  | C                                                                     | 0 | -3.434671 | -2.20863067  |
| C                                                                     | 0 | 2.468447  | -2.71043242  | H                                                                     | 0 | 2.468447  | -2.70490067  |
| H                                                                     | 0 | 3.434671  | -2.21416242  | H                                                                     | 0 | 3.434671  | -2.20863067  |
| C                                                                     | 0 | 2.429854  | -4.08160742  | C                                                                     | 0 | 2.429854  | -4.07607567  |
| H                                                                     | 0 | 3.353322  | -4.65294342  | H                                                                     | 0 | 3.353322  | -4.64741167  |
| C                                                                     | 0 | 0         | 4.23000158   | C                                                                     | 0 | -1.306075 | 4.85728233   |
| C                                                                     | 0 | -1.306075 | 4.85175058   | C                                                                     | 0 | -1.585021 | 6.24402833   |
| C                                                                     | 0 | -1.585021 | 6.23849658   | C                                                                     | 0 | 1.306075  | 4.85728233   |
| C                                                                     | 0 | 1.306075  | 4.85175058   | C                                                                     | 0 | -0.744681 | 7.34220033   |
| C                                                                     | 0 | -0.744681 | 7.33666858   | C                                                                     | 0 | 1.585021  | 6.24402833   |
| C                                                                     | 0 | 1.585021  | 6.23849658   | C                                                                     | 0 | 0.744681  | 7.34220033   |
| C                                                                     | 0 | 0.744681  | 7.33666858   | H                                                                     | 0 | -2.646903 | 6.48781533   |
| H                                                                     | 0 | -2.646903 | 6.48228358   | H                                                                     | 0 | 2.646903  | 6.48781533   |
| H                                                                     | 0 | 2.646903  | 6.48228358   | C                                                                     | 0 | -1.148431 | 8.69526033   |
| C                                                                     | 0 | -1.148431 | 8.68972858   | C                                                                     | 0 | 1.148431  | 8.69526033   |
| C                                                                     | 0 | 0         | 9.49579858   | C                                                                     | 0 | 2.426537  | 2.63023933   |
| C                                                                     | 0 | 1.148431  | 8.68972858   | C                                                                     | 0 | 2.46902   | 4.00161733   |
| C                                                                     | 0 | 2.426537  | 2.62470758   | H                                                                     | 0 | 3.349235  | 2.05712533   |
| C                                                                     | 0 | 2.46902   | 3.99608558   | H                                                                     | 0 | 3.436075  | 4.49617333   |
| H                                                                     | 0 | 3.349235  | 2.05159358   | C                                                                     | 0 | -2.426537 | 2.63023933   |
| H                                                                     | 0 | 3.436075  | 4.49064158   | C                                                                     | 0 | -2.46902  | 4.00161733   |
| C                                                                     | 0 | -2.426537 | 2.62470758   | H                                                                     | 0 | -3.349235 | 2.05712533   |
| C                                                                     | 0 | -2.46902  | 3.99608558   | H                                                                     | 0 | -3.436075 | 4.49617333   |
| H                                                                     | 0 | -3.349235 | 2.05159358   | H                                                                     | 0 | 2.176091  | 9.03847733   |
| H                                                                     | 0 | -3.436075 | 4.49064158   | H                                                                     | 0 | 0         | 10.58568533  |
| H                                                                     | 0 | 2.176091  | 9.03294558   | H                                                                     | 0 | -2.176091 | 9.03847733   |
| H                                                                     | 0 | 0         | 10.58015358  | B                                                                     | 0 | 0         | -2.47528967  |
| H                                                                     | 0 | -2.176091 | 9.03294558   | B                                                                     | 0 | 0         | 2.81624233   |

|   |   |   |             |   |   |   |             |
|---|---|---|-------------|---|---|---|-------------|
| N | 0 | 0 | -9.13654342 | C | 0 | 0 | -3.89375567 |
| N | 0 | 0 | -3.89928742 | C | 0 | 0 | -9.13101167 |
| N | 0 | 0 | -2.48082142 | B | 0 | 0 | 9.50133033  |
| N | 0 | 0 | 2.81071058  | B | 0 | 0 | 4.23553333  |

| A2[H <sub>B</sub> P <sub>N</sub> ] A3[H <sub>B</sub> P <sub>N</sub> ] |   |           |              | A2[H <sub>N</sub> P <sub>B</sub> ] A3[H <sub>N</sub> P <sub>B</sub> ] |   |           |              |
|-----------------------------------------------------------------------|---|-----------|--------------|-----------------------------------------------------------------------|---|-----------|--------------|
| C                                                                     | 0 | 1.265996  | -8.63832594  | C                                                                     | 0 | 1.265996  | -8.55340504  |
| C                                                                     | 0 | 1.589678  | -7.27404994  | C                                                                     | 0 | 1.589678  | -7.18912904  |
| C                                                                     | 0 | -1.265996 | -8.63832594  | C                                                                     | 0 | -1.265996 | -8.55340504  |
| C                                                                     | 0 | 0.749116  | -6.17052794  | C                                                                     | 0 | 0.749116  | -6.08560704  |
| C                                                                     | 0 | -1.589678 | -7.27404994  | C                                                                     | 0 | -1.589678 | -7.18912904  |
| C                                                                     | 0 | -0.749116 | -6.17052794  | C                                                                     | 0 | -0.749116 | -6.08560704  |
| H                                                                     | 0 | 0         | -10.31886494 | H                                                                     | 0 | 0         | -10.23394404 |
| H                                                                     | 0 | 2.109709  | -9.32297494  | H                                                                     | 0 | 2.109709  | -9.23805404  |
| H                                                                     | 0 | 2.655422  | -7.05025994  | H                                                                     | 0 | 2.655422  | -6.96533904  |
| H                                                                     | 0 | -2.109709 | -9.32297494  | H                                                                     | 0 | -2.109709 | -9.23805404  |
| H                                                                     | 0 | -2.655422 | -7.05025994  | H                                                                     | 0 | -2.655422 | -6.96533904  |
| C                                                                     | 0 | 1.165553  | -4.80879794  | C                                                                     | 0 | 1.165553  | -4.72387704  |
| C                                                                     | 0 | -1.165553 | -4.80879794  | C                                                                     | 0 | -1.165553 | -4.72387704  |
| C                                                                     | 0 | -1.305082 | -1.95311194  | C                                                                     | 0 | -1.305082 | -1.86819104  |
| C                                                                     | 0 | 1.305082  | -1.95311194  | C                                                                     | 0 | 1.305082  | -1.86819104  |
| C                                                                     | 0 | -1.580366 | -0.56098194  | C                                                                     | 0 | -1.580366 | -0.47606104  |
| C                                                                     | 0 | 1.580366  | -0.56098194  | C                                                                     | 0 | 1.580366  | -0.47606104  |
| C                                                                     | 0 | -0.74355  | 0.53252206   | C                                                                     | 0 | -0.74355  | 0.61744296   |
| H                                                                     | 0 | -2.642683 | -0.32204194  | H                                                                     | 0 | -2.642683 | -0.23712104  |
| C                                                                     | 0 | 0.74355   | 0.53252206   | C                                                                     | 0 | 0.74355   | 0.61744296   |
| H                                                                     | 0 | 2.642683  | -0.32204194  | H                                                                     | 0 | 2.642683  | -0.23712104  |
| C                                                                     | 0 | -1.163845 | 1.90067406   | C                                                                     | 0 | -1.163845 | 1.98559496   |
| C                                                                     | 0 | 1.163845  | 1.90067406   | C                                                                     | 0 | 1.163845  | 1.98559496   |
| C                                                                     | 0 | -2.429854 | -4.17541094  | C                                                                     | 0 | -2.429854 | -4.09049004  |
| H                                                                     | 0 | -3.353322 | -4.74674694  | H                                                                     | 0 | -3.353322 | -4.66182604  |
| C                                                                     | 0 | -2.468447 | -2.80423594  | C                                                                     | 0 | -2.468447 | -2.71931504  |
| H                                                                     | 0 | -3.434671 | -2.30796594  | H                                                                     | 0 | -3.434671 | -2.22304504  |
| C                                                                     | 0 | 2.468447  | -2.80423594  | C                                                                     | 0 | 2.468447  | -2.71931504  |
| H                                                                     | 0 | 3.434671  | -2.30796594  | H                                                                     | 0 | 3.434671  | -2.22304504  |
| C                                                                     | 0 | 2.429854  | -4.17541094  | C                                                                     | 0 | 2.429854  | -4.09049004  |
| H                                                                     | 0 | 3.353322  | -4.74674694  | H                                                                     | 0 | 3.353322  | -4.66182604  |
| C                                                                     | 0 | -1.306075 | 4.75794706   | C                                                                     | 0 | -1.306075 | 4.84286796   |
| C                                                                     | 0 | -1.585021 | 6.14469306   | C                                                                     | 0 | -1.585021 | 6.22961396   |
| C                                                                     | 0 | 1.306075  | 4.75794706   | C                                                                     | 0 | 1.306075  | 4.84286796   |
| C                                                                     | 0 | -0.744681 | 7.24286506   | C                                                                     | 0 | -0.744681 | 7.32778596   |
| C                                                                     | 0 | 1.585021  | 6.14469306   | C                                                                     | 0 | 1.585021  | 6.22961396   |
| C                                                                     | 0 | 0.744681  | 7.24286506   | C                                                                     | 0 | 0.744681  | 7.32778596   |
| H                                                                     | 0 | -2.646903 | 6.38848006   | H                                                                     | 0 | -2.646903 | 6.47340096   |
| H                                                                     | 0 | 2.646903  | 6.38848006   | H                                                                     | 0 | 2.646903  | 6.47340096   |
| C                                                                     | 0 | -1.148431 | 8.59592506   | C                                                                     | 0 | -1.148431 | 8.68084596   |
| C                                                                     | 0 | 1.148431  | 8.59592506   | C                                                                     | 0 | 1.148431  | 8.68084596   |
| C                                                                     | 0 | 2.426537  | 2.53090406   | C                                                                     | 0 | 2.426537  | 2.61582496   |
| C                                                                     | 0 | 2.46902   | 3.90228206   | C                                                                     | 0 | 2.46902   | 3.98720296   |
| H                                                                     | 0 | 3.349235  | 1.95779006   | H                                                                     | 0 | 3.349235  | 2.04271096   |
| H                                                                     | 0 | 3.436075  | 4.39683806   | H                                                                     | 0 | 3.436075  | 4.48175896   |
| C                                                                     | 0 | -2.426537 | 2.53090406   | C                                                                     | 0 | -2.426537 | 2.61582496   |
| C                                                                     | 0 | -2.46902  | 3.90228206   | C                                                                     | 0 | -2.46902  | 3.98720296   |
| H                                                                     | 0 | -3.349235 | 1.95779006   | H                                                                     | 0 | -3.349235 | 2.04271096   |
| H                                                                     | 0 | -3.436075 | 4.39683806   | H                                                                     | 0 | -3.436075 | 4.48175896   |
| H                                                                     | 0 | 2.176091  | 8.93914206   | H                                                                     | 0 | 2.176091  | 9.02406296   |
| H                                                                     | 0 | 0         | 10.48635006  | H                                                                     | 0 | 0         | 10.57127096  |
| H                                                                     | 0 | -2.176091 | 8.93914206   | H                                                                     | 0 | -2.176091 | 9.02406296   |
| B                                                                     | 0 | 0         | -2.57462494  | N                                                                     | 0 | 0         | -9.14542604  |
| N                                                                     | 0 | 0         | 2.71690706   | B                                                                     | 0 | 0         | -3.90817004  |
| C                                                                     | 0 | 0         | -3.99309094  | C                                                                     | 0 | 0         | -2.48970404  |
| C                                                                     | 0 | 0         | -9.23034694  | C                                                                     | 0 | 0         | 2.80182796   |
| B                                                                     | 0 | 0         | 4.13619806   | N                                                                     | 0 | 0         | 4.22111896   |

|   |                                                                     |           |              |   |                                                                     |           |              |
|---|---------------------------------------------------------------------|-----------|--------------|---|---------------------------------------------------------------------|-----------|--------------|
| N | 0                                                                   | 0         | 9.40199506   | B | 0                                                                   | 0         | 9.48691596   |
|   | <b>A2[H<sub>N</sub>P<sub>N</sub>]A3[H<sub>N</sub>P<sub>N</sub>]</b> |           |              |   | <b>A1[H<sub>B</sub>P<sub>B</sub>]A3[H<sub>B</sub>P<sub>B</sub>]</b> |           |              |
| C | 0                                                                   | 1.260969  | -8.56685391  | C | 0                                                                   | 1.265996  | -8.59376821  |
| C | 0                                                                   | 1.591273  | -7.25766291  | C | 0                                                                   | 1.589678  | -7.22949221  |
| C | 0                                                                   | -1.260969 | -8.56685391  | C | 0                                                                   | -1.265996 | -8.59376821  |
| C | 0                                                                   | 0.708707  | -6.10458891  | C | 0                                                                   | 0.749116  | -6.12597021  |
| C | 0                                                                   | -1.591273 | -7.25766291  | C | 0                                                                   | -1.589678 | -7.22949221  |
| C | 0                                                                   | -0.708707 | -6.10458891  | C | 0                                                                   | -0.749116 | -6.12597021  |
| H | 0                                                                   | 0         | -10.16740391 | H | 0                                                                   | 0         | -10.27430721 |
| H | 0                                                                   | 2.056954  | -9.30507391  | H | 0                                                                   | 2.109709  | -9.27841721  |
| H | 0                                                                   | 2.65772   | -7.05300391  | H | 0                                                                   | 2.655422  | -7.00570221  |
| H | 0                                                                   | -2.056954 | -9.30507391  | H | 0                                                                   | -2.109709 | -9.27841721  |
| H | 0                                                                   | -2.65772  | -7.05300391  | H | 0                                                                   | -2.655422 | -7.00570221  |
| C | 0                                                                   | 1.151847  | -4.75342491  | C | 0                                                                   | 1.165553  | -4.76424021  |
| C | 0                                                                   | -1.151847 | -4.75342491  | C | 0                                                                   | -1.165553 | -4.76424021  |
| C | 0                                                                   | -1.282645 | -1.89681891  | C | 0                                                                   | -1.305082 | -1.90855421  |
| C | 0                                                                   | 1.282645  | -1.89681891  | C | 0                                                                   | 1.305082  | -1.90855421  |
| C | 0                                                                   | -1.546067 | -0.52901191  | C | 0                                                                   | -1.580366 | -0.51642421  |
| C | 0                                                                   | 1.546067  | -0.52901191  | C | 0                                                                   | 1.580366  | -0.51642421  |
| C | 0                                                                   | -0.717908 | 0.60407909   | C | 0                                                                   | -0.74355  | 0.57707979   |
| H | 0                                                                   | -2.61049  | -0.31811491  | H | 0                                                                   | -2.642683 | -0.27748421  |
| C | 0                                                                   | 0.717908  | 0.60407909   | C | 0                                                                   | 0.74355   | 0.57707979   |
| H | 0                                                                   | 2.61049   | -0.31811491  | H | 0                                                                   | 2.642683  | -0.27748421  |
| C | 0                                                                   | -1.136157 | 1.94321009   | C | 0                                                                   | -1.163845 | 1.94523179   |
| C | 0                                                                   | 1.136157  | 1.94321009   | C | 0                                                                   | 1.163845  | 1.94523179   |
| C | 0                                                                   | -2.409477 | -4.12108891  | C | 0                                                                   | -2.429854 | -4.13085321  |
| H | 0                                                                   | -3.336578 | -4.68620391  | H | 0                                                                   | -3.353322 | -4.70218921  |
| C | 0                                                                   | -2.438447 | -2.75271691  | C | 0                                                                   | -2.468447 | -2.75967821  |
| H | 0                                                                   | -3.392791 | -2.23926891  | H | 0                                                                   | -3.434671 | -2.26340821  |
| C | 0                                                                   | 2.438447  | -2.75271691  | C | 0                                                                   | 2.468447  | -2.75967821  |
| H | 0                                                                   | 3.392791  | -2.23926891  | H | 0                                                                   | 3.434671  | -2.26340821  |
| C | 0                                                                   | 2.409477  | -4.12108891  | C | 0                                                                   | 2.429854  | -4.13085321  |
| H | 0                                                                   | 3.336578  | -4.68620391  | H | 0                                                                   | 3.353322  | -4.70218921  |
| C | 0                                                                   | -1.314593 | 4.79386109   | C | 0                                                                   | -1.306075 | 4.80250479   |
| C | 0                                                                   | -1.587139 | 6.15013409   | C | 0                                                                   | -1.585021 | 6.18925079   |
| C | 0                                                                   | 1.314593  | 4.79386109   | C | 0                                                                   | 1.306075  | 4.80250479   |
| C | 0                                                                   | -0.722008 | 7.28434809   | C | 0                                                                   | -0.744681 | 7.28742279   |
| C | 0                                                                   | 1.587139  | 6.15013409   | C | 0                                                                   | 1.585021  | 6.18925079   |
| C | 0                                                                   | 0.722008  | 7.28434809   | C | 0                                                                   | 0.744681  | 7.28742279   |
| H | 0                                                                   | -2.646871 | 6.39562709   | H | 0                                                                   | -2.646903 | 6.43303779   |
| H | 0                                                                   | 2.646871  | 6.39562709   | H | 0                                                                   | 2.646903  | 6.43303779   |
| C | 0                                                                   | -1.124814 | 8.61291709   | C | 0                                                                   | -1.148431 | 8.64048279   |
| C | 0                                                                   | 1.124814  | 8.61291709   | C | 0                                                                   | 1.148431  | 8.64048279   |
| C | 0                                                                   | 2.401894  | 2.56854609   | C | 0                                                                   | 2.426537  | 2.57546179   |
| C | 0                                                                   | 2.477813  | 3.92275609   | C | 0                                                                   | 2.46902   | 3.94683979   |
| H | 0                                                                   | 3.296785  | 1.95622609   | H | 0                                                                   | 3.349235  | 2.00234779   |
| H | 0                                                                   | 3.449572  | 4.40578909   | H | 0                                                                   | 3.436075  | 4.44139579   |
| C | 0                                                                   | -2.401894 | 2.56854609   | C | 0                                                                   | -2.426537 | 2.57546179   |
| C | 0                                                                   | -2.477813 | 3.92275609   | C | 0                                                                   | -2.46902  | 3.94683979   |
| H | 0                                                                   | -3.296785 | 1.95622609   | H | 0                                                                   | -3.349235 | 2.00234779   |
| H | 0                                                                   | -3.449572 | 4.40578909   | H | 0                                                                   | -3.436075 | 4.44139579   |
| H | 0                                                                   | 2.115366  | 9.04260009   | H | 0                                                                   | 2.176091  | 8.98369979   |
| H | 0                                                                   | 0         | 10.40873009  | H | 0                                                                   | 0         | 10.53090779  |
| H | 0                                                                   | -2.115366 | 9.04260009   | H | 0                                                                   | -2.176091 | 8.98369979   |
| N | 0                                                                   | 0         | -9.16141091  | B | 0                                                                   | 0         | -9.18578921  |
| N | 0                                                                   | 0         | 9.40198809   | B | 0                                                                   | 0         | -3.94853321  |
| N | 0                                                                   | 0         | -3.92222691  | C | 0                                                                   | 0         | -2.53006721  |
| N | 0                                                                   | 0         | 4.14034409   | C | 0                                                                   | 0         | 2.76146479   |
| C | 0                                                                   | 0         | -2.54326091  | B | 0                                                                   | 0         | 4.18075579   |
| C | 0                                                                   | 0         | 2.77300209   | B | 0                                                                   | 0         | 9.44655279   |

**A1[H<sub>B</sub>P<sub>N</sub>]A3[H<sub>B</sub>P<sub>N</sub>]**

**A1[H<sub>N</sub>P<sub>B</sub>]A3[H<sub>N</sub>P<sub>B</sub>]**

|   |   |           |              |   |   |           |              |
|---|---|-----------|--------------|---|---|-----------|--------------|
| C | 0 | 1.265996  | -8.63810708  | C | 0 | 1.265996  | -8.55340504  |
| C | 0 | 1.589678  | -7.27383108  | C | 0 | 1.589678  | -7.18912904  |
| C | 0 | -1.265996 | -8.63810708  | C | 0 | -1.265996 | -8.55340504  |
| C | 0 | 0.749116  | -6.17030908  | C | 0 | 0.749116  | -6.08560704  |
| C | 0 | -1.589678 | -7.27383108  | C | 0 | -1.589678 | -7.18912904  |
| C | 0 | -0.749116 | -6.17030908  | C | 0 | -0.749116 | -6.08560704  |
| H | 0 | 0         | -10.31864608 | H | 0 | 0         | -10.23394404 |
| H | 0 | 2.109709  | -9.32275608  | H | 0 | 2.109709  | -9.23805404  |
| H | 0 | 2.655422  | -7.05004108  | H | 0 | 2.655422  | -6.96533904  |
| H | 0 | -2.109709 | -9.32275608  | H | 0 | -2.109709 | -9.23805404  |
| H | 0 | -2.655422 | -7.05004108  | H | 0 | -2.655422 | -6.96533904  |
| C | 0 | 1.165553  | -4.80857908  | C | 0 | 1.165553  | -4.72387704  |
| C | 0 | -1.165553 | -4.80857908  | C | 0 | -1.165553 | -4.72387704  |
| C | 0 | -1.305082 | -1.95289308  | C | 0 | -1.305082 | -1.86819104  |
| C | 0 | 1.305082  | -1.95289308  | C | 0 | 1.305082  | -1.86819104  |
| C | 0 | -1.580366 | -0.56076308  | C | 0 | -1.580366 | -0.47606104  |
| C | 0 | 1.580366  | -0.56076308  | C | 0 | 1.580366  | -0.47606104  |
| C | 0 | -0.74355  | 0.53274092   | C | 0 | -0.74355  | 0.61744296   |
| H | 0 | -2.642683 | -0.32182308  | H | 0 | -2.642683 | -0.23712104  |
| C | 0 | 0.74355   | 0.53274092   | C | 0 | 0.74355   | 0.61744296   |
| H | 0 | 2.642683  | -0.32182308  | H | 0 | 2.642683  | -0.23712104  |
| C | 0 | -1.163845 | 1.90089292   | C | 0 | -1.163845 | 1.98559496   |
| C | 0 | 1.163845  | 1.90089292   | C | 0 | 1.163845  | 1.98559496   |
| C | 0 | -2.429854 | -4.17519208  | C | 0 | -2.429854 | -4.09049004  |
| H | 0 | -3.353322 | -4.74652808  | H | 0 | -3.353322 | -4.66182604  |
| C | 0 | -2.468447 | -2.80401708  | C | 0 | -2.468447 | -2.71931504  |
| H | 0 | -3.434671 | -2.30774708  | H | 0 | -3.434671 | -2.22304504  |
| C | 0 | 2.468447  | -2.80401708  | C | 0 | 2.468447  | -2.71931504  |
| H | 0 | 3.434671  | -2.30774708  | H | 0 | 3.434671  | -2.22304504  |
| C | 0 | 2.429854  | -4.17519208  | C | 0 | 2.429854  | -4.09049004  |
| H | 0 | 3.353322  | -4.74652808  | H | 0 | 3.353322  | -4.66182604  |
| C | 0 | -1.306075 | 4.75816592   | C | 0 | -1.306075 | 4.84286796   |
| C | 0 | -1.585021 | 6.14491192   | C | 0 | -1.585021 | 6.22961396   |
| C | 0 | 1.306075  | 4.75816592   | C | 0 | 1.306075  | 4.84286796   |
| C | 0 | -0.744681 | 7.24308392   | C | 0 | -0.744681 | 7.32778596   |
| C | 0 | 1.585021  | 6.14491192   | C | 0 | 1.585021  | 6.22961396   |
| C | 0 | 0.744681  | 7.24308392   | C | 0 | 0.744681  | 7.32778596   |
| H | 0 | -2.646903 | 6.38869892   | H | 0 | -2.646903 | 6.47340096   |
| H | 0 | 2.646903  | 6.38869892   | H | 0 | 2.646903  | 6.47340096   |
| C | 0 | -1.148431 | 8.59614392   | C | 0 | -1.148431 | 8.68084596   |
| C | 0 | 1.148431  | 8.59614392   | C | 0 | 1.148431  | 8.68084596   |
| C | 0 | 2.426537  | 2.53112292   | C | 0 | 2.426537  | 2.61582496   |
| C | 0 | 2.46902   | 3.90250092   | C | 0 | 2.46902   | 3.98720296   |
| H | 0 | 3.349235  | 1.95800892   | H | 0 | 3.349235  | 2.04271096   |
| H | 0 | 3.436075  | 4.39705692   | H | 0 | 3.436075  | 4.48175896   |
| C | 0 | -2.426537 | 2.53112292   | C | 0 | -2.426537 | 2.61582496   |
| C | 0 | -2.46902  | 3.90250092   | C | 0 | -2.46902  | 3.98720296   |
| H | 0 | -3.349235 | 1.95800892   | H | 0 | -3.349235 | 2.04271096   |
| H | 0 | -3.436075 | 4.39705692   | H | 0 | -3.436075 | 4.48175896   |
| H | 0 | 2.176091  | 8.93936092   | H | 0 | 2.176091  | 9.02406296   |
| H | 0 | 0         | 10.48656892  | H | 0 | 0         | 10.57127096  |
| H | 0 | -2.176091 | 8.93936092   | H | 0 | -2.176091 | 9.02406296   |
| B | 0 | 0         | -9.23012808  | N | 0 | 0         | -9.14542604  |
| N | 0 | 0         | -3.99287208  | B | 0 | 0         | -3.90817004  |
| C | 0 | 0         | 2.71712592   | C | 0 | 0         | -2.48970404  |
| C | 0 | 0         | -2.57440608  | C | 0 | 0         | 2.80182796   |
| B | 0 | 0         | 4.13641692   | N | 0 | 0         | 4.22111896   |
| N | 0 | 0         | 9.40221392   | B | 0 | 0         | 9.48691596   |

|   |   | A1[H <sub>N</sub> P <sub>N</sub> ] | A3[H <sub>N</sub> P <sub>N</sub> ] |
|---|---|------------------------------------|------------------------------------|
| C | 0 | 1.260969                           | -8.56685391                        |
| C | 0 | 1.591273                           | -7.25766291                        |
| C | 0 | -1.260969                          | -8.56685391                        |

|   |   |           |              |
|---|---|-----------|--------------|
| C | 0 | 0.708707  | -6.10458891  |
| C | 0 | -1.591273 | -7.25766291  |
| C | 0 | -0.708707 | -6.10458891  |
| H | 0 | 0         | -10.16740391 |
| H | 0 | 2.056954  | -9.30507391  |
| H | 0 | 2.65772   | -7.05300391  |
| H | 0 | -2.056954 | -9.30507391  |
| H | 0 | -2.65772  | -7.05300391  |
| C | 0 | 1.151847  | -4.75342491  |
| C | 0 | -1.151847 | -4.75342491  |
| C | 0 | -1.282645 | -1.89681891  |
| C | 0 | 1.282645  | -1.89681891  |
| C | 0 | -1.546067 | -0.52901191  |
| C | 0 | 1.546067  | -0.52901191  |
| C | 0 | -0.717908 | 0.60407909   |
| H | 0 | -2.61049  | -0.31811491  |
| C | 0 | 0.717908  | 0.60407909   |
| H | 0 | 2.61049   | -0.31811491  |
| C | 0 | -1.136157 | 1.94321009   |
| C | 0 | 1.136157  | 1.94321009   |
| C | 0 | -2.409477 | -4.12108891  |
| H | 0 | -3.336578 | -4.68620391  |
| C | 0 | -2.438447 | -2.75271691  |
| H | 0 | -3.392791 | -2.23926891  |
| C | 0 | 2.438447  | -2.75271691  |
| H | 0 | 3.392791  | -2.23926891  |
| C | 0 | 2.409477  | -4.12108891  |
| H | 0 | 3.336578  | -4.68620391  |
| C | 0 | -1.314593 | 4.79386109   |
| C | 0 | -1.587139 | 6.15013409   |
| C | 0 | 1.314593  | 4.79386109   |
| C | 0 | -0.722008 | 7.28434809   |
| C | 0 | 1.587139  | 6.15013409   |
| C | 0 | 0.722008  | 7.28434809   |
| H | 0 | -2.646871 | 6.39562709   |
| H | 0 | 2.646871  | 6.39562709   |
| C | 0 | -1.124814 | 8.61291709   |
| C | 0 | 1.124814  | 8.61291709   |
| C | 0 | 2.401894  | 2.56854609   |
| C | 0 | 2.477813  | 3.92275609   |
| H | 0 | 3.296785  | 1.95622609   |
| H | 0 | 3.449572  | 4.40578909   |
| C | 0 | -2.401894 | 2.56854609   |
| C | 0 | -2.477813 | 3.92275609   |
| H | 0 | -3.296785 | 1.95622609   |
| H | 0 | -3.449572 | 4.40578909   |
| H | 0 | 2.115366  | 9.04260009   |
| H | 0 | 0         | 10.40873009  |
| H | 0 | -2.115366 | 9.04260009   |
| N | 0 | 0         | -9.16141091  |
| N | 0 | 0         | 9.40198809   |
| N | 0 | 0         | -3.92222691  |
| N | 0 | 0         | 4.14034409   |
| C | 0 | 0         | -2.54326091  |
| C | 0 | 0         | 2.77300209   |
